# Supplementary material for: Comprehensive in silico CpG methylation analysis in hepatocellular carcinoma identifies tissue- and tumor-type specific marks disconnected from gene expression
Source: PubMed Central journal article supplement (PMC11682006; doi:10.1007/s13105-024-01045-8), 2024-09-21
Supplement: 13105_2024_1045_MOESM1_ESM.pdf [file 13105_2024_1045_MOESM1_ESM.pdf]

## Supplementary Information

### **Comprehensive *in silico* CpG methylation analysis in hepatocellular carcinoma identifies tissue- and tumor-type specific marks disconnected from gene expression**

Idoia Bilbao<sup>1</sup>, Miriam Recalde<sup>2</sup>, Fabrice Daian<sup>3</sup>, José Maria Herranz<sup>2,4</sup>, María Elizalde<sup>2</sup>, Mercedes Iñarrairaegui<sup>1,4,5</sup>, Matteo Canale<sup>6</sup>, Maite G Fernández-Barrena<sup>2,4,5</sup>, Andrea Casadei-Gardini<sup>7,8</sup>, Bruno Sangro<sup>1,4,5</sup>, Matías A Ávila<sup>2,4,5</sup>, Manuel F Landecho Acha<sup>9</sup>, Carmen Berasain<sup>2,4,#</sup>, María Arechederra<sup>2,4,5,#</sup>.

- **Supplementary Figure Legends**
- **Supplementary Table Legends**
- **Supplementary Figures**
- **Supplementary Tables**

## SUPPLEMENTARY FIGURE LEGENDS.

**Supplementary Figure S1. Global analyses of the three HCC tissue methylomes used for the identification of the hypermethylated CpG list.** (A) Schematic representation of the HCC tissue methylomes used for the *in silico* identification of hypermethylated CpGs in HCC. (B) Hierarchical clustering of the tumor and non-tumoral subgroups of the three studies indicated in Figure S1A performed using the overall DNA methylation content. (C) Dimensionality reduction by UMAP represented as a scatterplot using the different non-tumoral and HCC tissues of the three studies indicated in Figure S1A. (D) CGI mean methylation ( $\beta$ -values) in control samples (n=135) compared to HCC samples (n=670). T-test p-value = 4.31E-28.

**Supplementary Figure S2. Analyses of the methylation level of the identified hypermethylated CpGs in different liver diseases.** (A) Heatmap reporting the mean methylation levels of each of the 39 CpGs hypermethylated in HCC in the three datasets used to analyze methylation status in different non-tumor liver disease GSE61258, GSE60753 and GSE48325. The CpGs are ranked as in Figure 1B. The color scale bar is shown on the right. (NAFLD: non alcoholic fatty liver disease; NASH: nonalcoholic steatohepatitis; PBC: primary biliary cirrhosis; PSC: primary sclerosing cholangitis). (B) Graph showing for each of the 39 selected CpGs, the percentage of patients with the CpG methylated ( $\beta$ -value >0.2). The 39 CpGs are ranked from the CpG methylated in the highest (84.95%) percentage of patients to the lowest (54.70%). (C) Heatmap reporting the mean methylation levels of each of the 39 CpGs hypermethylated in HCC in primary hepatocytes (n=17) and HCC cell lines (FLNEO, H801, HCO2, Hep3B, Huh75, LH86, SNU423, SNU449) from GSE60753. The color scale bar is shown on the left.

**Supplementary Figure S3. Chromosomal distribution of the 39 identified CpGs.** Graph showing the chromosomal distribution of the 39 selected CpGs.

## **SUPPLEMENTARY TABLE LEGENDS.**

**Supplementary Table S1.** Table that contains information from the 3862 CpGs hypermethylated (with a median methylation difference  $>0.2$  and an FDR  $<0.05$ ) in HCC compared to non-tumoral tissues from GSE56588 (224 HCC, 9 cirrhotic livers and 10 control livers), GSE54503 (66 HCC and 66 peritumoral liver samples), and TCGA-LIHC (380 HCC and 50 peritumoral liver samples). CpG site (hg19) in the Illumina 450K array, CGI (hg19) and gene name is reported.

**Supplementary Table S2.** Table that contains information from the 1061 CpGs methylated in HCC tissues but not in any of the blood samples analyzed. CpG site (hg19) in the Illumina 450K array, CGI (hg19) and gene name is reported.

**Supplementary Table S3.** Table that contains information from the 39 CpGs selected as only hypermethylated ( $\beta$ -value  $>0.3$ ) in HCC and not methylated ( $\beta$ -value  $<0.2$ ) in either control liver, cirrhotic tissue or whole blood. CpG ID, CpG site (hg19) in the Illumina 450K array, CpG site (hg19), CGI (hg19), gene name, genomic region is reported.

**Supplementary Table S4.** Table that contains information from the 28 methylomes available in the TCGA. Study acronym, full name, number of non-tumor and tumor samples.

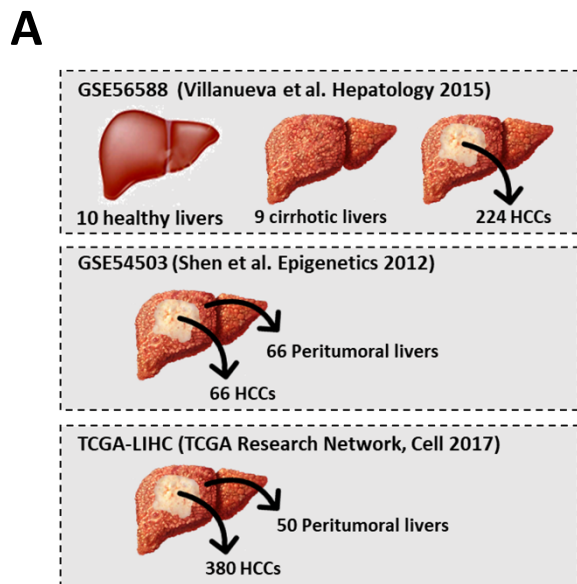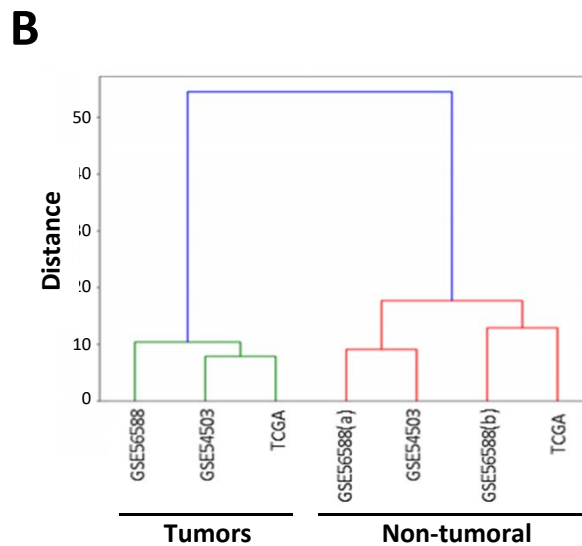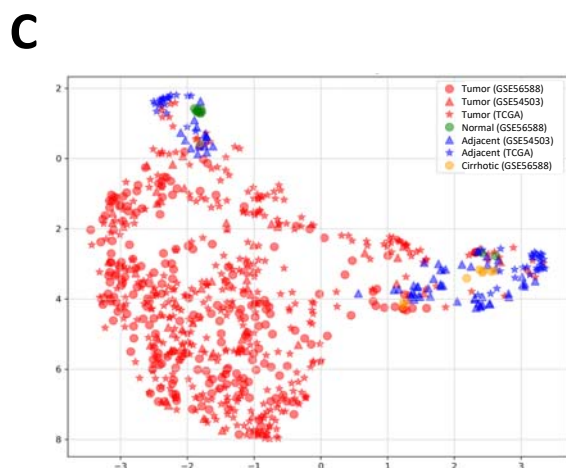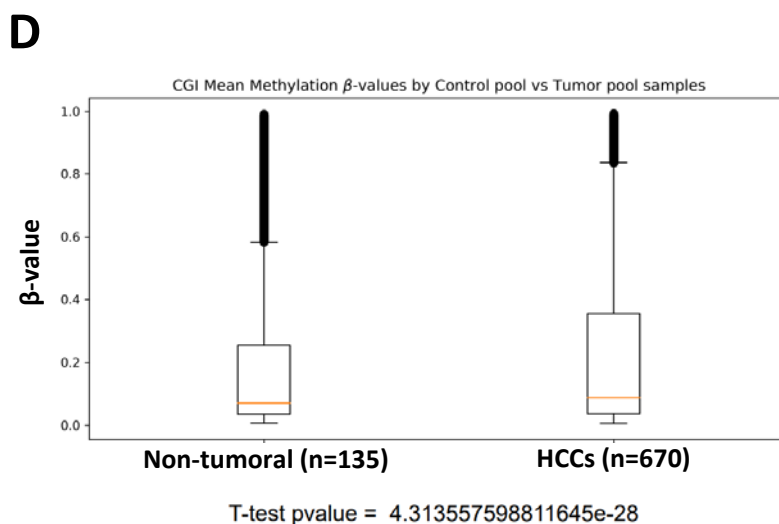

Supplementary Figure S1

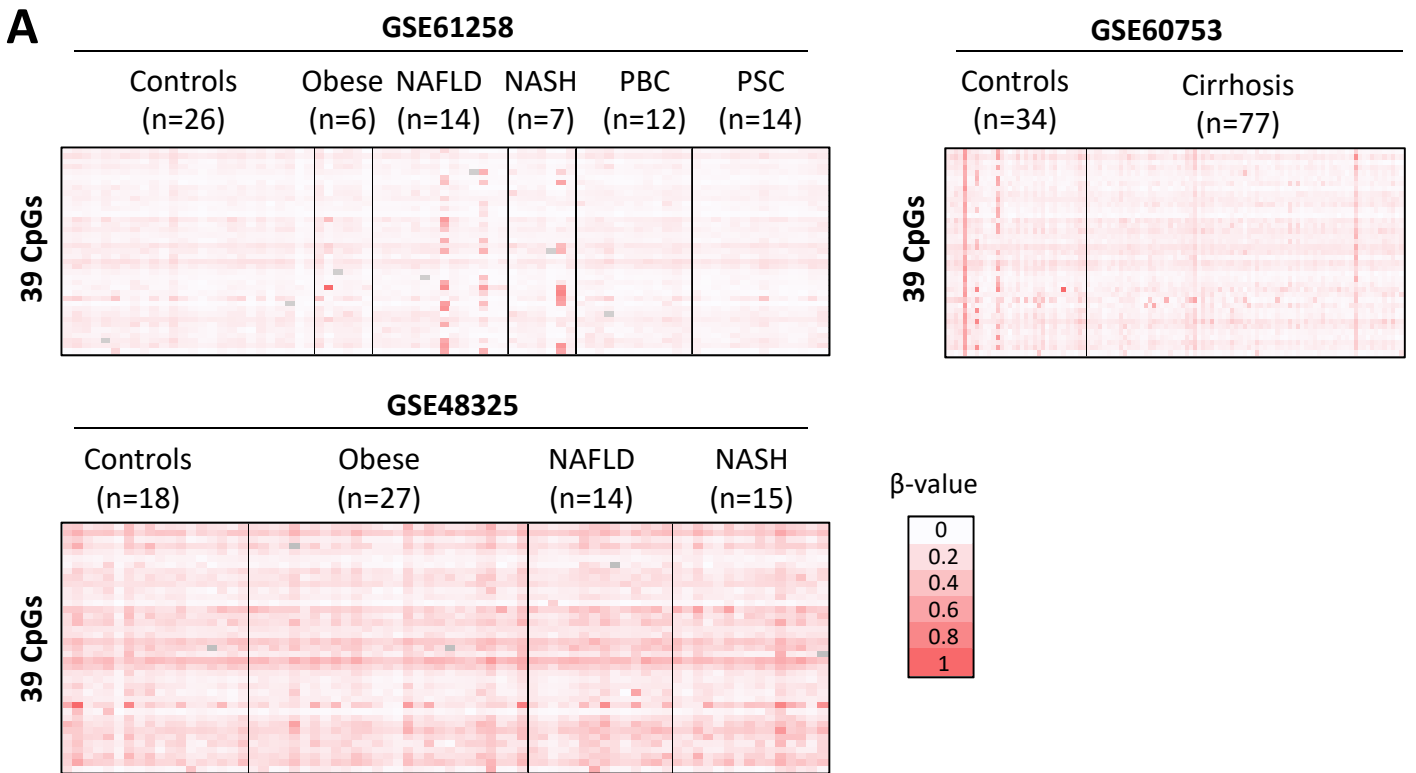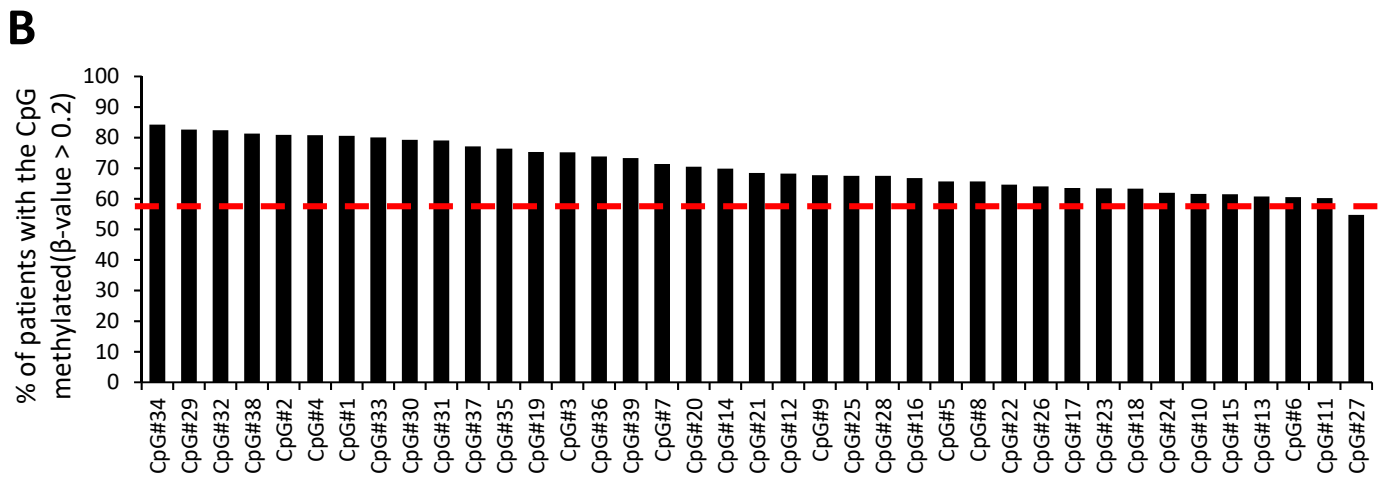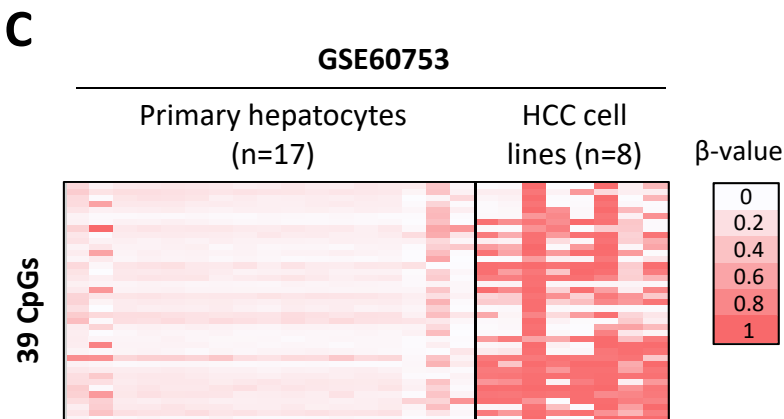

Supplementary Figure S2

**A**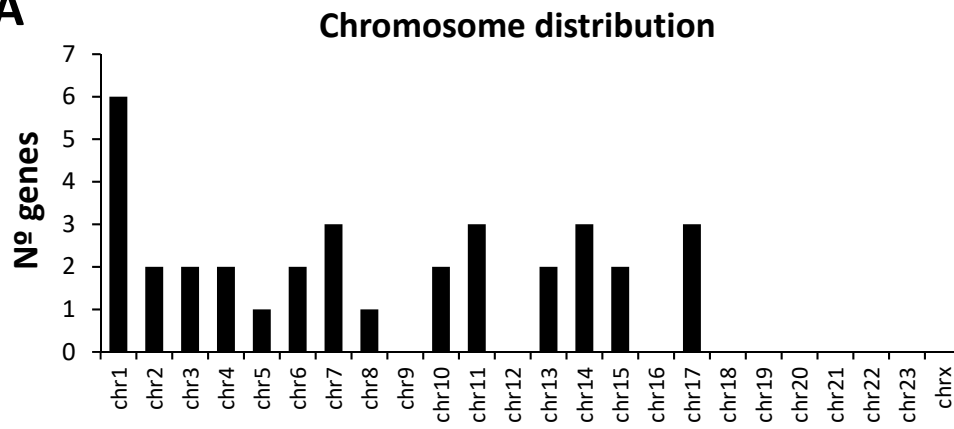

**Table S1**

| CpG site (hg19)_Illumina 450K Array | CGI (hg19)                | Gene name |
|-------------------------------------|---------------------------|-----------|
| cg00002719                          | chr1:169396622-169396869  | CCDC181   |
| cg00022911                          | chr19:19371676-19372393   | HAPLN4    |
| cg00029353                          | chr12:52240773-52242547   |           |
| cg00030422                          | chr3:38080629-38081187    | DLEC1     |
| cg00032205                          | chr8:98289605-98290404    | TSPYL5    |
| cg00035636                          | chr13:21900426-21900637   | MIPEPP3   |
| cg00037457                          | chr17:59531724-59535254   | TBX4      |
| cg00043095                          | chr2:223288923-223290013  | SGPP2     |
| cg00044796                          | chr1:146552329-146552577  |           |
| cg00056074                          | chr2:131485150-131485460  |           |
| cg00058329                          | chr12:133194869-133195544 | P2RX2     |
| cg00090261                          | chr8:101117923-101118693  | RGS22     |
| cg00094518                          | chr7:130417913-130419378  | KLF14     |
| cg00097146                          | chr2:45169506-45171884    | SIX3      |
| cg00108164                          | chr2:263401-265238        | SH3YL1    |
| cg00114029                          | chr1:35350879-35351854    | DLGAP3    |
| cg00117172                          | chr1:25255528-25259005    | RUNX3     |
| cg00121634                          | chr3:169529876-169530435  | LRRC34    |
| cg00121843                          | chr13:33923931-33924781   | STARD13   |
| cg00133595                          | chr16:31225957-31228264   | TRIM72    |
| cg00152008                          | chr1:50884229-50891471    |           |
| cg00155526                          | chr5:32709911-32714450    | NPR3      |
| cg00155882                          | chr8:141107838-141110984  | TRAPPC9   |
| cg00157796                          | chr6:159589637-159591319  |           |
| cg00158789                          | chr17:59531724-59535254   | TBX4      |
| cg00164949                          | chr17:43037167-43037740   | C1QL1     |
| cg00166216                          | chr3:194406441-194409045  | FAM43A    |
| cg00169412                          | chr6:27463177-27463379    |           |
| cg00172597                          | chr1:223536843-223538628  |           |
| cg00177388                          | chr5:72676121-72678421    |           |
| cg00187933                          | chr4:995483-997541        | IDUA      |
| cg00221382                          | chr16:54317822-54324604   |           |
| cg00249511                          | chr11:626729-628037       | SCT       |
| cg00278547                          | chr2:177036255-177037213  | HOXD3     |
| cg00292664                          | chr10:71077947-71079377   | HK1       |
| cg00295794                          | chr13:100641335-100642188 |           |
| cg00298065                          | chr19:58715221-58716033   | ZNF274    |
| cg00303982                          | chr8:145555343-145562310  | SCRT1     |
| cg00307214                          | chr14:69726251-69728393   | GALNT16   |
| cg00314240                          | chr1:92495368-92495964    | EPHX4     |
| cg00318796                          | chr3:68056900-68057167    | FAM19A1   |
| cg00332937                          | chr5:72740052-72740800    |           |
| cg00338735                          | chr4:53728038-53729000    | RASL11B   |
| cg00346208                          | chr1:20669567-20670018    | VWA5B1    |
| cg00356183                          | chr7:751713-752150        | PRKAR1B   |
| cg00366850                          | chr2:45231782-45232550    | SIX2      |

|            |                           |                |
|------------|---------------------------|----------------|
| cg00370229 | chr6:29521111-29521833    |                |
| cg00384539 | chr8:70981874-70984888    | PRDM1 4        |
| cg00388812 | chr8:99960498-99961438    | OSR2           |
| cg00393798 | chr11:8615398-8615889     | STK33          |
| cg00393825 | chr20:42135794-42137062   | L3MBTL1        |
| cg00396667 | chr5:134363093-134365146  | PITX1          |
| cg00399175 | chr2:26395417-26395620    |                |
| cg00421139 | chr8:97172635-97173880    | GDF6           |
| cg00421363 | chr19:49646093-49646308   | PPFIA3         |
| cg00437985 | chr16:21294981-21295414   | CRYM           |
| cg00450824 | chr11:8615398-8615889     | STK33          |
| cg00456086 | chr3:197281606-197283128  | BDH1           |
| cg00458878 | chr7:27260102-27260467    |                |
| cg00460049 | chr1:66998729-66999060    | SGIP1          |
| cg00478479 | chr19:40904445-40904955   | PRX            |
| cg00489401 | chr5:180075689-180076906  | FLT4           |
| cg00495860 | chr21:38065180-38066185   |                |
| cg00497232 | chr4:6665672-6666089      |                |
| cg00500564 | chr10:128993506-128995167 | FAM196A        |
| cg00527440 | chr2:242549374-242549995  | THAP4          |
| cg00529958 | chr13:100620242-100624348 | ZIC5           |
| cg00544436 | chr6:34202568-34206193    | HMGA1          |
| cg00544449 | chr15:79724100-79725643   | KIAA1024       |
| cg00553149 | chr7:99774734-99775583    | STAG3          |
| cg00554413 | chr1:59042014-59043295    | TACSTD2        |
| cg00556112 | chr11:636907-640628       | DRD4           |
| cg00560542 | chr10:75407414-75407706   | SYNPO2L        |
| cg00573330 | chr4:330163-332068        | ZNF141         |
| cg00582971 | chr5:178421226-178422337  | GRM6           |
| cg00584713 | chr1:213123648-213125092  | VASH2          |
| cg00599393 | chr8:22457124-22457753    | C8orf58        |
| cg00612595 | chr21:47717236-47718059   | YBEY           |
| cg00619126 | chr2:105459128-105461770  | LOC100506421   |
| cg00626110 | chr10:134597358-134602649 | NKX6-2         |
| cg00637687 | chr5:95768875-95769080    | PCSK1          |
| cg00642460 | chr5:176827082-176827754  | PFN3           |
| cg00648301 | chr20:20344401-20350605   | INSM1          |
| cg00650809 | chr19:17438055-17440318   | ANO8           |
| cg00667751 | chr6:28956107-28956578    |                |
| cg00667789 | chr1:59042014-59043295    | TACSTD2        |
| cg00674365 | chr19:57018744-57019506   | ZNF471         |
| cg00674679 | chr2:176931576-176932663  |                |
| cg00674706 | chr6:29521111-29521833    |                |
| cg00688297 | chr8:145751956-145756326  | C8orf82;LCRR24 |
| cg00689492 | chr4:1303491-1303835      | MAEA           |
| cg00699945 | chr10:134597358-134602649 | NKX6-2         |
| cg00714725 | chr10:94825547-94826320   | CYP26C1        |
| cg00723271 | chr14:102247661-102248279 | PPP2R5C        |
| cg00723994 | chr12:115104849-115105548 |                |
| cg00727630 | chr20:50721311-50721912   | ZFP64          |



|            |                           |                   |
|------------|---------------------------|-------------------|
| cg00731785 | chr4:15704641-15705000    | BST1              |
| cg00741609 | chr10:102893661-102895059 | TLX1              |
| cg00741624 | chr14:93896737-93897466   | UNC79             |
| cg00748373 | chr16:68676451-68676843   |                   |
| cg00752195 | chr4:1396292-1401730      |                   |
| cg00753478 | chr12:21810489-21810766   | LDHB              |
| cg00755043 | chr9:91149946-91150648    | NXNL2             |
| cg00767010 | chr9:99481903-99482470    |                   |
| cg00772020 | chr7:100806280-100809064  | VGf               |
| cg00773413 | chr10:77155129-77169600   | ZNF503-AS2        |
| cg00773902 | chr19:19006032-19007546   | CERS1             |
| cg00788177 | chr6:159360626-159360952  |                   |
| cg00800512 | chr19:58094740-58095764   | ZIK1              |
| cg00800993 | chr20:58514072-58515636   | PPP1R3D; FAM21 7B |
| cg00803088 | chr10:43600147-43601165   | RET               |
| cg00806198 | chr17:72968168-72969164   | HID1              |
| cg00807871 | chr6:37616723-37617179    | MDGA1             |
| cg00817367 | chr12:52400468-52401696   | GRASP             |
| cg00824018 | chr10:105036629-105038084 | INA               |
| cg00849610 | chr17:59528980-59530266   | TBX4              |
| cg00864183 | chr17:48045789-48047207   | DLX4              |
| cg00865356 | chr4:91048412-91049682    | CCSER1            |
| cg00866399 | chr2:73143056-73148260    | EMX1              |
| cg00871706 | chr7:138666359-138666972  |                   |
| cg00875989 | chr18:44772993-44775577   | SKOR2             |
| cg00884093 | chr22:46929318-46934861   | CELSR1            |
| cg00890257 | chr14:100625320-100626461 | DEGS2             |
| cg00891278 | chr3:126113548-126113967  | CCDC37            |
| cg00894757 | chr3:170136243-170137886  | CLDN11            |
| cg00896540 | chr8:82192379-82193685    | FABP5             |
| cg00907283 | chr22:20286319-20287630   |                   |
| cg00909646 | chr8:67873389-67875600    | TCF24             |
| cg00914041 | chr8:91997231-91997906    | LOC100127983      |
| cg00922376 | chr1:14026482-14027200    | PRDM2             |
| cg00926400 | chr2:198649752-198651599  | BOLL              |
| cg00939495 | chr4:9783036-9784960      | DRD5              |
| cg00956199 | chr10:8077830-8078378     |                   |
| cg00958884 | chr17:74533282-74534566   | PRCD; CYGB        |
| cg00959249 | chr5:95768875-95769080    | PCSK1             |
| cg00963169 | chr1:50513645-50514320    | ELAVL4            |
| cg00966099 | chr4:184718264-184719754  |                   |
| cg00971050 | chr17:40573741-40575526   | PTRF              |
| cg00981879 | chrX:39680141-39681418    |                   |
| cg00983948 | chr6:158937286-158937491  |                   |
| cg00987080 | chr1:32930501-32931061    | ZBTB8B            |
| cg00995327 | chr3:142837886-142840838  | CHST2             |
| cg01003961 | chr7:20823308-20825662    | SP8               |
| cg01009697 | chr9:87283179-87285704    | NTRK2             |
| cg01025774 | chr5:42944267-42944582    |                   |
| cg01031101 | chr6:28226980-28227483    | NKAPL; ZKSCAN4    |

|            |                           |                       |
|------------|---------------------------|-----------------------|
| cg01047586 | chr2:176933132-176933449  |                       |
| cg01048445 | chr2:241771656-241772194  |                       |
| cg01060026 | chr3:129323916-129325332  | PLXND1                |
| cg01072076 | chr5:1930755-1931986      | AC124852              |
| cg01076997 | chr22:37815804-37816477   | ELFN2                 |
| cg01097384 | chr11:1357627-1359081     |                       |
| cg01108118 | chr6:391189-393790        | IRF4                  |
| cg01112965 | chr19:38852312-38853485   | CATSPERG              |
| cg01120173 | chr17:5019638-5019879     | ZNF232                |
| cg01135780 | chr5:158527375-158527983  | AK123543              |
| cg01142668 | chr16:2086421-2086892     | SLC9A3R2              |
| cg01143804 | chr4:40751843-40752493    | NSUN7                 |
| cg01163842 | chr14:95234613-95236569   | GSC                   |
| cg01172903 | chr19:12203029-12203503   | ZNF788                |
| cg01175020 | chr10:102896343-102896665 | TLX1                  |
| cg01178624 | chr11:65359293-65360328   | KCNK7                 |
| cg01178680 | chr15:74425092-74428821   | ISLR2                 |
| cg01181227 | chr4:1396292-1401730      |                       |
| cg01196531 | chr15:53080459-53083699   | ONECUT1               |
| cg01204305 | chr3:49755764-49757317    | AMIGO3; GMPPB; RNF123 |
| cg01204606 | chr11:116450660-116451912 |                       |
| cg01215762 | chr7:27212417-27214396    | HOXA10                |
| cg01237333 | chr9:112917-114839        |                       |
| cg01240444 | chr12:124246525-124247254 | DNAH10                |
| cg01246835 | chr7:6703504-6704075      | AK123300              |
| cg01268683 | chr19:53141176-53141813   | ZNF83                 |
| cg01281911 | chr1:47881897-47883065    | FOX E3                |
| cg01288372 | chr2:209271338-209271987  | PTH2R                 |
| cg01294058 | chr11:2905024-2907024     | CDKN1C                |
| cg01295392 | chr12:108168987-108169570 | ASCL4                 |
| cg01303723 | chr10:134597358-134602649 | NKX6-2                |
| cg01312482 | chr5:178450631-178451216  | ZNF879                |
| cg01321673 | chr22:50438258-50438776   | IL17REL               |
| cg01323148 | chr2:206549600-206551316  | NRP2                  |
| cg01348293 | chr7:27260102-27260467    |                       |
| cg01357429 | chr7:27284640-27286237    | EVX1                  |
| cg01370541 | chr4:41882451-41882964    | BC025350              |
| cg01373292 | chr1:7764594-7765856      | CAMTA1                |
| cg01379240 | chr3:138663719-138666346  | FOXL2; FOXL2NB        |
| cg01381846 | chr7:27203916-27206462    | HOXA9                 |
| cg01384488 | chr10:134597358-134602649 | NKX6-2                |
| cg01419831 | chr2:162283582-162284677  |                       |
| cg01420426 | chr1:41831977-41832542    |                       |
| cg01422476 | chr16:1921898-1922426     | MEIOB                 |
| cg01423964 | chr1:111216245-111217937  | KCNA3                 |
| cg01428589 | chr19:33165267-33168099   | RGS9BP                |
| cg01435344 | chr10:99609426-99610116   | GOLGA7B               |
| cg01436998 | chr19:38307879-38308526   | LOC644554             |
| cg01438365 | chr17:59473061-59483266   | TBX2                  |
| cg01439876 | chr1:119543057-119543454  |                       |

|            |                           |                         |
|------------|---------------------------|-------------------------|
| cg01445942 | chr7:72847934-72850032    | FZD9                    |
| cg01447112 | chr7:6703504-6704075      | AKT123300               |
| cg01449136 | chr14:61108955-61109786   |                         |
| cg01452847 | chr17:46710813-46711419   |                         |
| cg01480180 | chr7:90893568-90896683    | FZD1                    |
| cg01482645 | chr8:104510871-104513913  | RIMS2                   |
| cg01485998 | chr1:213123648-213125092  | VASH2                   |
| cg01490894 | chr6:26550783-26551114    |                         |
| cg01499217 | chr18:10454454-10455268   | APCDD1                  |
| cg01503065 | chr4:155410624-155413393  | DCHS2                   |
| cg01513307 | chr6:108478524-108479558  | AF520419                |
| cg01527459 | chr10:82116203-82117120   | DYDC2                   |
| cg01529637 | chr20:50721311-50721912   | ZFP64                   |
| cg01532168 | chr8:140714586-140718259  | KCNK9                   |
| cg01532436 | chr19:48983563-48984175   | CYTH2                   |
| cg01535733 | chr6:153450993-153452792  | RGS17                   |
| cg01538344 | chrX:100546064-100546550  | TAF7L                   |
| cg01541645 | chr14:61103979-61104663   |                         |
| cg01543654 | chr17:46800534-46800746   | HOSXB-AS5               |
| cg01550055 | chr1:119543057-119543454  |                         |
| cg01556502 | chr14:103655242-103655928 | LINC00605               |
| cg01557547 | chr3:157822974-157823836  | SHOX2                   |
| cg01558212 | chr2:200320503-200329681  | SATB2                   |
| cg01561869 | chr5:140725052-140725891  | PCDHGA1                 |
| cg01565320 | chr4:42399153-42400802    | SHISA3                  |
| cg01571001 | chr3:128215213-128216905  |                         |
| cg01576677 | chr2:45029729-45030035    |                         |
| cg01579950 | chr11:64480200-64481344   | NRXN2                   |
| cg01592801 | chr8:99438693-99440425    | KCNS2                   |
| cg01597066 | chr19:49127389-49127720   | SPHK2                   |
| cg01603290 | chr17:40805675-40805957   |                         |
| cg01610632 | chr3:147126989-147128999  | ZIC1                    |
| cg01627847 | chr17:43339125-43339832   | SPATA32; MAP3K14-AS1    |
| cg01629716 | chr15:45996454-45996735   |                         |
| cg01635405 | chr10:124894076-124897366 | HMX3                    |
| cg01642521 | chr11:20618198-20619920   | SLC6A5                  |
| cg01645753 | chr15:83315117-83317541   | CPEB1                   |
| cg01649597 | chr2:232394764-232395337  | NMUR1                   |
| cg01658421 | chr2:176944088-176948446  | EVX2                    |
| cg01684881 | chr17:42634830-42636851   | FZD2                    |
| cg01692233 | chr18:76737006-76741244   | SALL3                   |
| cg01696193 | chr6:56818874-56820308    | BEND6                   |
| cg01718447 | chr7:30721373-30722445    | CRHR2                   |
| cg01720033 | chr17:62774367-62777797   | BPYFP1-KPNA2P3; ARHGAP2 |
| cg01723148 | chr12:58021295-58022037   | B4GALNT1                |
| cg01725199 | chr9:101569906-101570349  | GALNT12                 |
| cg01730970 | chr1:27687025-27687743    | MAP3K6                  |
| cg01734112 | chr2:26624604-26625057    | DRC1                    |
| cg01759761 | chr5:7849946-7850439      | C5orf49                 |
| cg01762827 | chr16:69139629-69141900   | HAS3                    |

|            |                           |                    |
|------------|---------------------------|--------------------|
| cg01765249 | chr17:59473061-59483266   | TBX2               |
| cg01777643 | chr1:224803638-224805314  | CNIH3              |
| cg01781974 | chr14:52534582-52536722   | NID2               |
| cg01791874 | chr5:16179065-16180420    | MARCH11            |
| cg01806520 | chr8:93114057-93115979    | RUNX1T1            |
| cg01815671 | chr3:126113548-126113967  | CCDC37             |
| cg01817364 | chr5:43037260-43037520    |                    |
| cg01824969 | chr8:67873389-67875600    | TCF24              |
| cg01833196 | chr10:105452339-105453230 | SH3PXD2A           |
| cg01851088 | chr3:48698336-48701667    | CELSR3             |
| cg01860753 | chr1:206730398-206730908  | RASSF5             |
| cg01870826 | chr7:5111621-5112088      | RBAKDN             |
| cg01881524 | chr5:54179364-54180171    |                    |
| cg01885071 | chr14:90167783-90168352   |                    |
| cg01893212 | chr7:49813009-49815752    | VWC2               |
| cg01901107 | chr7:150747977-150748519  | ASIC3              |
| cg01912921 | chr6:1604607-1615866      | FOXC1              |
| cg01913455 | chr17:59473061-59483266   | TBX2               |
| cg01921432 | chr1:91182510-91182857    | BARHL2             |
| cg01923218 | chr11:93063599-93064076   | CCDC67             |
| cg01927745 | chr5:72676121-72678421    |                    |
| cg01939477 | chr11:43602546-43603215   | MIR129-2           |
| cg01959562 | chr4:57975861-57976916    | IGFBP7; IGFBP7-AS1 |
| cg01961447 | chr22:38220590-38221619   | GALR3              |
| cg01964152 | chr6:30095174-30095610    |                    |
| cg01965047 | chr16:2139804-2142170     | PKD1               |
| cg01972418 | chr14:37125220-37125661   |                    |
| cg01981601 | chr8:60032533-60032746    |                    |
| cg01992935 | chrX:108867763-108868486  | KCNE1L             |
| cg01992990 | chr1:202779791-202780684  | KDM5B-AS1          |
| cg01995480 | chr22:45403037-45406372   | PHF21B             |
| cg01996714 | chr20:3218579-3220930     | SLC4A11            |
| cg02009088 | chr5:139227606-139228279  | NRG2               |
| cg02011074 | chr1:171810468-171811325  | DNM3               |
| cg02017200 | chr19:49255779-49256495   | FUT1               |
| cg02018277 | chr15:65116014-65116567   | PIF1               |
| cg02037307 | chr5:134363093-134365146  | PITX1              |
| cg02038168 | chr22:39784355-39785104   | TAB1               |
| cg02052142 | chr14:60794577-60794867   |                    |
| cg02062480 | chr6:108485672-108490539  | NR2E1              |
| cg02063759 | chr1:119543057-119543454  |                    |
| cg02063817 | chr7:27252682-27253835    |                    |
| cg02065637 | chr20:61806255-61810867   |                    |
| cg02071005 | chr2:175199464-175202639  | SP9                |
| cg02072400 | chr12:127630512-127631199 |                    |
| cg02081266 | chr17:59528980-59530266   | TBX4               |
| cg02090762 | chr17:79503587-79504181   | FSCN2              |
| cg02093732 | chr15:30515267-30518445   | DLKZP434L187       |
| cg02096396 | chr2:26395417-26395620    | GAREML             |
| cg02109484 | chr2:74875129-74875562    | M1AP               |

|            |                           |            |
|------------|---------------------------|------------|
| cg02119792 | chr21:47009997-47011163   |            |
| cg02119927 | chr10:71077947-71079377   | HK1        |
| cg02132470 | chr7:98467024-98468058    | TMEM130    |
| cg02143877 | chr20:52789253-52790986   | CYP24A1    |
| cg02147764 | chr2:45169506-45171884    | SIX3       |
| cg02149189 | chr6:29521111-29521833    | UBD        |
| cg02164046 | chr3:187387915-187388176  | SST        |
| cg02164129 | chr5:76925446-76926875    | OTP        |
| cg02168303 | chr7:27265159-27265493    |            |
| cg02177231 | chr1:119529820-119530712  | TBX15      |
| cg02215070 | chr7:134143116-134144063  | AKR1B1     |
| cg02227496 | chr9:33750520-33751160    | PRSS3      |
| cg02227867 | chr8:22457124-22457753    | C8orf58    |
| cg02246609 | chr6:28583935-28584289    | ZBED9      |
| cg02253760 | chr3:147077116-147077672  |            |
| cg02262187 | chr16:31498651-31500564   | SLC5A2     |
| cg02266771 | chr6:27218793-27219813    | PRSS16     |
| cg02267270 | chr6:37616394-37616621    | MDGA1      |
| cg02280532 | chr2:160760605-160761452  | LY75       |
| cg02288341 | chr5:137610106-137610311  | GFRA3      |
| cg02293118 | chr7:44349112-44349716    | CAMK2B     |
| cg02295078 | chr17:16472075-16472800   | ZNF287     |
| cg02306630 | chr10:134597358-134602649 | NKX6-2     |
| cg02320543 | chr14:61108955-61109786   |            |
| cg02320862 | chr17:75368689-75370506   | SEPTIN9    |
| cg02325540 | chr10:94833273-94835256   | CYP26A1    |
| cg02330121 | chr6:118228043-118229811  | SLC35F1    |
| cg02337836 | chr1:110210582-110210956  | GSTM2      |
| cg02339682 | chr6:56818874-56820308    | DST        |
| cg02346492 | chr17:9142981-9143839     | NTN1       |
| cg02349096 | chr19:11450017-11450414   | RAB3D      |
| cg02362385 | chr19:19738573-19739821   | LPAR2      |
| cg02373152 | chr6:52226754-52228006    | PAQR8      |
| cg02380334 | chr14:70038109-70040302   | CCDC177    |
| cg02392619 | chr1:213123648-213125092  | VASH2      |
| cg02396496 | chr17:74533282-74534566   | PRCD; CYGB |
| cg02399524 | chr11:63258379-63258804   | HRASLS5    |
| cg02401454 | chr16:230302-231761       | HBQ1       |
| cg02408775 | chr12:48206722-48207126   | HDAC7      |
| cg02409878 | chr8:99960498-99961438    | OSR2       |
| cg02428119 | chr19:58520755-58521224   |            |
| cg02430935 | chr10:124907284-124911035 | HMX2       |
| cg02433564 | chr6:37673309-37673774    |            |
| cg02434443 | chr11:15136059-15136545   | INSC       |
| cg02446647 | chr6:133562087-133563586  | EYA4       |
| cg02447304 | chr6:74024403-74025020    |            |
| cg02452966 | chr19:39055500-39056379   | RYR1       |
| cg02457680 | chr1:154474108-154475699  | TDRD10     |
| cg02466113 | chr4:76555367-76556079    | CDKL2      |
| cg02467990 | chr7:49813009-49815752    | VWC2       |

|            |                           |                         |
|------------|---------------------------|-------------------------|
| cg02473540 | chr19:58570394-58571779   | ZNF135                  |
| cg02478448 | chr13:37005582-37006453   | CCNA1                   |
| cg02487331 | chr1:146550291-146551260  |                         |
| cg02511231 | chr5:170735170-170739863  | TLX3                    |
| cg02523270 | chr3:193987426-193987758  |                         |
| cg02527669 | chr2:220416864-220417869  | OBSL1                   |
| cg02532096 | chr11:111410933-111412199 | LAYN                    |
| cg02533423 | chr7:27231806-27233097    |                         |
| cg02553663 | chr17:80291021-80292394   | SECTM1                  |
| cg02557695 | chr7:90893568-90896683    | FZD1                    |
| cg02567119 | chr10:102891011-102891794 | TLX1NB                  |
| cg02571816 | chr19:38746639-38747379   | PPP1R14A                |
| cg02578368 | chr6:26250437-26250827    | HIST1H3F                |
| cg02583418 | chr2:105468852-105473488  | POU3F3                  |
| cg02583525 | chr2:26624604-26625057    | DRC1                    |
| cg02586551 | chr11:73693703-73694802   | UCP2                    |
| cg02587316 | chr19:37095681-37096589   | ZNF382                  |
| cg02590401 | chr19:48983563-48984175   | CYTH2                   |
| cg02592271 | chr2:27665252-27665670    | KRTCAP3                 |
| cg02598441 | chr17:62774367-62777797   | BPTFP1-KPNA2P3; ARHGAP2 |
| cg02604524 | chr3:128719866-128721245  | EFCC1                   |
| cg02622316 | chr6:28367125-28367651    | ZSCAN12                 |
| cg02623400 | chr1:50513645-50514320    | ELAVL4                  |
| cg02624770 | chr7:28995306-28998541    | TRIL                    |
| cg02629281 | chr11:8102359-8102913     | TUB                     |
| cg02631838 | chr1:33358470-33359449    | HPCA                    |
| cg02636041 | chr10:43697778-43698177   | RASGEF1A                |
| cg02637078 | chr19:55684877-55685317   | SYT5                    |
| cg02637318 | chr8:38965014-38965423    | ADAM32                  |
| cg02647941 | chr3:147126989-147128999  | ZIC1                    |
| cg02659086 | chr11:67350929-67351953   | GSTP1                   |
| cg02659794 | chr12:21810489-21810766   | LDHB                    |
| cg02668581 | chr2:216877900-216878352  | MREG                    |
| cg02675308 | chr4:76555367-76556079    | CDKL2                   |
| cg02683759 | chr2:157176252-157177346  |                         |
| cg02685896 | chr17:27038085-27038919   | PROCA1                  |
| cg02694017 | chr19:54485304-54486322   | CACNG8                  |
| cg02694427 | chr2:176964063-176965509  | HOXD2                   |
| cg02699694 | chr2:9143128-9144630      | MBOAT2                  |
| cg02710296 | chr1:182921820-182922644  | SHCBP1L                 |
| cg02712145 | chr7:30721373-30722445    | CRHR2                   |
| cg02716516 | chr3:45837481-45838256    | SLC6A20                 |
| cg02728595 | chr3:196255496-196256013  |                         |
| cg02732252 | chr16:3067522-3068358     | CLDN6                   |
| cg02741521 | chr3:9745500-9746782      | CPNE9                   |
| cg02745211 | chr3:132756986-132757895  | TMEM108                 |
| cg02745636 | chr14:61103979-61104663   |                         |
| cg02746869 | chr10:17270431-17272617   | VIM                     |
| cg02747748 | chr17:43506829-43510380   | ARHGAP27                |
| cg02759846 | chr19:51227662-51228883   | CLEC11A                 |

|            |                           |                      |
|------------|---------------------------|----------------------|
| cg02770054 | chr19:36048557-36049673   | ATP4A                |
| cg02776659 | chr21:47717236-47718059   | YBEY                 |
| cg02776664 | chr19:12978360-12978785   | MAST1                |
| cg02781618 | chr4:42152767-42154984    | BEND4                |
| cg02782426 | chr3:40428652-40429015    | ENTPD3               |
| cg02787991 | chr17:80291021-80292394   | SECTM1               |
| cg02788401 | chr17:48585386-48586167   | MYCBPAP              |
| cg02792538 | chr22:38476837-38478839   | SLC16A8              |
| cg02798576 | chr10:101290026-101290338 | LINC01475            |
| cg02801359 | chr20:58507756-58509517   | FAM217B              |
| cg02811627 | chr14:103394398-103397070 | AMN                  |
| cg02823783 | chr12:124246525-124247254 | DNAH10               |
| cg02826439 | chr3:120003884-120004426  | GPR156               |
| cg02829688 | chr1:119526783-119527192  | TBX15                |
| cg02831587 | chr11:13689589-13690724   | FAR1                 |
| cg02849693 | chr19:54401705-54402472   | PRKCG                |
| cg02858118 | chr3:48693119-48694768    | CELSR3               |
| cg02863489 | chr16:2765620-2765855     | PRSS27               |
| cg02863856 | chr13:33923931-33924781   | STARD13              |
| cg02874376 | chr14:101192852-101193499 | DLK1                 |
| cg02881929 | chr4:41882451-41882964    | LINC00682            |
| cg02884176 | chr2:88751336-88752865    | FOXI3                |
| cg02884239 | chr17:75368689-75370506   | SEPTIN9              |
| cg02886408 | chr10:133794899-133796598 | BNIP3                |
| cg02893180 | chr22:50919454-50920376   | ADM2                 |
| cg02900766 | chr15:58357310-58358776   | ALDH1A2              |
| cg02909790 | chr6:26271346-26271588    | HIST1H3G             |
| cg02912326 | chr6:97284831-97285782    | GPR63                |
| cg02919936 | chr8:70981874-70984888    | PRDM14               |
| cg02928664 | chr19:54974176-54976819   | CDC42EP5             |
| cg02935627 | chr19:290595-292249       | PLPP2                |
| cg02938303 | chr3:45187027-45187946    | CDCP1                |
| cg02952008 | chr1:228603707-228604567  | TRIM17               |
| cg02969243 | chrX:11445528-11446182    | ARHGAP6              |
| cg02970297 | chr7:102920310-102921514  | DPY19L2P2            |
| cg02970696 | chr3:125075916-125076481  | ZNF148               |
| cg02973171 | chr11:82443436-82444976   | FAM181B              |
| cg03005603 | chr19:52873085-52873572   | ZNF880               |
| cg03011535 | chr20:42543098-42545137   | TOX2                 |
| cg03018796 | chr22:37730552-37731415   |                      |
| cg03023152 | chr8:102505513-102506430  | GRHL2                |
| cg03024619 | chr3:71802561-71804209    | EIF4E3               |
| cg03045635 | chr4:9783036-9784960      | DRD5                 |
| cg03048083 | chr17:43339125-43339832   | SPATA32; MAP3K14-AS1 |
| cg03058660 | chr19:48919174-48919412   | GRIN2D               |
| cg03059131 | chr15:60296136-60298520   | FOXB1                |
| cg03062252 | chr6:37616394-37616621    | MDGA1                |
| cg03063639 | chr15:83775862-83776922   | TM6SF1               |
| cg03066050 | chr9:110249749-110252660  | KLF4                 |
| cg03070194 | chr1:110210582-110210956  | GSTM2                |

|            |                           |            |
|------------|---------------------------|------------|
| cg03070297 | chr10:128993506-128995167 | DOCK1      |
| cg03073402 | chr19:42927286-42928598   | LIPE       |
| cg03109306 | chr11:123524734-123525685 | SCN3B      |
| cg03109827 | chr10:133109194-133111052 | TCERG1L    |
| cg03113878 | chr7:100091181-100091598  | NYAP1      |
| cg03127334 | chr21:40032244-40033665   | ERG        |
| cg03129384 | chr10:128993506-128995167 | DOCK1      |
| cg03141620 | chr2:172949243-172950126  |            |
| cg03157698 | chr10:113943284-113943657 | GPAM       |
| cg03166753 | chr6:38682950-38683265    | DNAH8      |
| cg03166835 | chr19:50393070-50393998   | IL4I1      |
| cg03172947 | chr20:44034459-44035954   | DBNDD2     |
| cg03190219 | chr7:25898238-25898771    |            |
| cg03192598 | chr19:12305553-12306304   |            |
| cg03200052 | chr1:223536843-223538628  | SUSD4      |
| cg03204605 | chr4:7940564-7941853      | AFAP1      |
| cg03208016 | chr1:180123556-180124584  | QSOX1      |
| cg03209642 | chr15:91427541-91427905   | FES        |
| cg03216846 | chr1:119543822-119544339  |            |
| cg03217795 | chr16:23846942-23848102   | PRKCB      |
| cg03228132 | chr7:129780475-129781597  |            |
| cg03241244 | chr12:122016171-122017693 | KDM2B      |
| cg03244411 | chr6:99295742-99296454    |            |
| cg03255182 | chr12:54423428-54423712   | HOXC6      |
| cg03257575 | chr1:46951169-46951792    |            |
| cg03289872 | chr19:56988314-56989741   | ZNF667     |
| cg03306374 | chr16:23846942-23848102   | PRKCB      |
| cg03306486 | chr19:1465207-1471241     | APC2       |
| cg03308628 | chr12:95941907-95942979   | USP44      |
| cg03309253 | chr19:41119032-41120394   | LTBP4      |
| cg03310242 | chr12:2903390-2905189     | FKBP4      |
| cg03313945 | chr13:100620242-100624348 | ZIC5       |
| cg03321592 | chr1:19991147-19992788    | HTR6       |
| cg03323636 | chr11:9025096-9026315     | NRIP3      |
| cg03323696 | chr5:59189047-59189894    | PDE4D      |
| cg03326059 | chr11:13689589-13690724   | FAR1       |
| cg03333634 | chr8:11555100-11555603    | GATA4      |
| cg03336086 | chr5:79330929-79331488    | THBS4      |
| cg03340649 | chr3:44626326-44626794    | ZNF660     |
| cg03348397 | chr8:54789582-54790665    | RGS20      |
| cg03348461 | chr1:7022002-7022308      | CAMTA1     |
| cg03354992 | chr10:88149267-88149738   |            |
| cg03361164 | chr6:100915603-100915883  |            |
| cg03363161 | chr3:147138917-147139564  | LOC440982  |
| cg03397307 | chr12:3862069-3862606     | CRACR2A    |
| cg03405315 | chr11:8615398-8615889     | STK33      |
| cg03407747 | chr17:6898821-6900427     | ALOX12-AS1 |
| cg03409187 | chr6:29521111-29521833    |            |
| cg03410231 | chr7:143042509-143042867  | CLCN1      |
| cg03422911 | chr1:237205127-237206644  | RYR2       |



|            |                           |                             |
|------------|---------------------------|-----------------------------|
| cg03423149 | chr11:63766059-63768666   | MACROD1                     |
| cg03444245 | chr11:45376932-45377243   | LOC101928812                |
| cg03451670 | chr2:236578081-236580153  | AGAP1                       |
| cg03455458 | chr1:213123648-213125092  | VASH2                       |
| cg03467725 | chr16:1921898-1922426     | MEIOB                       |
| cg03468349 | chr2:263401-265238        | SH3YL1                      |
| cg03496114 | chr17:80329067-80330208   |                             |
| cg03499234 | chr1:47909713-47911020    |                             |
| cg03499808 | chr11:73018453-73020563   | ARHGEF17                    |
| cg03506033 | chr11:75378417-75379882   | MAP6                        |
| cg03509671 | chr3:101497831-101498648  | NXPE3                       |
| cg03517376 | chr16:30389036-30390631   | MYLPF                       |
| cg03524572 | chr20:62283517-62284835   | STMN3                       |
| cg03526459 | chr1:146549851-146550075  |                             |
| cg03536474 | chr12:54366816-54369103   | HOTAIR                      |
| cg03544320 | chr4:5894072-5895116      | CRMP1                       |
| cg03562414 | chr19:52390842-52391368   | ZNF577                      |
| cg03585419 | chr19:54369388-54369809   | MYADM                       |
| cg03593550 | chr19:54485304-54486322   | CACNG8                      |
| cg03599078 | chr10:8077830-8078378     |                             |
| cg03607359 | chr5:176056521-176057494  | SNCB                        |
| cg03609960 | chr12:99288223-99289374   | ANKS1B                      |
| cg03611452 | chr19:38182794-38183327   | ZNF781                      |
| cg03612722 | chr22:27053082-27053629   | MIAT                        |
| cg03614193 | chr18:55019708-55021605   | ST8SIA3                     |
| cg03640756 | chr5:140864528-140864748  | 7,8,9,10,11,12; PCDHGB1,2,3 |
| cg03646234 | chr3:46742765-46743086    | TMIE                        |
| cg03650119 | chr1:228345378-228346700  | GJC2                        |
| cg03650674 | chr8:102505513-102506430  | GRHL2                       |
| cg03651493 | chr5:32709911-32714450    | NRP3                        |
| cg03656099 | chr17:59473061-59483266   | TBX2                        |
| cg03666741 | chr11:9025096-9026315     | NRIP3                       |
| cg03671191 | chr19:52207133-52207731   | SPACA6                      |
| cg03673965 | chr6:108497596-108497996  | NR2E1                       |
| cg03679755 | chr10:101874822-101875139 | TPM4P1                      |
| cg03695666 | chr19:38210108-38210692   | ZNF607                      |
| cg03698009 | chr7:27203916-27206462    | HoxA9                       |
| cg03699623 | chr2:121200504-121200788  |                             |
| cg03705926 | chr19:6740670-6741203     | TRIP10                      |
| cg03710719 | chr19:36389546-36389967   | NFKBID                      |
| cg03720581 | chr11:506354-508009       | RNH1                        |
| cg03728046 | chr7:6566067-6566650      | GRID2IP                     |
| cg03729251 | chr4:151500764-151501299  | LRBA                        |
| cg03730428 | chr11:32008803-32009044   | RCN1                        |
| cg03731268 | chr1:62660556-62660946    | L1TD1                       |
| cg03733219 | chr19:38886110-38886615   | SPRED3                      |
| cg03733760 | chr11:69517841-69519929   | FGF19                       |
| cg03734595 | chr18:9333897-9334244     |                             |
| cg03738025 | chr6:105388191-105389545  | LIN28B; LIN28B-AS1          |
| cg03738707 | chr2:128453175-128453446  |                             |

|            |                           |                |
|------------|---------------------------|----------------|
| cg03740978 | chr18:24126781-24131138   | KCTD1          |
| cg03753391 | chr17:59473061-59483266   | TBX2           |
| cg03755177 | chr7:44349112-44349716    | CAMK2B         |
| cg03762994 | chr17:6898821-6900427     | ALOX12-AS1     |
| cg03766620 | chr2:127783082-127783311  |                |
| cg03768777 | chr1:213123648-213125092  | VASH2          |
| cg03776464 | chr2:222436035-222438941  | EPHA4          |
| cg03780132 | chr5:42951077-42952410    |                |
| cg03780851 | chr8:102504479-102504841  | GRHL2          |
| cg03786933 | chr16:69760294-69760506   | NQO1           |
| cg03787864 | chr16:88716990-88717606   | CYBA           |
| cg03803071 | chr19:22034395-22034943   | ZNF43          |
| cg03804136 | chr17:75368689-75370506   | SEPTIN9        |
| cg03813164 | chr10:11059443-11060524   | CELF2          |
| cg03816707 | chr20:43726298-43727372   | KCNS1          |
| cg03817667 | chr7:54609735-54610140    | VSTM2A         |
| cg03817911 | chr12:104697349-104697984 | TXNRD1         |
| cg03825010 | chr5:159399005-159399928  | ADRA1B         |
| cg03840594 | chr6:99279318-99283842    | POU3F2         |
| cg03848381 | chr15:40573629-40576118   | ANKRD63        |
| cg03853987 | chr2:101033607-101034296  | CHST1          |
| cg03858673 | chr6:28583935-28584289    | ZBED9          |
| cg03864000 | chr11:111410933-111412199 | LAYN           |
| cg03884132 | chr15:33009531-33011696   | GREM1          |
| cg03885037 | chr10:135089970-135090491 | ADAM8          |
| cg03905847 | chr10:134597358-134602649 | NKX6-2         |
| cg03929741 | chr13:107186469-107189024 | EFNB2          |
| cg03932723 | chr11:63258379-63258804   | HRASLS5        |
| cg03940848 | chr1:229542944-229543770  |                |
| cg03947459 | chr4:1685406-1686743      | FAM53A         |
| cg03957481 | chr22:50984973-50988141   | KLHDC7B        |
| cg03963198 | chr5:1881925-1887743      | IRX4           |
| cg03970036 | chr2:220173871-220174283  | PTPRN          |
| cg03976877 | chr7:158936508-158938492  | VIPR2          |
| cg04008888 | chr11:68622723-68623252   |                |
| cg04012924 | chr11:13689589-13690724   | FAR1           |
| cg04014105 | chr6:110797298-110798201  | SLC22A16       |
| cg04017533 | chr18:55019708-55021605   | ST8SIA3        |
| cg04021697 | chr1:3566446-3569636      | TP73           |
| cg04035559 | chr10:71077947-71079377   | HK1            |
| cg04037038 | chr2:183731820-183732093  |                |
| cg04065086 | chr1:151103686-151106100  | SEMA6C         |
| cg04084088 | chr19:33165267-33168099   | RGS9BP         |
| cg04085025 | chr7:30028519-30029822    | SCRN1          |
| cg04088969 | chr10:11059443-11060524   | CELF2          |
| cg04092800 | chr5:40679503-40682081    | PTGER4         |
| cg04093225 | chr1:166916866-166917215  | ILRD2          |
| cg04100696 | chr11:12029738-12030841   | DKK3           |
| cg04111064 | chr3:138663719-138666346  | FOXL2; FOXL2NB |
| cg04113200 | chr12:131303094-131303836 | STX2           |

|            |                           |             |
|------------|---------------------------|-------------|
| cg04118306 | chr8:24770909-24772547    | NEFM        |
| cg04122873 | chr6:28956107-28956578    | HCG16       |
| cg04138502 | chr3:123166219-123168567  | ADCY5       |
| cg04143876 | chr15:76638473-76639823   |             |
| cg04147049 | chr1:33219428-33220028    | KIAA1522    |
| cg04148762 | chr1:203598472-203598853  | ATP2B4      |
| cg04166294 | chr16:54317822-54324604   | IRX3        |
| cg04167239 | chr4:3767073-3769789      | ADRA2C      |
| cg04167595 | chr8:11555100-11555603    | GATA4       |
| cg04176888 | chr19:41595896-41596140   | CYP2A13     |
| cg04177426 | chrX:150863180-150864078  | PRRG3       |
| cg04184836 | chr15:83315117-83317541   | CPEB1       |
| cg04188273 | chr4:110222971-110224257  | COL25A1     |
| cg04192867 | chr10:93647053-93647393   |             |
| cg04203238 | chr4:16084196-16085735    | PROM1       |
| cg04209650 | chr17:19648140-19648492   | ALDH3A1     |
| cg04217778 | chr7:5111621-5112088      | RBAK-RBAKDN |
| cg04221886 | chr2:44058766-44059232    | ABCG5       |
| cg04223420 | chr5:134363093-134365146  | PITX1       |
| cg04224064 | chr14:36991595-36992488   | NKX2-1-AS1  |
| cg04235837 | chr3:13114628-13115245    |             |
| cg04245057 | chr17:59473061-59483266   | TBX2        |
| cg04246763 | chr1:87617693-87617986    | LINC01140   |
| cg04265797 | chr14:38678246-38680937   | SSTR1       |
| cg04281464 | chr14:70014544-70014993   |             |
| cg04283162 | chr15:29862036-29863649   | FAM189A1    |
| cg04285275 | chr16:31548738-31549184   |             |
| cg04293085 | chr20:4202149-4202765     | ADRA1D      |
| cg04293902 | chr10:134597358-134602649 | NKX6-2      |
| cg04299389 | chr20:25128765-25129610   | LOC284798   |
| cg04316624 | chr2:177036255-177037213  | HOXD3       |
| cg04317962 | chr16:79623492-79623957   |             |
| cg04321866 | chr13:107186469-107189024 | EFNB2       |
| cg04324758 | chr19:16435203-16438064   | KLF2        |
| cg04328413 | chr19:59049779-59050304   | ZBTB45      |
| cg04332534 | chr19:37095681-37096589   | ZNF382      |
| cg04337653 | chr6:100905445-100905697  | SIM1        |
| cg04344565 | chr8:140714586-140718259  | KCNK9       |
| cg04359418 | chr10:76573196-76573507   |             |
| cg04361852 | chr11:73693703-73694802   | UCP2        |
| cg04362586 | chr2:45231782-45232550    | SIX2        |
| cg04363624 | chr1:47696505-47698197    | TAL1        |
| cg04365224 | chr3:72788073-72788416    |             |
| cg04369341 | chr20:42543098-42545137   | TOX2        |
| cg04380519 | chr17:61776891-61778733   | LOC729683   |
| cg04384626 | chr4:41882451-41882964    | LINC00682   |
| cg04386144 | chr6:43970074-43970922    | c6orf223    |
| cg04395369 | chr19:19738573-19739821   | LPAR2       |
| cg04407470 | chr6:108485672-108490539  | NR2E1       |
| cg04408595 | chr3:71802561-71804209    | EIF4E3      |

|            |                          |              |
|------------|--------------------------|--------------|
| cg04415176 | chr2:176957055-176958279 | HOXD13       |
| cg04425920 | chr10:50602990-50606783  | DRGX         |
| cg04426311 | chr3:3840514-3842772     | LRRN1        |
| cg04431629 | chr1:50884229-50891471   | DMRTA2       |
| cg04431946 | chr2:47796924-47799166   | KCNK12       |
| cg04442576 | chr6:118228043-118229811 | SLC35F1      |
| cg04453180 | chr5:140855387-140856620 | PCDHGA1      |
| cg04460984 | chr15:78933188-78933821  | CHRNB4       |
| cg04467162 | chr3:128764541-128766055 |              |
| cg04481779 | chr6:137365300-137366126 | IL20RA       |
| cg04487931 | chr1:28199032-28199257   | THEMIS2      |
| cg04495670 | chr11:69632034-69634710  | FGF3         |
| cg04497176 | chr19:34972055-34973645  | WTIP         |
| cg04502985 | chr5:77268351-77268787   |              |
| cg04508482 | chr4:995483-997541       | IDUA         |
| cg04515001 | chr6:24357720-24358309   | DCDC2; KAAG1 |
| cg04515996 | chr6:85472703-85474132   | TBX18        |
| cg04528060 | chr4:57371583-57372022   | ARL9         |
| cg04532033 | chr3:157822974-157823836 | SHOX2        |
| cg04547675 | chr11:13984067-13986349  | SPON1        |
| cg04550737 | chr1:119529820-119530712 | TBX15        |
| cg04552470 | chr1:20669567-20670018   | VWA5B1       |
| cg04557125 | chr4:41883493-41884570   | LINC00682    |
| cg04564920 | chr3:122296613-122296828 | PARP15       |
| cg04573550 | chr14:38678246-38680937  | SSTR1        |
| cg04580344 | chr6:127796287-127797356 | SOGA3        |
| cg04590978 | chr10:97802872-97804262  | ENTPD1-AS1   |
| cg04595393 | chrX:102000690-102001558 | BHLHB9       |
| cg04597433 | chr4:9783036-9784960     | DRD5         |
| cg04599403 | chr5:926587-927401       |              |
| cg04600618 | chr6:43612715-43613366   | RSPH9        |
| cg04609245 | chr4:41646293-41646582   | LIMCH1       |
| cg04612444 | chr8:57358127-57359415   | PENK         |
| cg04618002 | chr7:5632336-5634555     | FSCN1        |
| cg04618333 | chr17:46800534-46800746  | PRAC2        |
| cg04621893 | chr10:22623351-22625875  |              |
| cg04638468 | chr4:122685861-122686565 | TMEM155      |
| cg04645150 | chr6:28583935-28584289   | ZBED9        |
| cg04645914 | chr19:52452317-52452543  | ZNF350-AS1   |
| cg04651781 | chr4:1396292-1401730     | NKX1-1       |
| cg04652621 | chr7:150671807-150672370 | KCNH2        |
| cg04654530 | chr2:63282515-63283122   | OTX1         |
| cg04669574 | chr12:50297581-50297988  | FAIM2        |
| cg04673590 | chr7:27135343-27136736   | HOTAIRM1     |
| cg04686953 | chr4:1107126-1107728     | RNF212       |
| cg04701034 | chr14:52534582-52536722  | NID2         |
| cg04707408 | chr7:27231806-27233097   |              |
| cg04710571 | chr19:38852312-38853485  | CATSPERG     |
| cg04738965 | chr3:147126989-147128999 | ZIC1         |
| cg04742135 | chr4:1800145-1800351     | FGFR3        |

|            |                           |                      |
|------------|---------------------------|----------------------|
| cg04743654 | chr3:50377804-50378540    | RASSF1               |
| cg04751631 | chr7:149916641-149918264  |                      |
| cg04759439 | chr3:56502612-56502815    |                      |
| cg04766371 | chr10:43857487-43858205   |                      |
| cg04778012 | chr7:99774734-99775583    | STAG3                |
| cg04779720 | chr1:11919116-11919555    |                      |
| cg04781274 | chr16:67034471-67035340   | CES4A                |
| cg04784471 | chr16:2765620-2765855     | PRSS27               |
| cg04786287 | chr16:54970302-54972846   |                      |
| cg04786857 | chr2:29033352-29034011    | SPDYA                |
| cg04787024 | chr2:99552186-99553831    | KIAA1211L            |
| cg04792712 | chr8:17270604-17271120    | MTMR7                |
| cg04797323 | chr12:93963964-93967395   | SOCS2                |
| cg04804877 | chr12:3862069-3862606     | CRACR2A              |
| cg04805181 | chr15:66914242-66914884   | LINC01169            |
| cg04805619 | chr3:167097928-167098198  | ZBBX                 |
| cg04819499 | chr17:43044370-43046424   | C1QL1                |
| cg04819760 | chr10:22764709-22767050   |                      |
| cg04823311 | chr7:28995306-28998541    | TRIL                 |
| cg04837832 | chr10:101290626-101291178 | LINC01475            |
| cg04839289 | chr14:24044887-24046760   | JPH4                 |
| cg04863005 | chr1:59042014-59043295    | TACSTD2              |
| cg04863892 | chr7:27182614-27185562    | HOXA-AS3             |
| cg04864807 | chr2:121411984-121412315  |                      |
| cg04878000 | chr1:32237828-32238661    |                      |
| cg04895288 | chr7:98099883-98100289    |                      |
| cg04907523 | chr1:213123648-213125092  | VASH2                |
| cg04917181 | chr8:98289605-98290404    | LOC101927066         |
| cg04920358 | chr8:49468684-49468959    | LOC101929268         |
| cg04920951 | chr11:67350929-67351953   | GSTP1                |
| cg04957628 | chr6:137242316-137245442  | SLC35D3              |
| cg04970117 | chr3:45837481-45838256    | SLC6A20              |
| cg04972745 | chr10:101287163-101287920 | LINC01475            |
| cg04974290 | chr17:5000370-5001205     |                      |
| cg04981611 | chr2:47796924-47799166    | MSH2                 |
| cg04991805 | chr10:99789615-99791320   | CRTAC1               |
| cg04992127 | chr5:2748369-2757024      | IRX2; C5orf38        |
| cg04992638 | chr17:43339125-43339832   | SPATA32; MAP3K14-AS1 |
| cg04998420 | chr1:153508425-153508840  | S100A6               |
| cg05012676 | chr16:88564053-88564394   | ZFPM1                |
| cg05020604 | chr19:37095681-37096589   | ZNF382; ZNF529       |
| cg05022673 | chr6:56818874-56820308    | DST; BEND6           |
| cg05036656 | chr4:41875446-41875794    |                      |
| cg05040544 | chr13:107186469-107189024 | EFNB2                |
| cg05045981 | chr7:129418287-129422509  |                      |
| cg05052633 | chr17:29248848-29249926   | ADAP2                |
| cg05053327 | chr17:40837023-40837525   | CNTNAP1              |
| cg05057720 | chr14:38724255-38725537   | CLEC14A              |
| cg05057910 | chr7:27260102-27260467    |                      |
| cg05062087 | chr8:145806259-145806713  | ARHGAP39             |

|            |                          |                |
|------------|--------------------------|----------------|
| cg05065507 | chr1:59042014-59043295   | TACSTD2        |
| cg05068987 | chr19:12978360-12978785  | MAST1          |
| cg05071046 | chr16:54325041-54325703  |                |
| cg05080154 | chr18:76737006-76741244  | SALL3          |
| cg05085230 | chr6:133562087-133563586 | EYA4           |
| cg05095158 | chr11:13030331-13032584  | RASSF10        |
| cg05099508 | chr10:22634001-22634862  | SPAG6          |
| cg05106897 | chr6:34433412-34434371   | PACSN1         |
| cg05107535 | chr16:3242623-3242912    | OR1F1          |
| cg05118482 | chr16:23193717-23194773  | SCNN1G         |
| cg05136263 | chr2:45235512-45237792   | SIX2           |
| cg05152874 | chrX:50556225-50557179   | SHROOM4        |
| cg05158615 | chr7:24323559-24325080   | NPY            |
| cg05166490 | chr8:41753341-41755250   | ANK1           |
| cg05180443 | chr17:48545571-48546900  | ACSF2; CHAD    |
| cg05183931 | chr11:17717506-17717767  | LINC02729      |
| cg05184456 | chr8:145555343-145562310 | SCRT1          |
| cg05184938 | chr17:75368689-75370506  | SEPTIN9        |
| cg05196969 | chr15:76627524-76627838  |                |
| cg05201970 | chr5:45695395-45696510   | HCN1           |
| cg05211768 | chr15:91427541-91427905  | FES            |
| cg05233128 | chr19:3659642-3659949    | PIP5K1C        |
| cg05233674 | chr6:34433412-34434371   | PACSN1         |
| cg05237485 | chr8:11555100-11555603   | GATA4          |
| cg05270634 | chr17:41177337-41177593  | RND2           |
| cg05297854 | chr22:50623165-50625226  | TRABD          |
| cg05306745 | chr17:76920685-76921961  | TIMP2          |
| cg05309948 | chr11:2290105-2292932    |                |
| cg05327835 | chr4:995483-997541       | IDUA           |
| cg05336395 | chr13:53419898-53422872  | PCDH8          |
| cg05337743 | chr19:54369388-54369809  | MYADM          |
| cg05346841 | chr1:14026482-14027200   | PRDM2          |
| cg05347898 | chr6:24357720-24358309   | DCDC2; KAAG1   |
| cg05349062 | chr2:74740456-74743795   | TLX2           |
| cg05350411 | chr4:568514-570488       | TMEM271        |
| cg05352500 | chr19:34972055-34973645  | WTIP           |
| cg05353869 | chr11:75139455-75139817  | KLHL35         |
| cg05361559 | chr8:22547487-22553427   | EGR3           |
| cg05362548 | chr8:11204826-11205689   | TDH            |
| cg05364567 | chr17:5019638-5019879    | ZNF232         |
| cg05364759 | chr1:21835549-21836344   | ALPL           |
| cg05372113 | chr19:41595896-41596140  | CYP2A13        |
| cg05376374 | chr11:43602546-43603215  | MIR129-2       |
| cg05377226 | chr1:171810468-171811325 | DNM3           |
| cg05386493 | chr3:138663719-138666346 | FOXL2; FOXL2NB |
| cg05413277 | chr2:74641734-74643350   | C2orf81        |
| cg05415020 | chr6:110797298-110798201 | SLC22A16       |
| cg05436231 | chr1:27709601-27709831   | CD164L2        |
| cg05452406 | chr6:10881847-10882051   | GCM2           |
| cg05457344 | chr6:26251899-26252233   | HIST1H2BH      |

|            |                           |                         |
|------------|---------------------------|-------------------------|
| cg05475524 | chr11:66326640-66326840   | ACTN3                   |
| cg05488523 | chr17:79478236-79482426   | ACTG1                   |
| cg05490712 | chr11:31831621-31839038   | PAX6                    |
| cg05495949 | chr7:4922708-4923576      | RADIL                   |
| cg05506365 | chr2:105468852-105473488  | POU3F3                  |
| cg05514256 | chr2:45231782-45232550    | SIX2                    |
| cg05519781 | chr21:40032244-40033665   | ERG                     |
| cg05520409 | chr16:1029879-1035327     | LMF1; SOX8              |
| cg05527869 | chr17:35291900-35300875   | LHX1                    |
| cg05529506 | chr18:44526867-44527137   | KATNAL2                 |
| cg05537653 | chr11:47611139-47612438   | C1QTNF4                 |
| cg05545132 | chr2:144694667-144695180  | LOC101928386            |
| cg05546863 | chr16:66612750-66613412   | KLF-CMTM1; CMTM1; CNMT  |
| cg05554936 | chr19:11450017-11450414   | RAB3D                   |
| cg05569109 | chr2:166649910-166650966  | GALNT3                  |
| cg05575054 | chr10:115803359-115805468 | ADRB1                   |
| cg05617413 | chr12:133065844-133066393 |                         |
| cg05618934 | chr4:1407447-1408014      |                         |
| cg05621343 | chr11:134145560-134147180 | GLB1L3                  |
| cg05627083 | chr18:10454454-10455268   | APCDD1                  |
| cg05629186 | chr6:27356493-27357020    | ZNF391                  |
| cg05639679 | chr1:33219428-33220028    | KIAA1522                |
| cg05661282 | chr19:58220190-58220517   | ZNF154                  |
| cg05663341 | chr7:96634623-96634915    | DLX6-AS1                |
| cg05675373 | chr1:110752257-110754794  | KCNC4                   |
| cg05684891 | chr9:124460968-124461361  | DAB2IP                  |
| cg05686497 | chr5:127872564-127874945  | FBN2                    |
| cg05697849 | chr1:50513645-50514320    | ELAVL4                  |
| cg05711235 | chr8:65498604-65498828    |                         |
| cg05714219 | chr2:31360322-31361821    | GALNT14                 |
| cg05720261 | chr1:40105011-40105707    | HEYL                    |
| cg05721365 | chr17:62774367-62777797   | BPTFP1-KPNA2P3; ARHGAP2 |
| cg05732750 | chr7:6703504-6704075      | AK123300                |
| cg05733135 | chr11:27740645-27741236   | BDNF                    |
| cg05739190 | chr10:97802872-97804262   | CCNJ; ENTPD1-AS1        |
| cg05751100 | chr6:26550783-26551114    |                         |
| cg05756489 | chr10:92616821-92618034   | HTR7                    |
| cg05766140 | chr6:391189-393790        | IRF4                    |
| cg05768427 | chr3:127633994-127634588  | KBTBD12                 |
| cg05770238 | chr1:26686517-26687281    |                         |
| cg05771369 | chr12:58021295-58022037   | B4GALNT1                |
| cg05774229 | chr11:76032912-76033392   |                         |
| cg05774978 | chr1:146649623-146649852  | CHD1L                   |
| cg05783139 | chr2:198649752-198651599  | BOLL                    |
| cg05788681 | chrX:103498707-103499843  | ESX1                    |
| cg05789704 | chr8:38965014-38965423    | ADAM32                  |
| cg05804220 | chr15:45421237-45422394   | DUOXA1; DUOX1           |
| cg05817758 | chr11:13030331-13032584   | RASSF10                 |
| cg05828690 | chr8:145751956-145756326  | C8orf82                 |
| cg05832051 | chr19:54369388-54369809   | MYADM                   |

|            |                           |                      |
|------------|---------------------------|----------------------|
| cg05835105 | chr4:111542063-111544464  | PITX2                |
| cg05843841 | chr11:76381450-76382295   | LRRC32               |
| cg05844937 | chr6:1604607-1615866      | FOXC1                |
| cg05860723 | chr12:81102035-81102716   | MYF6                 |
| cg05863502 | chr9:140771301-140773513  | LOC100133077         |
| cg05871997 | chr6:56818874-56820308    | DST; BEND6           |
| cg05884032 | chr18:76737006-76741244   | SALL3                |
| cg05904135 | chr10:134597358-134602649 | NKX6-2               |
| cg05918002 | chr17:5019051-5019551     | ZNF232; USP6         |
| cg05920961 | chr14:102247661-102248279 | PPP2R5C              |
| cg05922253 | chrX:50213659-50213983    | DGKK                 |
| cg05922610 | chr6:108495655-108495986  | NR2E1                |
| cg05928342 | chr19:9473590-9474001     | ZNF559-ZNF177        |
| cg05931423 | chr5:115697135-115697589  |                      |
| cg05933904 | chr16:1029879-1035327     | SOX8                 |
| cg05933935 | chr1:6051596-6052955      | NPHP4; KCNAB2        |
| cg05937737 | chr3:170303533-170303768  | SLC7A14; SLC7A14-AS1 |
| cg05938001 | chr2:172952810-172953160  | DLX1                 |
| cg05939970 | chr3:127794370-127796136  | RUVBL1; RUVBL1-AS1   |
| cg05945059 | chr18:56939625-56941540   | RAX                  |
| cg05962092 | chr19:49575130-49576076   | KCNA7                |
| cg05971966 | chr5:40679503-40682081    | PTGER4; TTC33        |
| cg05977669 | chr7:27225051-27225629    | HOXA11-AS            |
| cg05981335 | chr12:81102035-81102716   | MYF6                 |
| cg05983315 | chr19:58545116-58545897   | ZSCAN1               |
| cg05994148 | chr6:34433412-34434371    | PACSIN1              |
| cg06001519 | chr13:23500590-23501398   |                      |
| cg06007282 | chr2:45231212-45231482    |                      |
| cg06010020 | chr7:5111621-5112088      | RBAK-RBAKDN; RBAKDN  |
| cg06034933 | chr1:228645197-228646434  | HIST3H2A             |
| cg06036912 | chr16:3067522-3068358     | CLDN6                |
| cg06040206 | chr2:172959268-172962054  |                      |
| cg06048524 | chr10:44879715-44882391   | CXCL12               |
| cg06065125 | chr4:85402765-85403175    |                      |
| cg06073471 | chr3:101497831-101498648  | NXPE3                |
| cg06081518 | chr16:3220439-3221356     |                      |
| cg06100807 | chr15:90029932-90030328   | RHCG                 |
| cg06122660 | chr12:8025365-8025908     | SLC2A14              |
| cg06158650 | chr1:119522386-119522638  | TBX15                |
| cg06169131 | chr10:103535637-103536505 | FGF8                 |
| cg06183338 | chr5:178003624-178004247  | COL23A1              |
| cg06186698 | chr3:138663719-138666346  | FOXL2NB; FOXL2       |
| cg06188229 | chr1:226411008-226411880  | MIXL1                |
| cg06188545 | chr1:156863416-156863711  | PEAR1                |
| cg06196147 | chr3:128712405-128713058  | KIAA1257             |
| cg06211893 | chr1:171810468-171811325  | DNM3                 |
| cg06215569 | chr1:110610266-110613303  | ALX3                 |
| cg06218338 | chr7:27231806-27233097    |                      |
| cg06220235 | chr16:11348542-11350803   | SOCS1                |
| cg06223767 | chr6:391189-393790        | IRF4                 |



|            |                           |                  |
|------------|---------------------------|------------------|
| cg06226630 | chr4:48492118-48493589    | ZAR1             |
| cg06230736 | chr10:8091375-8098329     | GATA3; GATA3-AS1 |
| cg06239355 | chr5:32709911-32714450    | NPR3             |
| cg06241292 | chr3:49314438-49314815    | USP4             |
| cg06246357 | chr6:1524154-1524543      |                  |
| cg06263495 | chr11:2290105-2292932     | ASCL2            |
| cg06268694 | chr22:46929318-46934861   | CELSR1           |
| cg06270244 | chr15:78933188-78933821   | CHRNB4           |
| cg06275859 | chr4:1407447-1408014      |                  |
| cg06291867 | chr10:92616821-92618034   | HTR7             |
| cg06302025 | chrX:102000690-102001558  | BHLHB9           |
| cg06304097 | chr10:133109194-133111052 | TCERG1L          |
| cg06319822 | chr16:214344-216720       | HBM              |
| cg06329574 | chr11:69632034-69634710   | FGF3             |
| cg06338710 | chr1:92945908-92952609    | GFI1             |
| cg06341513 | chr11:61275826-61277329   | LRRC10B          |
| cg06346974 | chr1:65775019-65775746    | DNAJC6           |
| cg06355129 | chr1:156646293-156647260  | NES              |
| cg06365535 | chr17:59531724-59535254   | TBX4             |
| cg06366062 | chr17:30813178-30815239   | CDK5R1           |
| cg06367311 | chr16:57317968-57318964   | PLLP             |
| cg06368590 | chr8:116679699-116679936  | TRPS1            |
| cg06372962 | chr1:173638663-173639045  | ANKRD45          |
| cg06376520 | chr12:81110726-81111126   | MYF5             |
| cg06376715 | chr1:3634634-3635101      | TP73             |
| cg06377278 | chr1:25255528-25259005    | RUNX3            |
| cg06382344 | chr2:162279836-162280709  | TBR1             |
| cg06382559 | chr10:102896343-102896665 | TLX1             |
| cg06390536 | chr17:73583839-73586337   | MYO15B           |
| cg06391932 | chr2:45159894-45160112    | LINC01833        |
| cg06392169 | chr6:391189-393790        | IRF4             |
| cg06396724 | chr14:61188117-61190772   | SIX4             |
| cg06399148 | chr8:104152727-104153390  | BAALC            |
| cg06404175 | chr20:3052098-3053103     | OXT              |
| cg06425919 | chr11:17740790-17743779   | MYOD1            |
| cg06428055 | chrX:129243675-129245575  | ELF4             |
| cg06431702 | chr11:66623621-66626614   | LRFN4; PC        |
| cg06433023 | chr6:108485672-108490539  | NR2E1            |
| cg06444282 | chr1:20669567-20670018    | VWA5B1           |
| cg06445348 | chr1:166916866-166917215  | ILDR2            |
| cg06454760 | chr19:58570394-58571779   | ZNF135           |
| cg06458358 | chr8:1771362-1772760      | ARHGEF10         |
| cg06463958 | chr6:166579974-166583423  | TBXT             |
| cg06469345 | chr4:9783036-9784960      | DRD5             |
| cg06470822 | chr6:28175283-28175605    |                  |
| cg06472476 | chr19:54369388-54369809   | MYADM            |
| cg06488443 | chr2:162279836-162280709  | TBR1             |
| cg06523224 | chr15:83951981-83953930   | BNC1             |
| cg06525651 | chr10:128993506-128995167 | DOCK1            |
| cg06535115 | chr6:26550783-26551114    |                  |

|            |                           |                        |
|------------|---------------------------|------------------------|
| cg06552366 | chr2:161263872-161264460  | RBMS1                  |
| cg06558014 | chr6:100051019-100051972  |                        |
| cg06561329 | chr22:17600564-17602611   | LINC01664              |
| cg06570224 | chr3:157812054-157812764  |                        |
| cg06572160 | chr19:50831455-50832070   | KCNC3                  |
| cg06572465 | chr5:140800761-140801072  | PCDHGA1                |
| cg06575065 | chr16:68676451-68676843   |                        |
| cg06594404 | chr4:379900-380399        |                        |
| cg06598091 | chr12:11653233-11653775   |                        |
| cg06610849 | chr19:58520755-58521224   |                        |
| cg06611810 | chr19:41316544-41317318   | CYP2T1P                |
| cg06616710 | chr10:99473085-99473291   |                        |
| cg06632762 | chr1:110230239-110230614  | GSTM1                  |
| cg06644428 | chr2:233283398-233285959  |                        |
| cg06647751 | chr10:88149267-88149738   |                        |
| cg06648277 | chr10:134597358-134602649 | NKX6-2                 |
| cg06655810 | chr7:27260102-27260467    |                        |
| cg06657050 | chr15:53080459-53083699   | ONECUT1                |
| cg06665109 | chr19:54369388-54369809   | MYADM                  |
| cg06666025 | chr16:66612750-66613412   | KLF-CMTM1; CMTM1; CNMT |
| cg06673178 | chrX:50556225-50557179    | SHROOM4                |
| cg06680243 | chr14:103655242-103655928 | LINC00605              |
| cg06686029 | chr20:30777757-30778329   | TSPY26P                |
| cg06720669 | chrX:108867763-108868486  | KCNE5                  |
| cg06741043 | chr15:68870634-68871974   | CORO2B                 |
| cg06749789 | chr2:242549374-242549995  | THAP4                  |
| cg06763054 | chr8:17270604-17271120    | MTMR7                  |
| cg06769546 | chr10:134597358-134602649 | NKX6-2                 |
| cg06779449 | chr20:42543098-42545137   | TOX2                   |
| cg06782035 | chr5:16179065-16180420    | MARCH11; MARCHF11      |
| cg06782692 | chr10:134120448-134122422 | STK32C                 |
| cg06784108 | chr13:107186469-107189024 | EFNB2                  |
| cg06790860 | chr16:69760294-69760506   | NQO1                   |
| cg06793562 | chr6:85482570-85484718    |                        |
| cg06818307 | chr20:6750696-6750957     | BMP2                   |
| cg06818605 | chr7:148982080-148982675  | LOC155060; ZNF783      |
| cg06825142 | chr11:636907-640628       | DRD4                   |
| cg06829686 | chr1:47909713-47911020    |                        |
| cg06829830 | chr5:80255905-80257006    | RASGRF2-AS1            |
| cg06848185 | chr17:75368689-75370506   | SEPTIN9                |
| cg06864047 | chr7:97839863-97840222    |                        |
| cg06871074 | chr1:146551477-146551764  |                        |
| cg06893138 | chr1:228645197-228646434  | HIST3H2A               |
| cg06894334 | chr4:1396292-1401730      | NKX1-1                 |
| cg06897264 | chr6:28979247-28979499    |                        |
| cg06905692 | chr2:30142832-30144624    | ALK                    |
| cg06905726 | chr19:18209912-18210268   | MAST3                  |
| cg06907708 | chr19:18335073-18337375   | PDE4C                  |
| cg06913330 | chr4:2059929-2063181      | NAT8L                  |
| cg06917617 | chr1:207818390-207818952  | CR1L                   |

|            |                           |          |
|------------|---------------------------|----------|
| cg06921552 | chr11:69258150-69258544   |          |
| cg06922635 | chr4:57371583-57372022    | ARL9     |
| cg06933574 | chr5:134368579-134370466  | PITX1    |
| cg06936155 | chr1:91190490-91192804    |          |
| cg06943667 | chr11:12029738-12030841   | DKK3     |
| cg06947913 | chr12:50297581-50297988   | FAIM2    |
| cg06951245 | chr2:209271338-209271987  | PTH2R    |
| cg06953252 | chr1:40782221-40783145    | COL9A2   |
| cg06954658 | chr18:76737006-76741244   | SALL3    |
| cg06962177 | chr1:63782395-63790471    | FOXD3    |
| cg06962944 | chr20:42543098-42545137   | TOX2     |
| cg06966811 | chr14:57274608-57276840   | OTX2     |
| cg06973615 | chr2:175208416-175209076  |          |
| cg06982190 | chr7:27199662-27200960    |          |
| cg06984903 | chr16:73099813-73100791   |          |
| cg06992285 | chr8:99952021-99954686    | STK3     |
| cg06995920 | chr12:64061837-64062774   | DPY19L2  |
| cg07005055 | chr1:113050814-113052301  | WNT2B    |
| cg07014523 | chr20:50721311-50721912   | ZFP64    |
| cg07030339 | chr15:101419262-101421133 | ALDH1A3  |
| cg07036412 | chr6:24360030-24360411    | DCDC2    |
| cg07036524 | chr18:77557781-77558948   |          |
| cg07039560 | chr5:140683196-140683773  | SLC25A2  |
| cg07044708 | chr15:75470912-75471212   |          |
| cg07049552 | chr16:30204696-30206485   | SLX1A    |
| cg07060551 | chr19:51198144-51198460   | SHANK1   |
| cg07061260 | chr16:68676451-68676843   | CDH3     |
| cg07065111 | chr2:5831188-5831413      |          |
| cg07065220 | chr3:193987426-193987758  |          |
| cg07068756 | chr4:41258760-41259867    | UCHL1    |
| cg07071389 | chr20:30777757-30778329   | TSPY26P  |
| cg07074543 | chr3:119041383-119042255  | ARHGAP31 |
| cg07076076 | chr16:1458144-1458435     | UNKL     |
| cg07095995 | chr4:110222971-110224257  | COL25A1  |
| cg07095997 | chr14:61188117-61190772   | SIX4     |
| cg07113642 | chr20:2780979-2781497     | CPXM1    |
| cg07124687 | chr6:28956107-28956578    |          |
| cg07128416 | chr3:113160300-113160641  | WDR52    |
| cg07137955 | chr5:42992034-42992955    | AK056817 |
| cg07138355 | chr6:26550783-26551114    |          |
| cg07139509 | chr14:70038109-70040302   | CCDC177  |
| cg07149609 | chr1:170630457-170630851  | PRRX1    |
| cg07166654 | chr12:52652019-52652743   | KRT86    |
| cg07167423 | chr1:36042433-36043444    | TFAP2E   |
| cg07171111 | chr4:10462833-10463689    | ZNF518B  |
| cg07203423 | chr2:74740456-74743795    | TLX2     |
| cg07204280 | chr18:12254148-12255089   | CIDEA    |
| cg07212778 | chr2:119914127-119916663  | C1QL2    |
| cg07219542 | chr1:110210582-110210956  | GSTM2    |
| cg07230107 | chr1:224803638-224805314  | CNIH2    |

|            |                           |           |
|------------|---------------------------|-----------|
| cg07242540 | chr1:12600348-12600556    |           |
| cg07247419 | chr20:21376359-21378245   | NKX2-4    |
| cg07251711 | chr10:134597358-134602649 | NKX6-2    |
| cg07265743 | chr17:59531724-59535254   | TBX4      |
| cg07274716 | chr5:134363093-134365146  | PITX1     |
| cg07276415 | chr11:46354092-46355190   | DGKZ      |
| cg07279070 | chr2:73143056-73148260    | EMX1      |
| cg07333715 | chr11:2290105-2292932     | ASCL2     |
| cg07336350 | chr16:54317822-54324604   | IRX3      |
| cg07339783 | chr2:176952696-176953297  |           |
| cg07340580 | chr7:107301206-107302416  | SLC26A4   |
| cg07347092 | chr12:124246525-124247254 | DNAH10    |
| cg07352345 | chr5:175792356-175793505  | ARL10     |
| cg07363880 | chr16:29465354-29467143   | SLX1A     |
| cg07371589 | chr1:151103686-151106100  | SEMA6C    |
| cg07376547 | chr1:48058794-48059230    |           |
| cg07379055 | chr19:12305553-12306304   |           |
| cg07380496 | chr5:71402878-71404868    | MAP1B     |
| cg07382554 | chr18:76737006-76741244   | SALL3     |
| cg07382920 | chr1:3566446-3569636      | TP73      |
| cg07399369 | chr3:142837886-142840838  | CHST2     |
| cg07406897 | chr17:27346854-27347222   |           |
| cg07420190 | chr1:220701508-220702348  | MARK1     |
| cg07435294 | chr11:65553750-65555573   | OVOL1     |
| cg07437373 | chr3:134125488-134125871  |           |
| cg07451080 | chr3:44036408-44041104    |           |
| cg07451524 | chr10:123922851-123923542 | TACC2     |
| cg07462756 | chr4:4859633-4860191      |           |
| cg07484354 | chr5:157078328-157079564  | SOX30     |
| cg07489048 | chr14:29236836-29237832   | FOXG1     |
| cg07495363 | chr2:198649752-198651599  | BOLL      |
| cg07512361 | chr7:101943786-101944557  | SH2B2     |
| cg07513622 | chr7:18125915-18127009    | HDAC9     |
| cg07515989 | chr1:43250763-43251082    | TMEM269   |
| cg07519536 | chr6:26501726-26502107    | BTN1A1    |
| cg07519816 | chr18:53447075-53447842   | LINC01415 |
| cg07520506 | chr12:7592407-7593030     | CD163L1   |
| cg07522644 | chr6:43142014-43142217    | SRF       |
| cg07522913 | chr7:27150031-27150418    | HOXA3     |
| cg07523553 | chr11:1768980-1770712     | IFITM10   |
| cg07528613 | chr19:53073309-53074039   | ZNF701    |
| cg07533148 | chr1:248020331-248021252  | TRIM58    |
| cg07539798 | chr5:140810495-140812617  | PCDHGA1   |
| cg07540103 | chr17:6679206-6679710     | FBXO39    |
| cg07544187 | chr19:19650684-19651274   | CILP2     |
| cg07558472 | chr5:139047906-139048235  | CXXC5     |
| cg07561017 | chr12:48397890-48398731   | COL2A1    |
| cg07565505 | chr5:1881925-1887743      | IRX4      |
| cg07566169 | chr2:176973428-176973718  | HOXD11    |
| cg07570142 | chr6:132722094-132722901  | MOXD1     |

|            |                           |                      |
|------------|---------------------------|----------------------|
| cg07573209 | chr15:76630030-76630970   | ISL2                 |
| cg07584066 | chr17:57642721-57643294   | DHX40                |
| cg07586008 | chr19:49636225-49636694   | PPFIA3               |
| cg07589773 | chr7:50343758-50344519    | IKZF1                |
| cg07595776 | chr5:77253833-77254049    | LOC101929154         |
| cg07599133 | chr19:35068407-35068897   | SCGB1B2P             |
| cg07600636 | chr11:13030331-13032584   | RASSF10              |
| cg07622404 | chr3:101497831-101498648  | NXPE3                |
| cg07636117 | chr2:237071795-237078762  | GBX2                 |
| cg07641160 | chr6:117085740-117086942  | FAM162B              |
| cg07671858 | chr10:75407414-75407706   | SYNPO2L              |
| cg07687119 | chr12:54423428-54423712   | HOXC6                |
| cg07688604 | chr12:133065844-133066393 |                      |
| cg07689503 | chr2:74425445-74426423    | MTHFD2               |
| cg07696699 | chr4:17782643-17783624    | FAM184B              |
| cg07697597 | chr22:43738883-43740285   | SCUBE1               |
| cg07697895 | chr7:116962842-116964803  | WNT2                 |
| cg07702750 | chr7:28995306-28998541    | TRIL                 |
| cg07703401 | chr16:230302-231761       | HBQ1                 |
| cg07721203 | chr15:58357310-58358776   | ALDH1A2              |
| cg07723510 | chr6:30227321-30228255    | HCG17                |
| cg07766263 | chr3:170303045-170303249  | SLC7A14; SLC7A14-AS1 |
| cg07779120 | chr15:99190447-99194559   | IGF1R                |
| cg07783282 | chr12:95941907-95942979   | USP44                |
| cg07790615 | chr1:237205127-237206644  | RYR2                 |
| cg07791578 | chr6:24357720-24358309    | DCDC2                |
| cg07799366 | chr6:52226754-52228006    | PAQR8                |
| cg07800665 | chr19:21657570-21658035   |                      |
| cg07813142 | chr2:171569878-171573904  | SP5; LOC101926913    |
| cg07816687 | chr16:67196793-67199988   | FBXL8; HSF4          |
| cg07822928 | chr19:615692-623505       | HCN2                 |
| cg07835424 | chr2:200320503-200329681  | SATB2                |
| cg07844931 | chr16:58018401-58019471   | TEPP                 |
| cg07846311 | chr4:57371583-57372022    | ARL9                 |
| cg07847863 | chr13:53419898-53422872   | PCDH8                |
| cg07850527 | chr16:89267824-89268087   |                      |
| cg07850604 | chr14:36002599-36005013   | INSM2                |
| cg07852757 | chr10:64574661-64578778   | EGR2                 |
| cg07860213 | chr8:70981874-70984888    | PRDM14               |
| cg07871590 | chr7:127671159-127672853  | SND1                 |
| cg07878486 | chr19:58951215-58952250   | ZNF132               |
| cg07879739 | chr22:38220590-38221619   | GALR3                |
| cg07882671 | chr5:1881925-1887743      | IRX4                 |
| cg07888856 | chr6:137242316-137245442  | SLC35D3              |
| cg07891531 | chr16:3220439-3221356     |                      |
| cg07892597 | chr1:119531992-119532196  | TBX15                |
| cg07904475 | chr4:151500764-151501299  | LRBA                 |
| cg07920503 | chr13:25743999-25746127   | AMER2                |
| cg07926482 | chr16:84650961-84651565   | COTL1                |
| cg07931391 | chr13:100608123-100609686 | LOC101927437         |

|            |                           |                     |
|------------|---------------------------|---------------------|
| cg07936950 | chr2:172952810-172953160  | DLX1                |
| cg07938743 | chr2:63283937-63284147    | OTX1                |
| cg07943461 | chr15:32604648-32607825   | DKFZp434L187        |
| cg07951347 | chr6:27463177-27463379    |                     |
| cg07952813 | chr2:39186778-39187968    | ARHGEF33            |
| cg07960067 | chr2:9143128-9144630      | MBOAT2              |
| cg07973435 | chr6:100905445-100905697  | SIM1                |
| cg07974511 | chr2:63282515-63283122    | OTX1                |
| cg07983905 | chr20:3073225-3074232     |                     |
| cg07987843 | chr12:3308813-3310270     | TSPAN9              |
| cg07990546 | chr2:74740456-74743795    | TLX2                |
| cg07990749 | chr10:47008085-47008410   |                     |
| cg07993547 | chr19:18209912-18210268   | MAST3               |
| cg08017858 | chr11:74022429-74022703   | P4HA3               |
| cg08024029 | chr1:20669567-20670018    | VWA5B1              |
| cg08032924 | chr16:66612750-66613412   | CMTM1; CMTM2        |
| cg08034070 | chr17:40805675-40805957   |                     |
| cg08034379 | chr2:228736231-228736544  | DAW1                |
| cg08042316 | chr7:139930066-139930356  |                     |
| cg08047907 | chr1:169396622-169396869  | CCDC181             |
| cg08049853 | chr4:41875446-41875794    |                     |
| cg08065231 | chr19:9473590-9474001     | ZNF559-ZNF177       |
| cg08066943 | chr3:147136904-147137328  |                     |
| cg08074534 | chr6:100895008-100895246  | SIM1                |
| cg08074851 | chr2:47796924-47799166    | KCNK12              |
| cg08081805 | chr19:49242019-49242962   | RASIP1              |
| cg08100565 | chr3:140660335-140661602  | SLC25A36            |
| cg08101407 | chr20:30777757-30778329   | TSYP26P             |
| cg08104202 | chr1:169396622-169396869  | CCDC181             |
| cg08107689 | chr15:29033879-29034710   | LOC100289656        |
| cg08126211 | chr6:24357720-24358309    | DCDC2; KAAG1        |
| cg08136772 | chr13:53419898-53422872   | PCDH8               |
| cg08139247 | chr14:38724255-38725537   | CLEC14A             |
| cg08146483 | chr1:75601999-75602878    | LHX8                |
| cg08154437 | chr19:17007102-17008857   | CPAMD8              |
| cg08160350 | chr4:995483-997541        | IDUA                |
| cg08162372 | chr14:54420185-54422958   | BMP4                |
| cg08165971 | chr2:233791784-233793922  | NGEF                |
| cg08171351 | chr22:17600564-17602611   | CECR6               |
| cg08173692 | chr6:166720240-166722275  | PRR18               |
| cg08187418 | chr2:74425445-74426423    | MTHFD2              |
| cg08196842 | chr14:65016517-65016909   | PPP1R36             |
| cg08196968 | chr19:38746639-38747379   | PPP1R14A            |
| cg08204023 | chr5:37834672-37835128    | GDNF                |
| cg08207377 | chr19:19280999-19281560   | MEF2B; BORCS2-MEF2B |
| cg08214808 | chr11:45921388-45922167   | MAPK8IP1            |
| cg08218734 | chr10:128993506-128995167 | DOCK1               |
| cg08226111 | chr14:36002599-36005013   | INSM2               |
| cg08228715 | chr17:79894669-79895533   | PYCR1               |
| cg08231709 | chr8:99438693-99440425    | KCNS2               |

|            |                           |                      |
|------------|---------------------------|----------------------|
| cg08235864 | chr5:2748369-2757024      | IRX2; c5orf38        |
| cg08247376 | chr17:43339125-43339832   | SPATA32; MAP3K14-AS1 |
| cg08249424 | chr6:4775132-4777550      | CDYL                 |
| cg08258000 | chr19:49652213-49654260   | PPFIA3               |
| cg08258526 | chr8:49647703-49647988    | EFCAB1               |
| cg08274637 | chr13:51417372-51418149   | DLEU7; DLEU-AS1      |
| cg08289140 | chr1:1534332-1536136      | FNDC10               |
| cg08296680 | chr17:80186136-80189990   | SLC16A3              |
| cg08296831 | chr11:65553750-65555573   | OVOL1                |
| cg08303146 | chr11:2466248-2466818     | KCNQ1                |
| cg08305551 | chr19:12978360-12978785   | MAST1                |
| cg08307816 | chr14:100625320-100626461 | DEGS2                |
| cg08315202 | chr7:98245806-98247759    | NPTX2                |
| cg08328777 | chr15:45421237-45422394   | DUOXA1               |
| cg08343042 | chr2:135475699-135476993  | TMEM163              |
| cg08347183 | chr10:8091375-8098329     | GATA3                |
| cg08347500 | chr16:54315603-54316104   |                      |
| cg08350776 | chr5:54516268-54516919    | MCIDAS               |
| cg08369368 | chr5:176558853-176561652  | NSD1                 |
| cg08376141 | chr6:32116591-32117229    | PRRT1                |
| cg08382774 | chr10:134597358-134602649 | NKX6-2               |
| cg08393041 | chr3:147108512-147111703  | ZIC4                 |
| cg08404009 | chr13:109792494-109793699 | MYO16                |
| cg08407114 | chr5:36690208-36690658    |                      |
| cg08423533 | chr10:28030183-28035211   | MKX                  |
| cg08430009 | chr22:19136294-19138512   | GSC2                 |
| cg08430329 | chr2:73429284-73430647    | NOTO                 |
| cg08441806 | chr10:134597358-134602649 | NKX6-2               |
| cg08444220 | chr10:134597358-134602649 | NKX6-2               |
| cg08445802 | chr6:85482570-85484718    |                      |
| cg08452658 | chr15:83775862-83776922   | TM6SF1               |
| cg08460435 | chr1:109203594-109204378  | HENMT1               |
| cg08461949 | chr19:52104419-52104998   |                      |
| cg08464190 | chr16:49314038-49316543   | CBLN1                |
| cg08465862 | chr10:3108651-3111419     | PFKP                 |
| cg08482682 | chr11:107798959-107799980 | RAB39A               |
| cg08489324 | chrX:52004916-52005456    |                      |
| cg08493294 | chr2:25499764-25500429    | DNMT3A               |
| cg08494905 | chr6:37663762-37667102    | MDGA1                |
| cg08495115 | chr15:33009531-33011696   | GREM1                |
| cg08496953 | chr17:42733487-42734626   | MEIOC; C17orf104     |
| cg08513472 | chr6:1624186-1625468      | GMDS                 |
| cg08526991 | chr2:5831188-5831413      | LINC01248            |
| cg08538258 | chr21:46706692-46707049   | POFUT2               |
| cg08548396 | chr6:30095174-30095610    |                      |
| cg08551725 | chr7:30028519-30029822    | SCRN1                |
| cg08553437 | chr4:122685861-122686565  | TMEM155              |
| cg08555653 | chr3:138656628-138659107  | LINC01391            |
| cg08557649 | chr15:76638473-76639823   |                      |
| cg08558397 | chr7:751713-752150        | PRKAR1B              |

|            |                           |                    |
|------------|---------------------------|--------------------|
| cg08572611 | chr7:100253783-100254150  | ACTL6B             |
| cg08578136 | chr2:207139337-207140031  | ZDBF2              |
| cg08582356 | chr8:86350766-86351196    | CA3                |
| cg08584627 | chr2:98703355-98703889    | VWA3B              |
| cg08592305 | chr19:12978360-12978785   | MAST1              |
| cg08607018 | chr19:31839636-31843049   | TSHZ3              |
| cg08613144 | chr2:133426653-133428870  | LYPD1              |
| cg08616702 | chr6:108485672-108490539  | NR2E1              |
| cg08631504 | chr15:89942593-89943853   | LOC105371031       |
| cg08632164 | chr7:65970023-65971421    |                    |
| cg08637618 | chr7:27278946-27279469    |                    |
| cg08640609 | chr1:7764594-7765856      | CAMTA1             |
| cg08640634 | chr6:108485672-108490539  | NR2E1              |
| cg08655589 | chr3:14443630-14444577    | SLC6A6             |
| cg08681432 | chr16:23193717-23194773   | SCNN1G             |
| cg08682544 | chr16:66638255-66639561   | CMTM3              |
| cg08690859 | chr2:200333688-200334172  | SATB2; SATB2-AS1   |
| cg08694014 | chr16:68480865-68482822   | SMPD3              |
| cg08701621 | chr19:58570394-58571779   | ZNF135             |
| cg08703872 | chr1:151812254-151812525  | C2CD4D; C2CD4D-AS1 |
| cg08706670 | chr8:99438693-99440425    | KCNS2              |
| cg08714590 | chr7:90893568-90896683    | FZD1               |
| cg08734647 | chr16:1921898-1922426     | MEIOB              |
| cg08741214 | chr2:74425445-74426423    | MTHFD2             |
| cg08749305 | chr6:106441987-106442912  |                    |
| cg08753373 | chr10:133998913-134001500 | DPYSL4             |
| cg08763705 | chr5:139525538-139526227  |                    |
| cg08768852 | chr3:69591012-69592050    | FRMD4B             |
| cg08772752 | chr3:48631883-48632901    | COL7A1             |
| cg08777316 | chr5:158531376-158531648  | LINC02202          |
| cg08781140 | chr17:73583839-73586337   | MYO15B             |
| cg08789053 | chr6:28979247-28979499    |                    |
| cg08793877 | chr2:71115928-71116412    | LINC01143          |
| cg08812897 | chrX:20284128-20286811    | RPS6KA3            |
| cg08827307 | chr8:38965014-38965423    | ADAM32             |
| cg08832624 | chr7:98099883-98100289    |                    |
| cg08832906 | chr7:139208443-139209069  | CLEC2L             |
| cg08833577 | chr10:118899248-118900329 |                    |
| cg08844848 | chr3:3840514-3842772      | LRRN1              |
| cg08848774 | chr17:43047548-43047954   |                    |
| cg08854306 | chr4:91048412-91049682    | CCSER1             |
| cg08857144 | chr2:70994448-70995385    | ADD2               |
| cg08858437 | chr3:142837886-142840838  | CHST2              |
| cg08862890 | chr5:169064271-169064702  | DOCK2              |
| cg08863953 | chr10:22540708-22542739   | LOC100130992       |
| cg08871855 | chr2:88751336-88752865    | FOXI3              |
| cg08876434 | chr11:13030331-13032584   | RASSF10            |
| cg08890418 | chr1:21043833-21044771    | KIF17              |
| cg08892600 | chr1:223536843-223538628  | SUSD4              |
| cg08892705 | chr15:99645031-99646444   | SYNM               |



|            |                           |                              |
|------------|---------------------------|------------------------------|
| cg08894761 | chr2:31805294-31806403    | SRD5A2                       |
| cg08902977 | chr16:57317968-57318964   | PLL2                         |
| cg08934846 | chr16:3067522-3068358     | CLDN6                        |
| cg08938584 | chr5:140797163-140797701  | 2,3,4,5,6,7,8,9,10; PCDHGB1, |
| cg08940787 | chr17:62774367-62777797   | PTFP1-KPNA2P3 y ARHGAP2      |
| cg08949408 | chr10:16561605-16563822   | C1QL3                        |
| cg08956724 | chr16:29624388-29625391   | SMG1P2                       |
| cg08964780 | chr7:27208872-27209616    | HOXA10-HOXA9; HOXA10-AS      |
| cg08988797 | chr8:102505513-102506430  | GRHL2                        |
| cg08992305 | chr4:165878037-165878446  | FAM218A                      |
| cg09011231 | chr2:133013778-133015740  | ANKRD30BL                    |
| cg09024126 | chr4:16084196-16085735    | PROM1                        |
| cg09053680 | chr10:135043222-135044560 | UTF1                         |
| cg09054633 | chr5:136834017-136835146  | SPOCK1                       |
| cg09059319 | chr8:99985734-99986983    |                              |
| cg09062550 | chr20:20344401-20350605   | INSM1                        |
| cg09082903 | chr4:164252955-164253471  | NPY1R                        |
| cg09090724 | chr3:132756986-132757895  | TMEM108                      |
| cg09118312 | chr12:21810489-21810766   | LDHB                         |
| cg09142313 | chr5:72676121-72678421    |                              |
| cg09149648 | chr20:44642095-44642406   | MMP9; SLC12A5-AS1            |
| cg09151754 | chr17:5019051-5019551     | ZNF232; USP6                 |
| cg09163958 | chr1:213123648-213125092  | VASH2                        |
| cg09172548 | chr12:3862069-3862606     | CRACR2A; EFCAB4B             |
| cg09177106 | chr11:69451137-69458596   | CCND1                        |
| cg09187505 | chr6:106433985-106434459  |                              |
| cg09187933 | chr12:127630512-127631199 |                              |
| cg09193347 | chr15:79381805-79384209   | RASGRF1                      |
| cg09200738 | chr15:30864783-30865586   | ULK4P2                       |
| cg09224821 | chr17:80329067-80330208   |                              |
| cg09229918 | chr16:2041826-2043026     | SYNGR3                       |
| cg09232937 | chr5:3594468-3603054      | IRX1                         |
| cg09233013 | chr16:66638255-66639561   | CMTM3                        |
| cg09236163 | chr15:81426500-81426702   | CFAP161; C15orf26            |
| cg09241929 | chr20:57463653-57467739   | GNAS                         |
| cg09248054 | chr1:967967-970238        | AGRN                         |
| cg09252528 | chr19:42901017-42901375   | LIPE-AS1                     |
| cg09253581 | chr19:44302666-44303176   | LYPD5                        |
| cg09257635 | chr1:228345378-228346700  | GJC2                         |
| cg09258813 | chr8:37822487-37824008    | ADRB3                        |
| cg09260089 | chr10:134597358-134602649 | NKX6-2                       |
| cg09270675 | chr6:56818874-56820308    | DST y BEND6                  |
| cg09275704 | chr16:54316904-54317149   |                              |
| cg09279988 | chr3:196255496-196256013  |                              |
| cg09323727 | chr2:176936247-176936809  |                              |
| cg09336406 | chr2:20068429-20068907    | LINC00954                    |
| cg09341491 | chr16:50707292-50708041   | SNX20                        |
| cg09341793 | chr14:94405236-94406170   | ASB2                         |
| cg09344183 | chr2:175204844-175207553  |                              |
| cg09371281 | chr9:8857486-8858708      | PTPRD                        |

|            |                           |                             |
|------------|---------------------------|-----------------------------|
| cg09374293 | chr21:48081242-48081849   | PRMT2                       |
| cg09374949 | chr19:18543829-18549161   | ISYNA1; SSBP4               |
| cg09392940 | chr2:109744586-109746833  | SH3RF3; SH3RF3-AS1          |
| cg09403666 | chr10:23461301-23461610   |                             |
| cg09418984 | chr19:54369388-54369809   | MYADM                       |
| cg09420439 | chr7:27135343-27136736    | HOTAIRM1                    |
| cg09422450 | chr16:79623492-79623957   |                             |
| cg09433135 | chr19:46001831-46002686   | PPM1N                       |
| cg09461837 | chr7:3341451-3341733      | SDK1                        |
| cg09465698 | chr5:140787448-140788044  | PCDHGA1                     |
| cg09472203 | chr15:83378008-83379068   | AP3B2                       |
| cg09476130 | chr1:159869902-159870143  | CFAP45; CCDC19              |
| cg09480047 | chr16:54325041-54325703   |                             |
| cg09484039 | chr2:183730809-183731357  | FRZB                        |
| cg09489306 | chr19:44203559-44203987   |                             |
| cg09489445 | chr19:12203029-12203503   | ZNF788P                     |
| cg09492451 | chr16:54962423-54967805   | IRX5; CRNDE                 |
| cg09493505 | chr7:49813009-49815752    | VWC2                        |
| cg09504320 | chr1:157164539-157165135  |                             |
| cg09511896 | chr1:228246632-228247197  | WNT3A                       |
| cg09515953 | chr19:38746639-38747379   | PPP1R14A                    |
| cg09523275 | chr6:28226980-28227483    | NKAPL                       |
| cg09534159 | chr4:10458130-10459353    | ZNF518B                     |
| cg09537620 | chr11:31825744-31826967   | PAX6                        |
| cg09554951 | chr11:2890389-2891337     | KCNQ1DN                     |
| cg09556826 | chr6:28956107-28956578    | HCG15                       |
| cg09557462 | chr8:26721643-26724566    | ADRA1A                      |
| cg09567439 | chr15:60296136-60298520   | FOXB1                       |
| cg09570682 | chr6:106429112-106429772  |                             |
| cg09578475 | chr19:9473590-9474001     | ZNF559-ZNF177               |
| cg09614300 | chr10:124894076-124897366 | HMX3                        |
| cg09614653 | chr10:22540708-22542739   | LOC100130992                |
| cg09616463 | chr15:72611947-72612802   | CELF6                       |
| cg09617579 | chr11:82443436-82444976   | FAM181B                     |
| cg09635053 | chr16:1029879-1035327     | LMF1 y SOX8                 |
| cg09636525 | chr4:7052318-7052613      | TADA2B                      |
| cg09639151 | chr5:140810495-140812617  | 4,5,6,7,8,9,10,11,12; PCDHG |
| cg09642925 | chr2:114260096-114261794  |                             |
| cg09645574 | chr6:42879280-42879623    |                             |
| cg09649610 | chr1:235811842-235814066  | GNG4                        |
| cg09652652 | chr3:194406441-194409045  | FAM43A                      |
| cg09654997 | chr11:46259265-46260048   |                             |
| cg09655666 | chr17:34819845-34820754   |                             |
| cg09656389 | chr11:31839364-31839813   | PAX6-AS1; PAX6              |
| cg09656848 | chr11:61275826-61277329   | LRRC10B                     |
| cg09661010 | chr10:73846807-73848233   | SPOCK2                      |
| cg09661370 | chr7:27225051-27225629    | HOXA11-AS1                  |
| cg09667001 | chr17:60214776-60216785   |                             |
| cg09686443 | chr3:126113548-126113967  | CFAP100; CCDC37-DT          |
| cg09691340 | chr17:42402788-42403266   |                             |

|            |                           |                        |
|------------|---------------------------|------------------------|
| cg09695735 | chr17:58498712-58499332   |                        |
| cg09700085 | chr3:45837481-45838256    | SLC6A20                |
| cg09737314 | chr17:6898821-6900427     | ALOX12; ALOX12-AS1     |
| cg09753657 | chr1:159869902-159870143  | CFAP45; CCDC19         |
| cg09754845 | chr7:1408517-1408878      |                        |
| cg09761040 | chr19:13208344-13210525   | LYL1; NFIX             |
| cg09765089 | chr7:27291120-27292197    |                        |
| cg09768093 | chr1:32930501-32931061    | ZBTB8B                 |
| cg09774842 | chr20:3052098-3053103     | OXT                    |
| cg09775582 | chr17:45810590-45811388   | TBX21                  |
| cg09785344 | chr15:101389733-101390260 | LOC105369201           |
| cg09792926 | chr16:49314038-49316543   | CBLN1                  |
| cg09793584 | chr1:156390404-156391581  | C1orf61                |
| cg09799983 | chr2:38301277-38304518    | CYP1B1; CYP1B1-AS1     |
| cg09812070 | chr4:46995129-46995872    | GABRA4                 |
| cg09813525 | chr13:53419898-53422872   | PCDH8                  |
| cg09827761 | chr15:66947361-66947574   | LINC01169              |
| cg09848789 | chr1:85462586-85463435    | MCOLN2                 |
| cg09849405 | chr16:66612750-66613412   | KLF-CMTM1; CMTM1; CNMT |
| cg09851951 | chr16:54317822-54324604   | IRX3                   |
| cg09854734 | chr16:66612750-66613412   | KLF-CMTM1; CMTM1; CNMT |
| cg09858188 | chr7:156810573-156814593  |                        |
| cg09866102 | chr16:31213567-31214287   | PYCARD-AS1; PYCARD     |
| cg09868451 | chr2:74425445-74426423    | MTHFD2                 |
| cg09871079 | chr1:33358470-33359449    | HPCA                   |
| cg09885735 | chr15:60296136-60298520   | FOXB1                  |
| cg09887059 | chr12:113916434-113916717 | LHX5-AS1               |
| cg09894698 | chr11:2290105-2292932     | ASCL2                  |
| cg09907936 | chr19:58570394-58571779   | ZNF135                 |
| cg09921610 | chr4:41258760-41259867    | UCHL1                  |
| cg09935388 | chr1:92945908-92952609    | GFI1                   |
| cg09938462 | chr22:19705511-19706557   | SEPTIN5; SEPT5-GP1BB   |
| cg09940032 | chr8:142215692-142216299  |                        |
| cg09952395 | chr11:63258379-63258804   | HRASLS5                |
| cg09969277 | chr15:89920794-89922768   | MIR9-3HG               |
| cg09979478 | chr8:145925411-145926101  |                        |
| cg09980058 | chr19:18898229-18898449   | COMP                   |
| cg09992116 | chr10:71077947-71079377   | HK1                    |
| cg10000952 | chr11:116450660-116451912 |                        |
| cg10013716 | chr3:179168736-179169593  | GNB4                   |
| cg10023272 | chr1:110610266-110613303  | ALX3                   |
| cg10034364 | chr13:28491489-28492518   |                        |
| cg10034890 | chr2:230578063-230579981  | DNER                   |
| cg10043865 | chr17:35291900-35300875   | LHX1 y LHX1-DT         |
| cg10056132 | chr10:50887566-50887862   | C10orf53               |
| cg10064339 | chr11:73693703-73694802   | UCP2                   |
| cg10084644 | chr7:99774734-99775583    | STAG3                  |
| cg10091335 | chr10:43332388-43332817   |                        |
| cg10091994 | chr12:4378367-4382222     | CCND2; CCND2-AS1       |
| cg10094078 | chr19:1465207-1471241     | APC2                   |

|            |                           |                              |
|------------|---------------------------|------------------------------|
| cg10106804 | chr1:35258565-35258791    | GJA4                         |
| cg10113101 | chr7:30028519-30029822    | SCRN1                        |
| cg10119082 | chr7:98990158-98990922    | ARPC1B                       |
| cg10122865 | chr2:63283937-63284147    | OTX1                         |
| cg10132208 | chr19:58545116-58545897   | ZSCAN1                       |
| cg10154122 | chr19:38754847-38755699   | SPINT2                       |
| cg10162691 | chr17:41177337-41177593   | RND2                         |
| cg10168149 | chr2:200335498-200336413  | SATB2; SATB2-AS1             |
| cg10169241 | chr19:1465207-1471241     | APC2                         |
| cg10171347 | chr10:134597358-134602649 | NKX6-2                       |
| cg10171448 | chr10:134597358-134602649 | NKX6-2                       |
| cg10181419 | chr2:263401-265238        | chr2:263401-265238           |
| cg10182697 | chr10:134597358-134602649 | NKX6-2                       |
| cg10184889 | chr8:86350766-86351196    | CA3                          |
| cg10188823 | chr22:29875920-29877242   | NEFH                         |
| cg10191210 | chr5:42992034-42992955    |                              |
| cg10192893 | chr4:41747509-41747944    | PHOX2B                       |
| cg10222027 | chr16:31580560-31581023   | YBX3P1                       |
| cg10253847 | chr6:28226980-28227483    | NKAPL; ZKSCAN4               |
| cg10269548 | chr4:53728038-53729000    | RASL11B                      |
| cg10276465 | chr22:42470036-42470669   | PHETA2                       |
| cg10277651 | chr20:623089-623398       |                              |
| cg10290276 | chr11:2290105-2292932     | ASCL2                        |
| cg10297491 | chr10:11059443-11060524   | CELF2                        |
| cg10304922 | chr12:133065844-133066393 |                              |
| cg10333808 | chr12:22486836-22488666   | ST8SIA1                      |
| cg10334767 | chr4:10458130-10459353    | ZNF518B                      |
| cg10344081 | chr4:76555367-76556079    | CDKL2                        |
| cg10347032 | chr3:183542497-183543804  | MAP6D1                       |
| cg10355837 | chr17:64961008-64962321   | CACNG4                       |
| cg10356613 | chr17:35291900-35300875   | LHX1; LHX1-DT                |
| cg10363661 | chr16:89641054-89643415   | CPNE7                        |
| cg10374084 | chr19:50666148-50666514   | IZUMO2                       |
| cg10375078 | chr10:22623351-22625875   |                              |
| cg10376598 | chr19:19738573-19739821   | LPAR2                        |
| cg10379890 | chr6:391189-393790        | IRF4                         |
| cg10386298 | chr1:221050449-221050864  | HLX-AS1                      |
| cg10387890 | chr1:47489227-47489633    | CYP4X1                       |
| cg10389229 | chr12:66582696-66583345   | IRAK3                        |
| cg10397440 | chr8:57358127-57359415    | PENK                         |
| cg10409981 | chr8:99984585-99985072    |                              |
| cg10420161 | chr10:102899823-102900263 | TLX1NB                       |
| cg10428938 | chr7:98990158-98990922    | ARPC1B                       |
| cg10429922 | chr15:33009531-33011696   | GREM1                        |
| cg10435816 | chr5:140797163-140797701  | 2,3,4,5,6,7,8,9,10; PCDHGB1, |
| cg10451772 | chr3:127347683-127348859  | PODXL2                       |
| cg10454246 | chr4:41883493-41884570    | LINC00682                    |
| cg10479082 | chr7:28995306-28998541    | TRIL                         |
| cg10480343 | chr15:48936811-48938577   | FBN1                         |
| cg10481660 | chr7:155246391-155251955  | EN2                          |

|            |                           |                      |
|------------|---------------------------|----------------------|
| cg10485664 | chr7:121945346-121946235  | FEZF; FEZF-AS1       |
| cg10501093 | chr14:103593235-103593923 | TNFAIP2              |
| cg10505257 | chr16:4731562-4731835     | MGRN1                |
| cg10507275 | chr3:3840514-3842772      | LRRN1                |
| cg10508760 | chr1:166853254-166853790  |                      |
| cg10511618 | chr4:113435899-113438002  | NEUROG2; NEUROG2-AS1 |
| cg10521852 | chr19:19738573-19739821   | LPAR2                |
| cg10523966 | chr1:39956425-39958137    | BMP8A                |
| cg10530851 | chr14:37049334-37051726   | NKX2-8               |
| cg10530883 | chr5:3594468-3603054      | IRX1                 |
| cg10534507 | chr15:82335473-82339937   | MEX3B                |
| cg10541864 | chr4:174450047-174451469  | HAND2; HAND2-AS1     |
| cg10546219 | chr17:29335398-29336452   |                      |
| cg10555583 | chr20:1783825-1784552     |                      |
| cg10556064 | chr16:68480865-68482822   | SMPD3                |
| cg10572355 | chr1:119549145-119551320  |                      |
| cg10572969 | chr11:13689589-13690724   | FAR1; FAR1-IT1       |
| cg10573386 | chr3:48698336-48701667    | CELSR3               |
| cg10581449 | chrX:51238707-51240104    | NUDT11               |
| cg10583297 | chr15:45421237-45422394   | DUOXA1; DUOX1        |
| cg10598034 | chr19:53073309-53074039   | ZNF701               |
| cg10599693 | chr2:24300061-24300294    | FAM228B; SF3B6       |
| cg10601287 | chr11:119293321-119293943 | THY1; USP2-AS1       |
| cg10603275 | chr3:238392-240140        | CHL1; CHL1-AS2       |
| cg10605681 | chr6:30227321-30228255    | HLA-L; HCG17         |
| cg10608596 | chr19:11785043-11785282   | ZNF833P              |
| cg10611186 | chr17:30813178-30815239   | CDK5R1               |
| cg10617909 | chr5:180527369-180528782  |                      |
| cg10623840 | chr3:194406441-194409045  | FAM43A               |
| cg10633601 | chr1:47696505-47698197    | TAL1                 |
| cg10634619 | chr1:3662964-3664085      | TP73-AS1             |
| cg10635122 | chr19:52390842-52391368   | ZNF577; ZNF649-AS1   |
| cg10637512 | chr15:99645031-99646444   | SYNM                 |
| cg10659805 | chr7:96631384-96631800    | DLX6-AS1             |
| cg10659886 | chr19:58629310-58630241   | ZSCAN18              |
| cg10695848 | chr12:48206722-48207126   | HDAC7                |
| cg10700424 | chr11:134201785-134202407 | GLB1L2               |
| cg10703826 | chr1:119531992-119532196  | TBX15                |
| cg10715223 | chr8:101661672-101662022  | SNX31                |
| cg10715425 | chr1:6051596-6052955      | NPHP4; KCNAB2        |
| cg10716835 | chr10:94833273-94835256   | CYP26A1              |
| cg10717463 | chr18:76737006-76741244   | SALL3                |
| cg10723962 | chr6:26240698-26240951    | H4C6; HIST1H4F       |
| cg10732215 | chr10:22623351-22625875   |                      |
| cg10741025 | chr14:37131182-37132785   | PAX9                 |
| cg10741422 | chr19:21769190-21769786   |                      |
| cg10755058 | chr3:40428652-40429015    | ENTPD3               |
| cg10776919 | chr1:50884229-50891471    | DMRTA2               |
| cg10783469 | chr19:52390842-52391368   | ZNF577; ZNF649-AS1   |
| cg10795666 | chr13:49794126-49795542   | MLNR                 |

|            |                           |                         |
|------------|---------------------------|-------------------------|
| cg10800464 | chr12:109162409-109162722 |                         |
| cg10801328 | chr17:1106813-1107379     | ABR                     |
| cg10802132 | chr5:178487147-178487921  | ZNF354C                 |
| cg10804656 | chr10:22623351-22625875   |                         |
| cg10808783 | chr19:1465207-1471241     | APC2                    |
| cg10823473 | chr15:76630030-76630970   | ISL2                    |
| cg10828284 | chr22:50528202-50529085   | MOV10L1                 |
| cg10859133 | chr2:63281035-63281347    | OTX1                    |
| cg10869581 | chrX:102000690-102001558  | BHLHB9; ARM CX5-GPRASP2 |
| cg10879116 | chr1:85358360-85359187    | LPAR3                   |
| cg10882304 | chr10:123922851-123923542 | TACC2                   |
| cg10886442 | chr3:142837886-142840838  | CHST2                   |
| cg10890302 | chr6:32063534-32065044    | TNXB                    |
| cg10900437 | chr6:149068180-149069775  | UST                     |
| cg10900455 | chr20:42543098-42545137   | TOX2                    |
| cg10903903 | chr6:27647794-27648005    |                         |
| cg10904986 | chr8:145555343-145562310  | SCRT1                   |
| cg10922935 | chr17:78449508-78452783   | NPTX1                   |
| cg10932018 | chr5:54516268-54516919    | MCIDAS                  |
| cg10941566 | chr22:30116082-30117160   | CABP7                   |
| cg10959198 | chr15:93631429-93633173   | RGMA                    |
| cg10961604 | chr1:27709601-27709831    | CD164L2                 |
| cg10964367 | chr8:1771362-1772760      | ARHGEF10                |
| cg10979880 | chr6:105584149-105585621  | BVES; BVES-AS1          |
| cg10981464 | chr1:156828805-156831102  | NTRK1; INSR             |
| cg10982364 | chr2:200320503-200329681  | SATB2                   |
| cg11002404 | chr10:11059443-11060524   | CELF2                   |
| cg11012584 | chr2:242549374-242549995  | THAP4                   |
| cg11013726 | chr15:65116014-65116567   | PIF1                    |
| cg11015251 | chr7:27169573-27170638    | HOXA3; HOXA4; HOXA4-AS2 |
| cg11026555 | chr12:124246525-124247254 | DNAH10                  |
| cg11042561 | chr9:99449111-99449578    |                         |
| cg11051055 | chr8:11057685-11058479    | XKR6                    |
| cg11068343 | chr6:24360030-24360411    | DCDC2                   |
| cg11068946 | chr10:134597358-134602649 | NKX6-2                  |
| cg11070069 | chr6:105388191-105389545  | LIN28B; LIN28B-AS1      |
| cg11073571 | chr4:78978366-78979256    | FRAS1                   |
| cg11077516 | chr13:100620242-100624348 | ZIC5                    |
| cg11098493 | chr3:49314438-49314815    | USP4                    |
| cg11102782 | chr19:18543829-18549161   | ISYNA1; SSBP4           |
| cg11134430 | chr3:193987426-193987758  |                         |
| cg11139646 | chr1:40253684-40255172    | BMP8B                   |
| cg11144753 | chr14:103739579-103740892 |                         |
| cg11172693 | chr20:37434207-37435592   | PPP1R16B                |
| cg11173146 | chr13:107186469-107189024 | EFNB2                   |
| cg11174855 | chr10:134597358-134602649 | NKX6-2                  |
| cg11176990 | chr2:39186778-39187968    | ARHGEF33                |
| cg11183365 | chr6:27064629-27065004    |                         |
| cg11184748 | chr3:36805950-36806214    | DCLK3                   |
| cg11198128 | chr11:65601070-65601551   | SNX32                   |

|            |                           |                    |
|------------|---------------------------|--------------------|
| cg11207307 | chr12:8025365-8025908     | SLC2A14            |
| cg11213690 | chr7:149112307-149112545  |                    |
| cg11214757 | chr5:176023778-176024651  | GPRIN1             |
| cg11219917 | chr4:818647-820970        | CPLX1              |
| cg11223367 | chr3:101497831-101498648  | NXPE3              |
| cg11229513 | chr8:70981874-70984888    | PRDM14             |
| cg11229862 | chr3:126113548-126113967  | CFAP100; CCDC37-DT |
| cg11235741 | chr15:82335473-82339937   | MEX3B              |
| cg11254700 | chr19:53561216-53561812   |                    |
| cg11258043 | chr6:73972820-73973027    | KHDC1              |
| cg11260097 | chr7:121940007-121940648  | FEZF1              |
| cg11267955 | chr5:101632050-101632373  | SLCO4C1            |
| cg11279444 | chr1:53098630-53099303    | SHISAL2A           |
| cg11281641 | chr2:171672311-171675447  | GAD1               |
| cg11282657 | chr17:79614851-79615559   | TSPAN10            |
| cg11294513 | chr19:58220190-58220517   | ZNF154             |
| cg11296759 | chr12:7592407-7593030     | CD163L1            |
| cg11299854 | chr5:132082874-132083911  | CCNI2              |
| cg11312408 | chr13:58206527-58208930   | PCDH17             |
| cg11325578 | chrX:9733155-9734064      | GPR143             |
| cg11326255 | chr19:3785512-3786653     | MATK               |
| cg11331678 | chr20:44540446-44540957   | PLTP               |
| cg11342452 | chr10:134597358-134602649 | NKX6-2             |
| cg11343211 | chr17:15686219-15686474   | IL6STP1            |
| cg11361344 | chr2:220361463-220363254  | SPEGNB             |
| cg11364273 | chr11:63766059-63768666   | MACROD1            |
| cg11364468 | chr7:100806280-100809064  | VGF                |
| cg11376305 | chr19:49127389-49127720   | SPHK2              |
| cg11377136 | chr22:46658398-46659332   | PKDREJ             |
| cg11377730 | chr8:17270604-17271120    | MTMR7              |
| cg11398523 | chr19:50316212-50316469   | FUZ                |
| cg11410023 | chr3:96532024-96533625    | EPHA6              |
| cg11413039 | chr11:125774293-125774584 | DDX25              |
| cg11431957 | chr3:38035702-38036000    | VILL               |
| cg11439596 | chr5:1930755-1931986      | AC124852           |
| cg11456756 | chr6:30227321-30228255    | HLA-L; HCG17       |
| cg11459603 | chr6:26273291-26273557    | HIST1H2BI; H2BC10  |
| cg11472279 | chr10:11059443-11060524   | CELF2              |
| cg11474250 | chr5:107005131-107008191  | EFNA5              |
| cg11480800 | chr15:55879793-55881228   | PYGO1              |
| cg11481534 | chr6:116691828-116692868  | DSE                |
| cg11485595 | chr5:32709911-32714450    | NPR3               |
| cg11500797 | chr7:96651964-96652246    | DLX5               |
| cg11502745 | chr11:18742691-18743513   | IGSF22             |
| cg11509907 | chr2:235404503-235406541  | ARL4C              |
| cg11510060 | chr4:330163-332068        | ZNF141             |
| cg11510523 | chr19:12305553-12306304   |                    |
| cg11521404 | chr13:20735044-20736157   | GJA3               |
| cg11525280 | chr2:26624604-26625057    | DRC1               |
| cg11531021 | chr2:220416864-220417869  | OBSL1              |

|            |                           |                         |
|------------|---------------------------|-------------------------|
| cg11536474 | chr2:63285950-63287097    |                         |
| cg11549953 | chr5:43017969-43018668    |                         |
| cg11563680 | chr6:100917206-100917523  |                         |
| cg11569407 | chr10:130008559-130009620 |                         |
| cg11576274 | chr1:146552329-146552577  |                         |
| cg11592503 | chr7:145813031-145814084  | CNTNAP2                 |
| cg11594731 | chr3:46940055-46940394    | PTH1R                   |
| cg11595545 | chr1:111216245-111217937  | KCNA3                   |
| cg11597475 | chr4:57975861-57976916    | IGFBP7; IGFBP7-AS1      |
| cg11600807 | chr11:17373020-17373665   | NCR3LG1                 |
| cg11621464 | chr19:41119032-41120394   | LTBP4                   |
| cg11629889 | chr17:40838850-40839062   | CNTNAP1                 |
| cg11630554 | chr4:165878037-165878446  | FAM218A                 |
| cg11660826 | chr6:150284683-150286515  | ULBP1                   |
| cg11664500 | chr6:133562087-133563586  | EYA4                    |
| cg11667020 | chr20:21376359-21378245   | NKX2-4                  |
| cg11668749 | chr1:229567207-229570684  | ACTA1                   |
| cg11671688 | chr6:110299366-110301267  | GPR6                    |
| cg11672054 | chr1:228645197-228646434  | HIST3H2A; HIST3H2BB     |
| cg11673291 | chr1:36786501-36789402    | EVA1B; SH3D21           |
| cg11684022 | chr1:247494250-247495840  | ZNF496                  |
| cg11686528 | chr17:1082377-1083833     | ABR                     |
| cg11691298 | chr2:26396103-26397204    | GAREM2                  |
| cg11694752 | chr11:75378417-75379882   | MAP6                    |
| cg11697427 | chr10:102590123-102590402 |                         |
| cg11699265 | chr7:98990158-98990922    | ARPC1B                  |
| cg11701471 | chr8:54163304-54164443    | OPRK1                   |
| cg11716665 | chr5:149569593-149569945  | SLC6A7                  |
| cg11721803 | chr12:48397890-48398731   | COL2A1                  |
| cg11723850 | chr14:24020003-24020251   | ZFH2                    |
| cg11724135 | chr20:25128765-25129610   |                         |
| cg11726648 | chr2:19560964-19561650    |                         |
| cg11737742 | chr1:110752257-110754794  | KCNC4                   |
| cg11753158 | chr10:22540708-22542739   |                         |
| cg11756095 | chr1:32410189-32410630    |                         |
| cg11763509 | chr1:39956425-39958137    | BMP8A                   |
| cg11804775 | chr19:19729128-19729814   | PBX4                    |
| cg11806178 | chr20:39316551-39319987   | MAFB                    |
| cg11823511 | chr1:91183241-91184540    | BARHL2                  |
| cg11827910 | chr11:31825744-31826967   | PAX6                    |
| cg11849086 | chr17:62774367-62777797   | 7P1-BPTFP1-KPNA2P3; ARH |
| cg11855325 | chr7:30028519-30029822    | SCRN1                   |
| cg11856897 | chr1:47998900-47999517    |                         |
| cg11857704 | chr2:3750829-3751927      | DCDC2C                  |
| cg11869770 | chr19:34972055-34973645   | WTIP                    |
| cg11880855 | chr10:16561605-16563822   | C1QL3                   |
| cg11889769 | chr8:104383410-104384109  | CTHRC1                  |
| cg11891395 | chr7:96651964-96652246    | DLX5                    |
| cg11891579 | chr5:158478379-158478630  | EBF1                    |
| cg11915388 | chr22:42470036-42470669   | PHETA2                  |



|            |                           |               |
|------------|---------------------------|---------------|
| cg11929643 | chr3:48698336-48701667    | CELSR3        |
| cg11940285 | chr3:129693128-129694841  | TRH           |
| cg11942956 | chr6:133562087-133563586  | EYA4          |
| cg11945824 | chr6:32116591-32117229    | PRRT1         |
| cg11956953 | chr17:27346854-27347222   |               |
| cg11957331 | chr19:42827744-42829149   | TMEM145       |
| cg11973177 | chr10:17270431-17272617   | VIM; VIM-AS1  |
| cg11979589 | chr4:110222971-110224257  | COL25A1       |
| cg11996428 | chr9:135464587-135466240  | BARHL1        |
| cg12002303 | chr15:68113242-68113520   | SKOR1         |
| cg12002882 | chr20:62461267-62462037   | ZBTB46        |
| cg12004787 | chr11:69517841-69519929   | FGF19         |
| cg12007166 | chr6:30227321-30228255    | HLA-L; HCG17  |
| cg12018098 | chr19:38885234-38885505   | SPRED3        |
| cg12022772 | chr2:131129719-131130511  | PTPN18        |
| cg12028548 | chr20:590223-591222       | TCF15         |
| cg12035092 | chr2:149632683-149633882  | KIF5C         |
| cg12040486 | chr19:11959578-11960064   | ZNF439        |
| cg12041056 | chr22:27053082-27053629   | MIAT          |
| cg12043818 | chr10:47008085-47008410   | GPRIN2        |
| cg12053155 | chr13:107186469-107189024 | EFNB2         |
| cg12058947 | chr15:83875649-83877079   | HDGFL3        |
| cg12060499 | chr14:102172004-102172705 |               |
| cg12060744 | chr19:58094740-58095764   | ZIK1          |
| cg12068816 | chr22:40390485-40391490   | FAM83F        |
| cg12078320 | chr1:54940347-54940753    |               |
| cg12078929 | chr22:42896637-42897041   | SERHL         |
| cg12086936 | chr11:31831621-31839038   | PAX6          |
| cg12091732 | chr10:82116203-82117120   | DYDC2         |
| cg12098872 | chr19:47742726-47743151   |               |
| cg12099952 | chr20:3052098-3053103     | OXT           |
| cg12111714 | chr13:26042694-26043486   | ATP8A2        |
| cg12115991 | chr6:108437999-108441208  |               |
| cg12117141 | chr8:11557853-11558252    | GATA4         |
| cg12121643 | chr3:185911345-185912228  | DGKG          |
| cg12127472 | chr17:42733487-42734626   | MEIOC         |
| cg12142445 | chr19:53970803-53971473   | ZNF813        |
| cg12148647 | chr19:3687787-3688262     | PIP5K1C       |
| cg12162377 | chr2:232260101-232261134  | B3GNT7        |
| cg12169233 | chr19:11959578-11960064   | ZNF439        |
| cg12170314 | chr11:15136059-15136545   | INSC          |
| cg12174341 | chr8:41424342-41425300    |               |
| cg12175729 | chr8:140714586-140718259  | KCNK9         |
| cg12177220 | chr3:38080629-38081187    | DLEC1         |
| cg12178578 | chr1:45792420-45793301    | HPDL          |
| cg12188986 | chr11:93063599-93064076   | DEUP1         |
| cg12191938 | chr10:88730555-88731632   | AGAP11; ADIRF |
| cg12193731 | chr12:52300802-52301583   | ACVRL1        |
| cg12204732 | chr10:128993506-128995167 | DOCK1         |
| cg12206199 | chr2:39186778-39187968    | ARHGEF33      |

|            |                          |                     |
|------------|--------------------------|---------------------|
| cg12212311 | chr18:77557781-77558948  |                     |
| cg12212657 | chr3:3840514-3842772     | LRRN1               |
| cg12213062 | chr2:220299484-220300243 | SPEG                |
| cg12215739 | chr2:177014949-177015214 | MIR10B; HOXD4       |
| cg12217400 | chr6:29521111-29521833   | OR2I1P              |
| cg12220691 | chr19:41641308-41642082  |                     |
| cg12229632 | chr17:2607736-2608005    | CLUH                |
| cg12230728 | chr12:58021295-58022037  | B4GALNT1            |
| cg12233363 | chr6:100912072-100913337 | SIM1                |
| cg12233379 | chr1:151812254-151812525 | C2CD4D              |
| cg12248614 | chr19:41018526-41019486  | SPTBN4              |
| cg12269002 | chr11:77122737-77123088  | PAK1                |
| cg12271981 | chr13:88326601-88326919  | SLITRK5             |
| cg12272837 | chr19:290595-292249      | PLPP2               |
| cg12281657 | chr14:65016517-65016909  | PPP1R36             |
| cg12298268 | chr3:139257713-139257949 | RBP1                |
| cg12306414 | chr4:13548571-13549956   |                     |
| cg12307840 | chr1:223536843-223538628 | SUSD4               |
| cg12315713 | chr11:93063599-93064076  | DEUP1               |
| cg12318501 | chr22:50919454-50920376  | ADM2                |
| cg12319602 | chr5:43017969-43018668   |                     |
| cg12323723 | chrX:136655910-136657085 | ZIC3                |
| cg12338417 | chr3:32858195-32860506   | TRIM71              |
| cg12346592 | chr13:20138856-20139323  |                     |
| cg12356890 | chr10:11059443-11060524  | CELF2               |
| cg12377139 | chr10:22634001-22634862  | SPAG6               |
| cg12414557 | chr4:1107126-1107728     | RNF212              |
| cg12414653 | chr12:8123347-8123561    |                     |
| cg12439325 | chr12:51236634-51236924  | TMPRSS12            |
| cg12441126 | chr7:751713-752150       | PRKAR1B             |
| cg12448161 | chr3:48631883-48632901   | COL7A1              |
| cg12452512 | chrX:100740222-100740601 | ARMCX4              |
| cg12456714 | chr5:16179065-16180420   | MARCH11             |
| cg12457909 | chr7:39649254-39649510   | YAE1                |
| cg12477533 | chr2:98703355-98703889   | VWA3B               |
| cg12497914 | chr20:2672905-2674698    | EBF4                |
| cg12508343 | chr3:125075916-125076481 | ZNF148              |
| cg12508451 | chr15:37172474-37173018  |                     |
| cg12518410 | chr2:109744586-109746833 | SH3RF3; SH3RF3-AS1  |
| cg12534216 | chr6:30095174-30095610   |                     |
| cg12539796 | chr5:7849946-7850439     | c5orf49             |
| cg12547166 | chr4:206378-206892       | ZNF876P             |
| cg12549600 | chr1:113286333-113287172 |                     |
| cg12552771 | chr22:29709282-29712013  | RASL10A             |
| cg12558012 | chr19:19280999-19281560  | BORCS8-MEF2B; MEF2B |
| cg12590600 | chr20:643976-645233      | SCRT2               |
| cg12595013 | chr3:147126989-147128999 | ZIC1                |
| cg12597389 | chr7:8481975-8482762     | NXP1                |
| cg12598635 | chr4:818647-820970       | CPLX1               |
| cg12604950 | chr1:180881317-180882592 | KIAA1614            |

|            |                           |                      |
|------------|---------------------------|----------------------|
| cg12610471 | chr10:22634001-22634862   | SPAG6                |
| cg12615766 | chr8:59058168-59059414    | FAM110B              |
| cg12629875 | chr1:247170869-247171434  | ZNF625; ZNF625-ZNF20 |
| cg12630461 | chr15:91499953-91500818   | RCCD1                |
| cg12630714 | chr4:54975388-54976202    |                      |
| cg12631351 | chr5:80255905-80257006    | RASGRF2; RASGRF2-AS1 |
| cg12640000 | chr1:62660556-62660946    | L1TD1                |
| cg12642693 | chrX:50556225-50557179    | SHROOM4              |
| cg12646649 | chr10:102984183-102990063 | LBX1; LBX1-AS1       |
| cg12648201 | chr2:27664940-27665151    | KRTCAP3; NRBP1       |
| cg12659883 | chr1:119543057-119543454  |                      |
| cg12668309 | chr3:53527928-53530106    | CACNA1D              |
| cg12673103 | chr5:134363093-134365146  | PITX1                |
| cg12690148 | chr1:63782395-63790471    | FOXD3; FOXD3-AS1     |
| cg12696328 | chr1:227729516-227730492  |                      |
| cg12710510 | chr12:3862069-3862606     | CRACR2A; EFCAB4B     |
| cg12727374 | chr3:183542497-183543804  | MAP6D1               |
| cg12727398 | chr2:237086728-237088463  |                      |
| cg12741994 | chr3:170136243-170137886  | CLDN11               |
| cg12744820 | chr6:137814356-137815202  | OLIG3                |
| cg12756396 | chr1:50884229-50891471    | DMRTA2               |
| cg12758687 | chr11:113345069-113346328 | DRD2                 |
| cg12781700 | chr17:42733487-42734626   | MEIOC                |
| cg12782180 | chr7:127880751-127881375  | LEP                  |
| cg12792509 | chr17:27493204-27493880   | MYO18A               |
| cg12796229 | chr18:12407716-12408242   | SLMO1                |
| cg12804791 | chr11:126286452-126286870 |                      |
| cg12810212 | chr2:232378949-232379666  |                      |
| cg12812233 | chr4:40752692-40752896    | NSUN7                |
| cg12816961 | chr10:134597358-134602649 | NKX6-2               |
| cg12820681 | chr7:155164558-155167854  | BLACE                |
| cg12825804 | chr14:77227570-77228691   | VASH1                |
| cg12828075 | chr11:15136059-15136545   | INSC                 |
| cg12840502 | chr22:30116082-30117160   | CABP7                |
| cg12847554 | chr6:100909211-100909444  | SIM1                 |
| cg12855166 | chr17:30845904-30846702   | MYO1D                |
| cg12863545 | chr17:8868470-8869372     | PIK3R5               |
| cg12872693 | chr3:179168736-179169593  | GNB4                 |
| cg12877723 | chr8:57358127-57359415    | PENK                 |
| cg12883980 | chr13:50707586-50708019   | DLEU1                |
| cg12892506 | chr3:147113609-147114479  | ZIC4                 |
| cg12927498 | chr5:141030919-141031177  | FCHSD1               |
| cg12928379 | chr11:636907-640628       | DRD4                 |
| cg12929487 | chr4:41869175-41869459    |                      |
| cg12936335 | chr6:150284683-150286515  | ULBP1                |
| cg12940439 | chr1:67600391-67600715    | C1orf141             |
| cg12940822 | chr5:127872564-127874945  | FBN2                 |
| cg12945444 | chr8:11536768-11538961    | GATA4                |
| cg12966367 | chr3:50377804-50378540    | RASSF1               |
| cg12973941 | chr4:13543563-13546494    | NKX3-2               |

|            |                           |                      |
|------------|---------------------------|----------------------|
| cg12974388 | chr2:237071795-237078762  | GBX2                 |
| cg12975230 | chr18:73167403-73167920   |                      |
| cg12978433 | chr20:52789253-52790986   | CYP24A1              |
| cg12986271 | chr19:31839636-31843049   | TSHZ3                |
| cg12992720 | chr19:19738573-19739821   | LAPAR2               |
| cg12997720 | chr7:27225051-27225629    | HOXA11; HOXA11-AS    |
| cg12998491 | chr9:134151854-134153015  | FAM78A               |
| cg13001868 | chr17:43339125-43339832   | SPATA32; MAP3K14-AS1 |
| cg13021333 | chr6:6002472-6005125      | NRN1                 |
| cg13024368 | chr11:12029738-12030841   | DKK3                 |
| cg13040693 | chr13:45885755-45886103   |                      |
| cg13045555 | chr8:105342214-105342558  |                      |
| cg13056495 | chr7:134143116-134144063  | AKR1B1               |
| cg13066043 | chr14:24808636-24808992   | RIPK3                |
| cg13072057 | chr3:160822495-160823260  | B3GALNT1             |
| cg13080379 | chr1:119526783-119527192  | TBX15                |
| cg13088368 | chr20:42543098-42545137   | TOX2                 |
| cg13092806 | chr2:177042752-177043444  | HAGLR; HAGLROS       |
| cg13102585 | chr17:42385811-42386393   | RUNDC3A; RUNDC3A-AS1 |
| cg13111733 | chr1:228645197-228646434  | HIST3H2BB; HIST3H2A  |
| cg13118906 | chr17:61523001-61524470   | CYB561               |
| cg13122377 | chr19:57683597-57683850   | DUXA                 |
| cg13139972 | chr4:107956556-107957453  | DKK2                 |
| cg13155001 | chr4:121843149-121844193  | PRDM5                |
| cg13160874 | chr2:242549374-242549995  | THAP4                |
| cg13167730 | chr1:47909713-47911020    |                      |
| cg13168407 | chr22:38808785-38809017   |                      |
| cg13176012 | chr2:157176252-157177346  |                      |
| cg13177786 | chr11:10472001-10472857   | AMPD3                |
| cg13191049 | chr15:99645031-99646444   | SYNM                 |
| cg13198321 | chr15:58357310-58358776   | ALDH1A2              |
| cg13204512 | chr17:29298047-29298606   | RNF135               |
| cg13208922 | chr4:298804-299312        | ZNF732               |
| cg13239420 | chr1:240160838-240161616  |                      |
| cg13246235 | chr6:12749878-12750499    | PHACTR1              |
| cg13247663 | chr8:59058168-59059414    | FAM110B              |
| cg13258989 | chr17:72968168-72969164   | HID1                 |
| cg13267264 | chr8:70981874-70984888    | PRDM14               |
| cg13267747 | chr5:141030919-141031177  | FCHSD1               |
| cg13274077 | chr2:121334309-121334801  |                      |
| cg13280283 | chr6:137242316-137245442  | SLC35D3              |
| cg13283952 | chr2:121411984-121412315  |                      |
| cg13298199 | chr1:208132328-208133117  |                      |
| cg13300273 | chr1:200842197-200843388  | GPR25                |
| cg13304665 | chr22:22862624-22863220   | ZNF280B              |
| cg13314145 | chr7:98245806-98247759    | NPTX2                |
| cg13323701 | chr6:118228043-118229811  | SLC35F1              |
| cg13325154 | chr10:104000255-104001741 | PITX3                |
| cg13326227 | chr20:20344401-20350605   | INSM1                |
| cg13327545 | chr10:22623351-22625875   |                      |

|            |                           |                        |
|------------|---------------------------|------------------------|
| cg13335974 | chr17:72838813-72839751   | GRIN2C                 |
| cg13337047 | chr19:57683597-57683850   | DUXA                   |
| cg13341720 | chr19:6740670-6741203     | TRIP10                 |
| cg13342435 | chr11:30605559-30605800   | MPPED2; MPPED2-AS1     |
| cg13352836 | chr16:31225957-31228264   | TRIM72                 |
| cg13355047 | chr19:4304543-4305122     | FSD1                   |
| cg13356896 | chr2:198649752-198651599  | BOLL                   |
| cg13368923 | chr6:1378446-1379318      |                        |
| cg13372458 | chr12:95266833-95267785   |                        |
| cg13389502 | chr17:1952920-1962328     | HIC1                   |
| cg13409645 | chr19:55865825-55866324   | COX6B2; FAM71E2        |
| cg13422850 | chr9:135116148-135117929  | NTNG2                  |
| cg13423383 | chr9:139888935-139890343  | CLIC3                  |
| cg13424029 | chr10:101297439-101297703 | NKX2-3                 |
| cg13438961 | chr1:41249091-41250161    | KCNQ4                  |
| cg13443627 | chr1:59042014-59043295    | TACSTD2                |
| cg13445593 | chr6:30227321-30228255    | HLA-L; HCG17           |
| cg13445796 | chr11:20181201-20182325   | DBX1                   |
| cg13459498 | chr20:42543098-42545137   | TOX2                   |
| cg13462028 | chr18:9707753-9709311     | RAB31                  |
| cg13465477 | chr9:133534535-133542394  | PRDM12                 |
| cg13468002 | chr3:49906738-49907482    | CAMKV                  |
| cg13472192 | chr1:41349741-41350293    |                        |
| cg13476854 | chr1:119549145-119551320  |                        |
| cg13481969 | chr9:99449111-99449578    |                        |
| cg13484549 | chr19:49646093-49646308   | PPFIA3                 |
| cg13490403 | chr9:124981536-124982835  | LHX6                   |
| cg13491250 | chr2:20068429-20068907    | LINC00954              |
| cg13499300 | chr19:54369388-54369809   | MYADM                  |
| cg13516820 | chr9:37034136-37038341    | PAX5                   |
| cg13525067 | chr19:15662114-15662358   | CYP4F22                |
| cg13530938 | chr2:239140097-239140659  |                        |
| cg13532885 | chrX:47478671-47479515    | SYN1                   |
| cg13545212 | chr17:6616423-6617471     | SLC13A5                |
| cg13556491 | chr19:19738573-19739821   | LAPAR2                 |
| cg13562542 | chr3:71802561-71804209    | EIF4E3                 |
| cg13564825 | chr19:38746639-38747379   | PPP1R14A               |
| cg13570982 | chr14:55595698-55596692   | LGALS3                 |
| cg13592399 | chr14:52534582-52536722   | NID2                   |
| cg13601435 | chr9:120507228-120507642  |                        |
| cg13607709 | chr3:46940055-46940394    | PTH1R                  |
| cg13610307 | chr9:140917285-140918052  | CACNA1B                |
| cg13628577 | chr5:122430677-122431443  | PRDM6                  |
| cg13634242 | chr5:60921535-60922472    | c5orf64                |
| cg13634602 | chr18:76737006-76741244   | SALL3                  |
| cg13641185 | chr6:29521111-29521833    | OR2I1P                 |
| cg13647155 | chr5:176046144-176047641  | SNCB                   |
| cg13647536 | chr7:27260102-27260467    |                        |
| cg13662093 | chr20:33865334-33865563   | MP24OS; MMP24-AS1-EDEN |
| cg13677149 | chr7:27284640-27286237    | EVX1                   |

|            |                           |                              |
|------------|---------------------------|------------------------------|
| cg13687570 | chr19:37825102-37825756   | HKR1                         |
| cg13692446 | chr13:112758599-112760491 | SOX1-OT                      |
| cg13699414 | chr5:178957434-178957900  |                              |
| cg13702005 | chr12:103889149-103889843 | C12orf42                     |
| cg13703049 | chr7:27212417-27214396    | HOXA10; HOXA10-HOXA9         |
| cg13703871 | chr19:9473590-9474001     | ZNF559-ZNF177                |
| cg13707894 | chr3:27674210-27674639    |                              |
| cg13717446 | chr17:62774367-62777797   | ZFP1-BPTFP1-KPNA2P3; ARH     |
| cg13721404 | chr18:31739048-31739522   | NOL4                         |
| cg13725782 | chr6:105584149-105585621  | BVES; BVES-AS1               |
| cg13726682 | chr17:29718231-29719291   | RAB11FIP4                    |
| cg13729891 | chr17:7108305-7108654     | DLG4                         |
| cg13730743 | chr19:52207133-52207731   | SPACA6                       |
| cg13755546 | chr2:74425445-74426423    | MTHFD2                       |
| cg13759674 | chr9:140051063-140051730  | GRIN1                        |
| cg13765939 | chr22:27053082-27053629   | MIAT                         |
| cg13768269 | chr9:112917-114839        |                              |
| cg13784235 | chr6:108495655-108495986  | NR2E1                        |
| cg13788515 | chr2:207139337-207140031  | ZDBF2                        |
| cg13791254 | chr9:100615235-100617510  | FOXE1                        |
| cg13794530 | chr7:158936508-158938492  | VIPR2                        |
| cg13794993 | chr18:76737006-76741244   | SALL3                        |
| cg13796381 | chr9:139872238-139873143  | PTGDS                        |
| cg13796823 | chr6:130686415-130687736  | SAMD3; TMEM200A              |
| cg13798146 | chr15:83875649-83877079   | HDGFL3                       |
| cg13800209 | chr15:37390176-37390380   | MEIS2                        |
| cg13802013 | chr20:37302814-37303388   |                              |
| cg13803688 | chr1:110610266-110613303  | ALX3                         |
| cg13817952 | chr9:124987744-124991086  | LHX6                         |
| cg13846270 | chr13:51417372-51418149   | DLEU7; DLEU7-AS1             |
| cg13849378 | chr1:241520104-241520790  | RGS7                         |
| cg13850380 | chr1:1474963-1475220      | TMEM240                      |
| cg13850606 | chr1:229542944-229543770  |                              |
| cg13865488 | chr9:137299191-137299437  | RXRA                         |
| cg13868084 | chr9:86755386-86755700    |                              |
| cg13877670 | chr15:53080459-53083699   | ONECUT1                      |
| cg13879483 | chr12:95941907-95942979   | USP44                        |
| cg13887205 | chr5:139525538-139526227  |                              |
| cg13888593 | chr2:74641734-74643350    | C2orf81                      |
| cg13894813 | chr11:68181087-68181289   | LRP5                         |
| cg13900100 | chr6:43970074-43970922    | c6orf223                     |
| cg13902210 | chr1:110752257-110754794  | KCNC4                        |
| cg13912311 | chr9:127265171-127267659  | NR5A1                        |
| cg13913015 | chr2:47796924-47799166    | KCNK12                       |
| cg13917662 | chr13:100547634-100548911 | CLYBL                        |
| cg13921956 | chr2:12856626-12859019    | TRIB2                        |
| cg13930892 | chr11:2290105-2292932     | ASCL2                        |
| cg13933080 | chr10:22634001-22634862   | SPAG6                        |
| cg13933262 | chr5:140797163-140797701  | 2,3,4,5,6,7,8,9,10; PCDHGB1, |
| cg13933734 | chr1:119549145-119551320  |                              |

|            |                           |                       |
|------------|---------------------------|-----------------------|
| cg13942157 | chr15:29862036-29863649   | FAM189A1              |
| cg13947995 | chr15:91427541-91427905   | FES                   |
| cg13952656 | chr2:232260101-232261134  | B3GNT7                |
| cg13954457 | chr5:167956220-167957371  | FBLL1                 |
| cg13967888 | chr9:97094627-97095058    |                       |
| cg13974632 | chr11:27740645-27741236   | BDNF                  |
| cg13974773 | chr6:27463177-27463379    |                       |
| cg13984181 | chr1:92495368-92495964    | EPHX4                 |
| cg13990746 | chr1:173638663-173639045  | ANKRD45               |
| cg13996426 | chr3:49755764-49757317    | AMIGO3; GMPPB; RNF123 |
| cg13997645 | chr11:15136059-15136545   | INSC                  |
| cg14002345 | chr11:31831621-31839038   | PAX6                  |
| cg14002960 | chr18:31739048-31739522   | NOL4                  |
| cg14007036 | chrX:136113584-136114232  | GPR101                |
| cg14007067 | chr18:76737006-76741244   | SALL3                 |
| cg14013195 | chr2:26624604-26625057    | DRC1                  |
| cg14015044 | chr8:22960385-22960927    | TNFRSF10C             |
| cg14019323 | chr12:65218246-65219143   | TBC1D30               |
| cg14024461 | chr1:228645197-228646434  | HIST3H2BB; HIST3H2A   |
| cg14038391 | chr10:102899823-102900263 | TLX1NB                |
| cg14044640 | chr7:27186928-27187692    | HOXA6; HOXA-AS3       |
| cg14045872 | chr7:49813009-49815752    | VWC2                  |
| cg14052210 | chr6:26521948-26522579    | HCG11                 |
| cg14054357 | chr17:2607736-2608005     | CLUH                  |
| cg14065127 | chr20:3063006-3064146     | AVP                   |
| cg14069049 | chr4:11430236-11431256    | HS3ST1                |
| cg14069965 | chr6:24357720-24358309    | DCDC2; KAAG1          |
| cg14079463 | chr6:127796287-127797356  | SOGA3                 |
| cg14084907 | chr1:3634634-3635101      | TP73                  |
| cg14088357 | chr19:46800054-46800603   | HIF3A                 |
| cg14092045 | chr9:116450146-116450454  |                       |
| cg14095438 | chr8:49468684-49468959    |                       |
| cg14095692 | chr18:8704722-8707557     | GACAT2; MTCL1         |
| cg14098681 | chr10:8091375-8098329     | GATA3; GATA3-AS1      |
| cg14104369 | chr20:57463653-57467739   | GNAS                  |
| cg14117138 | chr19:46800054-46800603   | HIF3A                 |
| cg14126493 | chr5:176830276-176831639  | F12                   |
| cg14132888 | chr5:114514717-114516220  | TRIM36                |
| cg14142171 | chr6:30227321-30228255    | HLA-L; HCG17          |
| cg14144513 | chr11:69258150-69258544   |                       |
| cg14145477 | chr13:33589929-33591428   | KL                    |
| cg14153126 | chr9:131218101-131219409  | ODF2                  |
| cg14156405 | chr1:241520104-241520790  | RGS7                  |
| cg14159026 | chr6:105584149-105585621  | BVES; BVES-AS1        |
| cg14159336 | chr1:228645197-228646434  | HIST3H2BB; HIST3H2A   |
| cg14159790 | chr9:139886313-139887180  | PAXX                  |
| cg14166009 | chr19:37825102-37825756   | HKR1                  |
| cg14169333 | chr9:96720587-96723189    | BARX1-DT              |
| cg14178748 | chr1:153650831-153652375  | NPR1                  |
| cg14183206 | chr6:30227321-30228255    | HLA-L; HCG17          |

|            |                           |                    |
|------------|---------------------------|--------------------|
| cg14185918 | chr9:110249749-110252660  | KLF4               |
| cg14186641 | chr6:88875398-88877449    | CNR1               |
| cg14186816 | chr18:55862654-55862873   | NEDD4L             |
| cg14189141 | chr9:1042418-1042973      |                    |
| cg14202325 | chr3:13114628-13115245    | IQSEC1             |
| cg14216029 | chr19:42901017-42901375   | LIPE-AS1           |
| cg14231297 | chr19:58629310-58630241   | ZSCAN18            |
| cg14249348 | chr4:48492118-48493589    | ZAR1               |
| cg14250130 | chr10:3108651-3111419     | PFKP               |
| cg14251622 | chr14:36002599-36005013   | INSM2              |
| cg14252279 | chr9:124360439-124362382  | DAB2IP             |
| cg14252602 | chr19:22018595-22018827   | ZNF43              |
| cg14263942 | chr4:76555367-76556079    | CDKL2              |
| cg14270220 | chr12:49371691-49375550   | WNT1               |
| cg14270292 | chr6:133562087-133563586  | EYA4               |
| cg14273450 | chr2:26624604-26625057    | DRC1               |
| cg14278853 | chr6:29521111-29521833    | OR2I1P             |
| cg14284952 | chr8:104152727-104153390  | BAALC              |
| cg14287112 | chr6:133562087-133563586  | EYA4               |
| cg14287235 | chr14:24803679-24804353   | ADCY4              |
| cg14298200 | chr8:65498604-65498828    |                    |
| cg14305313 | chr9:109622425-109623203  |                    |
| cg14306734 | chr18:34833555-34834606   | CELF4              |
| cg14306956 | chr9:37026223-37028014    | PAX5               |
| cg14314653 | chr6:105584149-105585621  | BVES; BVES-AS1     |
| cg14314744 | chr6:100897081-100897621  | SIM1               |
| cg14315558 | chr21:26934424-26934805   | MIR155HG           |
| cg14320054 | chr9:110227968-110228656  |                    |
| cg14327531 | chr10:8091375-8098329     | GATA3; GATA3-AS1   |
| cg14328457 | chr17:37380954-37382363   | STAC2              |
| cg14337339 | chr3:53527928-53530106    | CACNA1D            |
| cg14345012 | chr20:26188639-26190348   | MIR663AHG; MIR6633 |
| cg14347199 | chr9:91149946-91150648    | NXNL2              |
| cg14353137 | chr8:67873389-67875600    | TCF24              |
| cg14361409 | chr14:104583037-104584574 | MIR203B            |
| cg14362312 | chr9:136293567-136294160  | ADAMTS13           |
| cg14369648 | chr9:33750520-33751160    | PRSS3              |
| cg14380270 | chr17:33700488-33700760   | SLFN11             |
| cg14382750 | chr9:100263676-100265217  | TMOD1              |
| cg14396421 | chr19:21769190-21769786   |                    |
| cg14409810 | chr9:140172614-140176105  | TOR4A              |
| cg14414971 | chr7:3340355-3341216      | SDK1               |
| cg14416311 | chr9:89560585-89562647    | GAS1; GAS1RR       |
| cg14416371 | chr11:43602546-43603215   | MIR129-2           |
| cg14424538 | chr20:1783825-1784552     |                    |
| cg14451382 | chr5:1874908-1879032      | IRX4               |
| cg14453201 | chr5:320789-323010        | AHRR               |
| cg14456683 | chr3:147126989-147128999  | ZIC1               |
| cg14458619 | chr9:8857486-8858708      | PTPRD; PTPRD-AS1   |
| cg14463412 | chr9:96588599-96588933    |                    |



|            |                           |                    |
|------------|---------------------------|--------------------|
| cg14473102 | chr2:176993480-176995557  | HOXD8; HOXD-AS2    |
| cg14473344 | chr3:142837886-142840838  | CHST2              |
| cg14486338 | chr8:99438693-99440425    | KCNS2              |
| cg14493920 | chr9:37034136-37038341    | PAX5               |
| cg14498666 | chr9:21031514-21031823    | HACD4              |
| cg14502484 | chr5:1444679-1446648      | SLC6A3             |
| cg14506196 | chr10:101294444-101297263 | NKX2-3             |
| cg14507560 | chr5:1881925-1887743      | IRX4; CTD2194D22.4 |
| cg14510333 | chr16:51168267-51169110   |                    |
| cg14531663 | chr6:32116591-32117229    | PRRT1              |
| cg14531862 | chr19:44763979-44764312   | ZNF233             |
| cg14543941 | chr10:71077947-71079377   | HK1                |
| cg14547067 | chr11:46316876-46317485   | CREB3L1            |
| cg14556683 | chr19:15342627-15343181   | EPHX3              |
| cg14557534 | chr3:27762352-27763995    | EOMES              |
| cg14568830 | chr10:23462225-23463889   |                    |
| cg14570307 | chr7:148982080-148982675  | LOC155060; ZNF783  |
| cg14572967 | chr9:35616981-35617324    | CD72               |
| cg14587524 | chr19:38182794-38183327   | ZNF781             |
| cg14592933 | chr7:26415747-26416891    |                    |
| cg14602438 | chr19:37463992-37464606   | ZNF568; ZNF829     |
| cg14608384 | chr5:54516268-54516919    | MCIDAS             |
| cg14614314 | chr10:135148197-135150565 | CALY               |
| cg14614811 | chr5:159399005-159399928  | ADRA1B             |
| cg14615784 | chr5:94955631-94957244    | GPR150             |
| cg14619259 | chr5:141705392-141705688  | SPRY4-AS1          |
| cg14631834 | chr18:28621490-28623117   | DSC3               |
| cg14643892 | chr12:64784011-64784664   | C12orf56           |
| cg14644001 | chr6:32116591-32117229    | PRRT1              |
| cg14644871 | chr7:26191795-26192757    | NFE2L3             |
| cg14645545 | chr2:219252422-219252631  | SLC11A1            |
| cg14654324 | chr9:137299191-137299437  | RXRA               |
| cg14654468 | chr17:80186136-80189990   | SLC16A3            |
| cg14663510 | chr10:124894076-124897366 | HMX3               |
| cg14670974 | chr5:157098264-157099041  | SOX30              |
| cg14673387 | chr10:47008085-47008410   | GPRIN2             |
| cg14673618 | chr2:45169506-45171884    | SIX3               |
| cg14676825 | chr17:27038085-27038919   | PROCA1             |
| cg14681055 | chr10:104000255-104001741 | PITX3              |
| cg14688104 | chr8:99438693-99440425    | KCNS2              |
| cg14696396 | chr15:83775862-83776922   | TM6SF1             |
| cg14699728 | chr11:66188131-66189397   | NPAS4              |
| cg14704921 | chr4:53728038-53729000    | RASL11B            |
| cg14709460 | chr7:28995306-28998541    | TRIL               |
| cg14709691 | chr1:46632690-46632932    | PIK3R3             |
| cg14711690 | chr1:226924561-226926553  | ITPKB              |
| cg14719951 | chr18:28621490-28623117   | DSC3               |
| cg14732324 | chr5:528384-528982        |                    |
| cg14736058 | chr4:16084196-16085735    | PROM1              |
| cg14738806 | chr12:115102688-115103982 |                    |

|            |                           |                  |
|------------|---------------------------|------------------|
| cg14741939 | chr3:147126989-147128999  | ZIC1             |
| cg14743594 | chr5:167956220-167957371  | FBLL1            |
| cg14757228 | chr6:32116591-32117229    | PRRT1            |
| cg14776962 | chr6:26251899-26252233    | HIST1H2BH; H2BC9 |
| cg14780416 | chr7:27208872-27209616    | HOXA10-AS        |
| cg14780632 | chr11:65816405-65816665   | GAL3ST3          |
| cg14789818 | chr1:227748424-227748860  |                  |
| cg14808890 | chr6:26250437-26250827    | HIST1H3F         |
| cg14819504 | chr2:160760605-160761452  | LY75; LY75-CD302 |
| cg14822490 | chr10:124907284-124911035 | HMX2             |
| cg14823851 | chr17:59531724-59535254   | TBX4             |
| cg14826425 | chr7:27231806-27233097    |                  |
| cg14861089 | chr10:102893661-102895059 | TLX1             |
| cg14871601 | chr7:64029903-64030972    |                  |
| cg14889643 | chr18:60985504-60985741   | BCL2             |
| cg14897419 | chr10:134120448-134122422 | STK32C           |
| cg14899716 | chr1:42845979-42846988    | RIMKLA           |
| cg14907769 | chr8:49468684-49468959    |                  |
| cg14930075 | chr8:140714586-140718259  | KCNK9            |
| cg14944647 | chr11:43602546-43603215   | MIR129-2         |
| cg14986699 | chr2:149632683-149633882  | KIF5C            |
| cg14988503 | chr4:76555367-76556079    | CDKL2            |
| cg14991984 | chr1:99469933-99470968    | PLPPR5           |
| cg14993712 | chr7:138720045-138721019  | ZC3HAV1L         |
| cg14996143 | chr2:172944989-172945384  | METAP1D          |
| cg14996783 | chr7:28995306-28998541    | TRIL             |
| cg14999001 | chr7:45197182-45197807    | RAMP3            |
| cg15000841 | chr11:64815041-64815722   | NAALADL1         |
| cg15006175 | chr8:145697880-145698784  | KIFC2            |
| cg15014975 | chr1:25255528-25259005    | RUNX3            |
| cg15015920 | chr5:16179065-16180420    | MARCH11          |
| cg15017004 | chr18:2905951-2907348     | EMILIN2          |
| cg15032314 | chr19:50096610-50096912   | PRR12            |
| cg15044248 | chr17:75368689-75370506   | SEPTIN9          |
| cg15071854 | chr1:45792420-45793301    | HPDL             |
| cg15073853 | chr19:18543829-18549161   | ISYNA1; SSBP4    |
| cg15090005 | chr1:10057122-10058108    | RBP7             |
| cg15092343 | chr4:4859633-4860191      | MSX1             |
| cg15100599 | chr1:223536843-223538628  | SUSD4            |
| cg15104644 | chr1:231296560-231297345  | TRIM67           |
| cg15105326 | chr3:147108512-147111703  | ZIC4             |
| cg15110403 | chr19:17392384-17393775   | ANKLE1           |
| cg15114474 | chr11:69451137-69458596   | CCND1            |
| cg15126179 | chr13:79181328-79181614   | OBI1-AS1         |
| cg15126975 | chr2:175208416-175209076  |                  |
| cg15140191 | chr6:56818874-56820308    | DST; BEND6       |
| cg15140703 | chr7:99774734-99775583    | STAG3            |
| cg15147516 | chr1:226411008-226411880  | MIXL1            |
| cg15148683 | chr19:36736022-36736884   | ZNF565           |
| cg15149655 | chr2:98703355-98703889    | VWA3B            |

|            |                           |                            |
|------------|---------------------------|----------------------------|
| cg15157455 | chr1:149399899-149400518  | H3-2; HIST2H3PS2           |
| cg15167155 | chr19:53662190-53662500   | ZNF347                     |
| cg15167646 | chr17:47653212-47654369   | NXP3                       |
| cg15174623 | chr7:35494214-35494702    |                            |
| cg15192750 | chr16:69999038-69999777   |                            |
| cg15201417 | chr11:66034752-66035054   | KLC2; RAB1B                |
| cg15201635 | chr16:68480865-68482822   | SMPD3                      |
| cg15202627 | chr4:1685406-1686743      | FAM53A                     |
| cg15203566 | chr5:115697135-115697589  |                            |
| cg15205527 | chr13:45885755-45886103   |                            |
| cg15205636 | chr13:21520329-21520564   |                            |
| cg15244223 | chr6:118228043-118229811  | SLC35F1                    |
| cg15264710 | chr6:33396051-33396296    | SYNGAP1                    |
| cg15267232 | chr10:8091375-8098329     | GATA3; GATA3-AS1           |
| cg15297724 | chr10:75407414-75407706   | SYNPO2L                    |
| cg15317815 | chr3:8808962-8811280      | OXTR                       |
| cg15336765 | chr12:50354840-50356163   | AQP5                       |
| cg15339231 | chr7:96650222-96651551    | DLX5                       |
| cg15346168 | chr14:24835811-24836220   | NFATC4                     |
| cg15364725 | chr10:92616821-92618034   | HTR7                       |
| cg15365320 | chr11:17373020-17373665   | NCR3LG1                    |
| cg15375239 | chr19:38754847-38755699   | SPINT2                     |
| cg15377283 | chr8:55370171-55372525    | SOX17                      |
| cg15386964 | chr6:26250437-26250827    | HIST1H3F                   |
| cg15391574 | chr11:134201785-134202407 | GLB1L2                     |
| cg15396686 | chr10:124894076-124897366 | HMX3                       |
| cg15397374 | chr8:49647703-49647988    | EFCAB1                     |
| cg15412498 | chr5:71402878-71404868    | MAP1B                      |
| cg15415545 | chr16:30204696-30206485   | DLA2B; SLX1A; SLX1A-SULT1A |
| cg15427886 | chr8:55378929-55380186    |                            |
| cg15428435 | chr14:102247661-102248279 | PPP2R5C                    |
| cg15443535 | chr14:93153279-93154759   | RIN3                       |
| cg15444947 | chr7:28995306-28998541    | TRIL                       |
| cg15448975 | chr4:5894072-5895116      | CRMP1                      |
| cg15449956 | chr8:106330519-106332120  | ZFPM2                      |
| cg15457058 | chr1:47881897-47883065    | FOXE3                      |
| cg15459780 | chr12:104609398-104610172 | TXNRD1                     |
| cg15460093 | chr10:135089970-135090491 | ADAM8                      |
| cg15460872 | chr15:99190447-99194559   | IGF1R; IRAIN               |
| cg15466862 | chr13:112720565-112723582 | SOX1                       |
| cg15467646 | chr1:22140892-22141407    | LDLRAD2                    |
| cg15471815 | chr1:228645197-228646434  | HIST3H2BB; HIST3H2A        |
| cg15475851 | chr10:105036629-105038084 | INA                        |
| cg15490715 | chr6:29521111-29521833    | OR2I1P                     |
| cg15491911 | chr6:167764523-167765124  |                            |
| cg15506157 | chr7:139167481-139168712  | KLRG2                      |
| cg15506609 | chr7:27203916-27206462    | HOXA9                      |
| cg15520279 | chr2:176993480-176995557  | HOXD8; HOXD-AS2            |
| cg15531403 | chr8:53851702-53854426    | NPBWR1                     |
| cg15545772 | chr1:179560752-179561596  | TDRD5                      |

|            |                           |                               |
|------------|---------------------------|-------------------------------|
| cg15553598 | chr5:175792356-175793505  | ARL10                         |
| cg15555527 | chr4:80885845-80886148    | ANTXR2                        |
| cg15558882 | chr10:134597358-134602649 | NKX6-2                        |
| cg15565032 | chr15:68870634-68871974   | CORO2B                        |
| cg15579650 | chrX:101906002-101907017  | ARMCX5-GPRASP2; GPRASP1       |
| cg15600488 | chr8:17270604-17271120    | MTMR7                         |
| cg15602740 | chr3:120003884-120004426  | GPR156                        |
| cg15607538 | chr12:133484659-133485739 |                               |
| cg15611336 | chr15:75248278-75249922   | RPP25                         |
| cg15613048 | chr1:21043833-21044771    | KIF17                         |
| cg15617814 | chr11:131780329-131781532 | NTM                           |
| cg15618978 | chr3:160167185-160168200  | TRIM59; TRIM59-IFT80; RP11432 |
| cg15627078 | chr13:24152900-24154140   | TNFRSF19                      |
| cg15642758 | chr15:83875649-83877079   | HDGFL3                        |
| cg15646817 | chr5:80255905-80257006    | RASGRF2; RASGRF2-AS1          |
| cg15655500 | chr18:12407716-12408242   | SLMO1                         |
| cg15661311 | chr11:504190-504659       | RNH1                          |
| cg15666214 | chr6:108437999-108441208  |                               |
| cg15672768 | chr5:140741175-140741738  | PCDHGB1,2,3,4                 |
| cg15679813 | chr22:45403037-45406372   | PHF21B                        |
| cg15681358 | chr10:99473521-99474664   | MARVELD1                      |
| cg15684724 | chr8:67873389-67875600    | TCF24                         |
| cg15690342 | chr5:72594148-72595808    |                               |
| cg15701313 | chr12:125534061-125534527 |                               |
| cg15720669 | chr3:138663719-138666346  | FOXL2; FOXL2NB                |
| cg15728256 | chr1:40253684-40255172    | BMP8B                         |
| cg15732502 | chr10:93647053-93647393   |                               |
| cg15732768 | chr7:96650222-96651551    | DLX5                          |
| cg15732851 | chr1:203598472-203598853  | ATP2B4                        |
| cg15737319 | chr2:74425445-74426423    | MTHFD2                        |
| cg15747595 | chr8:98289605-98290404    | TSPYL5                        |
| cg15760257 | chr17:26698360-26699557   | SARM1                         |
| cg15766075 | chr2:241496577-241497600  | ANKMY1                        |
| cg15766101 | chr19:46518284-46520080   | CCDC61                        |
| cg15769764 | chr4:995483-997541        | IDUA                          |
| cg15775138 | chr7:127744195-127744554  |                               |
| cg15778437 | chr11:31839364-31839813   | PAX6                          |
| cg15790820 | chr11:2290105-2292932     | ASCL2                         |
| cg15802091 | chr14:65006875-65009197   | HSPA2                         |
| cg15811515 | chr16:31580560-31581023   | YBX3P1                        |
| cg15818307 | chr6:29521111-29521833    | OR2I1P                        |
| cg15822765 | chr6:28956107-28956578    | HCG15                         |
| cg15834072 | chr4:155410624-155413393  | DCHS2                         |
| cg15835396 | chr7:128809090-128809393  | TSPAN33                       |
| cg15841063 | chr1:63782395-63790471    | FOXD3; FOXD3-AS1              |
| cg15844835 | chr5:141030919-141031177  | FCHSD1                        |
| cg15845792 | chr6:28175283-28175605    |                               |
| cg15846316 | chr4:57371583-57372022    | ARL9                          |
| cg15861585 | chr11:636907-640628       | DRD4                          |
| cg15866977 | chr17:79917287-79920022   | NOTUM                         |

|            |                           |                             |
|------------|---------------------------|-----------------------------|
| cg15869463 | chr17:62774367-62777797   | BPTFP1-KPNA2P3; ARHGAP2     |
| cg15873149 | chr3:147136904-147137328  | ZIC1                        |
| cg15875437 | chr4:2059929-2063181      | NAT8L                       |
| cg15883716 | chr1:173638663-173639045  | ANKRD45                     |
| cg15887459 | chr11:18230620-18230906   | SLC25A51P4                  |
| cg15904523 | chr19:44763979-44764312   | ZNF233                      |
| cg15912800 | chr7:27208872-27209616    | HOXA10-AS                   |
| cg15936446 | chr5:42951077-42952410    |                             |
| cg15949044 | chr5:140864528-140864748  | 7,8,9,10,11,12; PCDHGB1,2,3 |
| cg15954353 | chr17:5403132-5404602     |                             |
| cg15968604 | chr5:157098264-157099041  | SOX30                       |
| cg15969216 | chr13:45149971-45152288   | TSC22D1                     |
| cg15979173 | chr1:91182098-91182364    | BARHL2                      |
| cg15985184 | chr19:51830065-51831145   | IGLON5                      |
| cg15987885 | chr1:183386001-183387664  | NMNAT2                      |
| cg15990972 | chr2:177012372-177012675  |                             |
| cg15991309 | chr17:80291021-80292394   | SECTM1                      |
| cg15992535 | chr5:139227606-139228279  | NRG2                        |
| cg15992563 | chr13:28491489-28492518   | PLUT                        |
| cg15993383 | chr3:123166219-123168567  | ADCY5                       |
| cg15994026 | chr4:15779999-15780729    | CD38                        |
| cg15994467 | chr12:52400468-52401696   | GRASP                       |
| cg15998779 | chr3:159756633-159756997  | IL12A-AS1                   |
| cg16002818 | chr2:198649752-198651599  | BOLL                        |
| cg16008609 | chr1:213123648-213125092  | VASH2                       |
| cg16022575 | chr1:47902794-47905518    | FOXD2                       |
| cg16042259 | chr6:100917206-100917523  |                             |
| cg16043357 | chr10:118895964-118898037 | VAX1                        |
| cg16046465 | chr15:44486742-44487860   | FRMD5                       |
| cg16054907 | chr22:50705407-50706553   | MAPK11                      |
| cg16076328 | chr2:47596630-47597256    | EPCAM                       |
| cg16086620 | chr14:93389246-93389899   | CHGA                        |
| cg16097357 | chr17:73583839-73586337   | MYO15B                      |
| cg16104915 | chr7:27203916-27206462    | HOXA9                       |
| cg16108230 | chr6:117584585-117584816  |                             |
| cg16113681 | chr22:19748651-19749189   | TBX1                        |
| cg16115720 | chr1:208084099-208084513  | CD34                        |
| cg16124981 | chr19:9896564-9896994     | ZNF846                      |
| cg16126280 | chr5:158527375-158527983  | AK123543                    |
| cg16128701 | chr8:82192379-82193685    | FABP5                       |
| cg16132520 | chr7:134143116-134144063  | AKR1B1                      |
| cg16133088 | chr12:3862069-3862606     | CRACR2A; EFCAB4B            |
| cg16145113 | chr1:119549145-119551320  |                             |
| cg16150752 | chr5:16179065-16180420    | MARCH11                     |
| cg16158807 | chr9:95946148-95947835    | WNK2                        |
| cg16194233 | chr6:108437999-108441208  |                             |
| cg16197925 | chr7:121943868-121944538  | FEZF1; FEZF1-AS1            |
| cg16215203 | chr14:24803679-24804353   | ADCY4                       |
| cg16218721 | chr2:177017267-177017489  | HOXD4                       |
| cg16219246 | chr4:57396749-57397269    | THEGL                       |

|            |                           |                         |
|------------|---------------------------|-------------------------|
| cg16269733 | chr1:156616554-156616946  | BCAN                    |
| cg16281276 | chr11:7694712-7695685     | CYB5R2                  |
| cg16288089 | chr7:97361133-97363018    | TAC1                    |
| cg16306115 | chr6:24357720-24358309    | DCDC2; KAAG1            |
| cg16308533 | chr17:40838850-40839062   | CNTNAP1                 |
| cg16311536 | chr10:105344174-105345039 | NEURL1                  |
| cg16318112 | chr1:967967-970238        | AGRN                    |
| cg16328007 | chr1:41119853-41120136    | RIMS3                   |
| cg16332256 | chr4:9533767-9534520      |                         |
| cg16332936 | chr22:19748651-19749189   | TBX1                    |
| cg16334314 | chr6:84417598-84419378    | SNAP91                  |
| cg16339238 | chr20:23028404-23032218   | THBD                    |
| cg16345647 | chr21:38377938-38379437   | RIPPLY3                 |
| cg16348470 | chr1:34642383-34643024    | c1orf94                 |
| cg16358679 | chr15:78556406-78557542   | DNAJA4                  |
| cg16364121 | chr17:35291900-35300875   | LHX1; LHX1-DT           |
| cg16367511 | chr2:74425445-74426423    | MTHFD2                  |
| cg16376108 | chr16:54962423-54967805   | IRX5; CRNDE             |
| cg16390139 | chr6:74161087-74162090    | CGAS                    |
| cg16391955 | chr1:50880917-50881516    |                         |
| cg16399136 | chr1:151103686-151106100  | SEMA6C                  |
| cg16404157 | chr14:38724255-38725537   | CLEC14A                 |
| cg16407471 | chr11:43602546-43603215   | MIR129-2                |
| cg16441259 | chr8:11557853-11558252    | GATA4                   |
| cg16460359 | chr15:72611947-72612802   | CELF6                   |
| cg16475755 | chr14:77964572-77965670   | ISM2                    |
| cg16476975 | chr7:155164558-155167854  | BLACE                   |
| cg16485975 | chr20:25063839-25065525   | VSX1                    |
| cg16512615 | chr4:141489963-141490378  | UCP1                    |
| cg16519587 | chr6:26614014-26614851    |                         |
| cg16520815 | chr16:4732831-4733184     | MGRN1                   |
| cg16523704 | chr3:49314438-49314815    | USP4                    |
| cg16528511 | chr6:84562821-84563758    | RIPPLY2                 |
| cg16551483 | chr17:4981358-4981979     | ZFP3                    |
| cg16553435 | chr16:89267824-89268087   | SLC22A31                |
| cg16558432 | chr17:5403132-5404602     |                         |
| cg16561266 | chr17:62774367-62777797   | BPTFP1-KPNA2P3; ARHGAP2 |
| cg16566400 | chr11:119293321-119293943 | THY1; USP2-AS1          |
| cg16573782 | chr16:49314038-49316543   | CBLN1                   |
| cg16580499 | chr18:76737006-76741244   | SALL3                   |
| cg16615154 | chr6:40567267-40567580    |                         |
| cg16620382 | chr6:43211115-43211345    | TTNK1                   |
| cg16622920 | chr6:28956107-28956578    | HCG15                   |
| cg16624692 | chr11:65601070-65601551   | SNX32                   |
| cg16626067 | chr16:66612750-66613412   | KLF-CMTM1; CMTM1; CNMT  |
| cg16626884 | chr2:71693165-71694127    | DYSF                    |
| cg16633750 | chr7:2558372-2559967      | LFNG                    |
| cg16642791 | chr16:54962423-54967805   | IRX5; CRNDE             |
| cg16650717 | chr1:19970256-19971923    | NBL1; MICOS10-NBL1      |
| cg16651126 | chr7:27169573-27170638    | HOXA3; HOXA4; HOXA4-AS2 |

|            |                           |                      |
|------------|---------------------------|----------------------|
| cg16655791 | chr6:106429112-106429772  |                      |
| cg16655905 | chr19:38754847-38755699   | SPINT2               |
| cg16657538 | chr18:32847285-32848130   | ZSCAN30              |
| cg16676492 | chr15:34806491-34807382   |                      |
| cg16686137 | chr19:48837142-48837549   | TMEM143              |
| cg16688483 | chr8:102505513-102506430  | GRHL2                |
| cg16692735 | chr10:135259493-135260192 |                      |
| cg16692998 | chr19:19738573-19739821   | LAPAR2               |
| cg16697214 | chr7:50342896-50343456    | IKZF1                |
| cg16703135 | chr7:55516872-55517249    |                      |
| cg16703956 | chr5:1444679-1446648      | SLC6A3               |
| cg16709232 | chr17:72321949-72322461   | KIF19                |
| cg16732469 | chr17:4981358-4981979     | ZFP3                 |
| cg16734164 | chr19:41316544-41317318   | CYP2T1P              |
| cg16741041 | chr13:36919738-36921004   | SPART; SPART-AS1     |
| cg16755500 | chr17:27918162-27918398   | ABHD15-AS1           |
| cg16775746 | chr22:42353660-42353900   |                      |
| cg16778903 | chr15:72611947-72612802   | CELF6                |
| cg16779463 | chr17:75368689-75370506   | SEPTIN9              |
| cg16781647 | chr2:73151201-73152060    | EMX1                 |
| cg16788286 | chr8:142215692-142216299  |                      |
| cg16807089 | chr7:143582126-143582610  | TCAF1                |
| cg16820186 | chr11:17373020-17373665   | NCR3LG1              |
| cg16823083 | chr1:3566446-3569636      | TP73; WRAP73         |
| cg16829453 | chr17:48636104-48639279   | CACNA1G; CACNA1G-AS1 |
| cg16832267 | chr2:18059494-18060920    | KCNS3                |
| cg16844941 | chr8:11555100-11555603    | GATA4                |
| cg16848524 | chr8:145806259-145806713  | ARHGAP39             |
| cg16857858 | chr7:27212417-27214396    | HOXA10; HOXA10-HOXA9 |
| cg16859924 | chr17:20059029-20060060   | SPECC1               |
| cg16862295 | chr4:42399153-42400802    | SHISA3               |
| cg16867584 | chr19:49199965-49200184   | FUT2                 |
| cg16871763 | chr8:11536768-11538961    | GATA4                |
| cg16877924 | chr2:73429284-73430647    | NOTO                 |
| cg16882226 | chr2:101033607-101034296  | CHST10               |
| cg16886987 | chr21:38377938-38379437   | RIPPLY3              |
| cg16896847 | chr8:144510851-144513957  | MAFA                 |
| cg16909408 | chr3:134125488-134125871  |                      |
| cg16909733 | chr2:241459633-241460047  | ANKMY1               |
| cg16915821 | chr11:12029738-12030841   | DKK3                 |
| cg16919569 | chr4:174451829-174452962  | HAND2-AS1            |
| cg16928066 | chr2:73143056-73148260    | EMX1                 |
| cg16949120 | chr10:134597358-134602649 | NKX6-2               |
| cg16964348 | chr7:24323559-24325080    | NPY                  |
| cg16966315 | chr7:149112307-149112545  |                      |
| cg16969368 | chr17:57642721-57643294   | DHX40                |
| cg16969586 | chr18:10726248-10726667   | PIEZO2               |
| cg16977570 | chr13:24152900-24154140   | TNFRSF19             |
| cg16980360 | chr17:29298047-29298606   | RNF135               |
| cg17003293 | chr14:36002599-36005013   | INSM2                |

|            |                           |                              |
|------------|---------------------------|------------------------------|
| cg17011276 | chr5:140797163-140797701  | 2,3,4,5,6,7,8,9,10; PCDHGB1, |
| cg17019053 | chr2:74875129-74875562    | M1AP                         |
| cg17021218 | chr10:88730555-88731632   | AGAP11; ADIRF                |
| cg17025835 | chr7:123672064-123673691  | TMEM229A                     |
| cg17030173 | chr5:16179065-16180420    | MARCH11                      |
| cg17034390 | chr6:30095174-30095610    |                              |
| cg17035412 | chr7:26415747-26416891    |                              |
| cg17039236 | chr18:77547966-77549038   |                              |
| cg17054969 | chr12:48397890-48398731   | COL2A1                       |
| cg17062279 | chr17:3658427-3658685     | ITGAE                        |
| cg17073392 | chr15:69323960-69324232   | NOX5                         |
| cg17078116 | chr8:24770909-24772547    | NEFM                         |
| cg17078427 | chr3:170136243-170137886  | CLDN11                       |
| cg17088631 | chr1:53098630-53099303    | SHISAL2A                     |
| cg17098147 | chr10:22634001-22634862   | SPAG6                        |
| cg17101296 | chr8:145925411-145926101  |                              |
| cg17104258 | chr1:167090576-167091010  | DUSP27                       |
| cg17105755 | chr2:74875129-74875562    | M1AP                         |
| cg17124224 | chr15:83951981-83953930   | BNC1                         |
| cg17137424 | chr1:231297813-231299777  | TRIM67                       |
| cg17147211 | chr1:119543822-119544339  |                              |
| cg17161250 | chr2:106681983-106682403  | ECRG4                        |
| cg17162576 | chr1:66998729-66999060    | SGIP1                        |
| cg17172980 | chr3:196755678-196757374  | MELTF                        |
| cg17176016 | chr6:108437999-108441208  |                              |
| cg17180977 | chr1:228134423-228136282  | WNT9A                        |
| cg17186168 | chr2:11809607-11810433    | NTSR2                        |
| cg17187287 | chr4:115519423-115520932  | UGT8                         |
| cg17199181 | chr18:74799145-74800038   | MBP                          |
| cg17202086 | chr11:77122737-77123088   | PAK1                         |
| cg17222164 | chr17:43339125-43339832   | SPATA32; MAP3K14-AS1         |
| cg17222500 | chr12:85306283-85306829   | SLC6A15                      |
| cg17228900 | chr6:391189-393790        | IRF4                         |
| cg17236169 | chr11:64480200-64481344   | NRXN2                        |
| cg17241776 | chr13:51417372-51418149   | DLEU7; DLEU7-AS1             |
| cg17246382 | chr15:78556406-78557542   | DNAJA4                       |
| cg17264670 | chr6:153450993-153452792  | RGS17                        |
| cg17266581 | chr18:74799145-74800038   | MBP                          |
| cg17267805 | chr10:44879715-44882391   | CXCL12                       |
| cg17269633 | chr17:42733487-42734626   | MEIOC                        |
| cg17275781 | chr14:103739579-103740892 |                              |
| cg17277199 | chr2:24397646-24398194    | FAM228A                      |
| cg17285225 | chr3:8808962-8811280      | OXTR                         |
| cg17292758 | chr19:49636225-49636694   | PPFIA3                       |
| cg17293936 | chr3:185911345-185912228  | DGKG                         |
| cg17295225 | chr6:137814356-137815202  | OLIG3                        |
| cg17299899 | chr18:76737006-76741244   | SALL3                        |
| cg17299935 | chr17:74533282-74534566   | PRCD; CYGB                   |
| cg17300544 | chr17:75368689-75370506   | SEPTIN9                      |
| cg17301902 | chr9:80262447-80263701    | GNA14                        |



|            |                           |                       |
|------------|---------------------------|-----------------------|
| cg17302155 | chr6:100060980-100062657  | PRDM13                |
| cg17306261 | chr14:65016517-65016909   | PPP1R36               |
| cg17315500 | chr12:103359249-103359629 |                       |
| cg17321883 | chr3:49755764-49757317    | AMIGO3; GMPPB; RNF123 |
| cg17333109 | chr14:37049334-37051726   | NKX2-8                |
| cg17368760 | chr20:23028404-23032218   | THBD                  |
| cg17373442 | chr3:142837886-142840838  | CHST2                 |
| cg17380661 | chr6:100912072-100913337  | SIM1                  |
| cg17384889 | chr6:28226980-28227483    | NKAPL; ZKSCAN4        |
| cg17386213 | chr6:108485672-108490539  | NR2E1                 |
| cg17403609 | chr5:180075689-180076906  | FLT4                  |
| cg17409893 | chr19:42901017-42901375   | LIPE-AS1              |
| cg17419241 | chr19:19738573-19739821   | LAPAR2                |
| cg17429382 | chr19:3785512-3786653     | MATK                  |
| cg17437939 | chr7:97361133-97363018    | TAC1                  |
| cg17438030 | chr5:72526204-72526497    |                       |
| cg17466857 | chr7:27225051-27225629    | HOXA11; HOXA11-AS     |
| cg17477445 | chr12:64061837-64062774   | DPY19L2               |
| cg17478228 | chr19:11590296-11593643   | ELAVL3                |
| cg17478979 | chr6:149771837-149772855  | ZC3H12D               |
| cg17480760 | chr8:86350766-86351196    | CA3                   |
| cg17493885 | chr5:176558853-176561652  | NSD1                  |
| cg17495087 | chr8:96085270-96085747    | NDUFAF6               |
| cg17503456 | chr3:138663719-138666346  | FOXL2; FOXL2NB        |
| cg17536595 | chr6:43612715-43613366    | RSPH9                 |
| cg17538572 | chr10:94833273-94835256   | CYP26A1               |
| cg17542408 | chr11:78673008-78673213   | TENM4                 |
| cg17555373 | chr13:53774265-53776345   |                       |
| cg17555825 | chr5:76923888-76924502    |                       |
| cg17566118 | chr10:8091375-8098329     | GATA3; GATA3-AS1      |
| cg17567560 | chr10:105036629-105038084 | INA                   |
| cg17577122 | chr22:19510872-19512254   | CLDN5                 |
| cg17594131 | chr17:43044370-43046424   | C1QL1                 |
| cg17603689 | chr1:50882998-50883426    | DMRTA2                |
| cg17630392 | chr5:32709911-32714450    | NPR3                  |
| cg17666539 | chr19:7926591-7928752     | EVI5L                 |
| cg17689799 | chr2:27529084-27531465    | TRIM54; UCN           |
| cg17694351 | chr7:27252682-27253835    |                       |
| cg17694795 | chr8:67873389-67875600    | TCF24                 |
| cg17697633 | chr6:10419400-10420323    | TFAP2A                |
| cg17712694 | chr5:16179065-16180420    | MARCH11               |
| cg17716617 | chr1:33219428-33220028    | KIAA1522              |
| cg17737146 | chr3:169529876-169530435  | LRRC34                |
| cg17737681 | chr2:172951290-172952159  | DLX1                  |
| cg17757602 | chr5:42951077-42952410    |                       |
| cg17760405 | chr6:100914947-100915245  |                       |
| cg17768491 | chr19:41018526-41019486   | SPTBN4                |
| cg17780246 | chr19:54481413-54481955   | CACNG8                |
| cg17780956 | chr4:156297602-156298094  | MAP9                  |
| cg17787134 | chr17:47072821-47076042   | IGF2BP1               |

|            |                           |                    |
|------------|---------------------------|--------------------|
| cg17794299 | chr20:623089-623398       |                    |
| cg17796010 | chr20:26188639-26190348   | MIR663AHG; MIR6633 |
| cg17800654 | chr1:50884229-50891471    | DMRTA2             |
| cg17802942 | chr3:138663719-138666346  | FOXL2; FOXL2NB     |
| cg17812788 | chr17:40332598-40333471   | KCNH4              |
| cg17818432 | chrX:134155997-134156602  | RTL8               |
| cg17840719 | chr5:178367621-178368725  | ZNF454             |
| cg17853216 | chr10:81002110-81003687   | ZMIZ1              |
| cg17858328 | chr1:92945908-92952609    | GFI1               |
| cg17882660 | chr13:100637113-100637472 | ZIC2               |
| cg17885226 | chr6:105388191-105389545  | LIN28B; LIN28B-AS1 |
| cg17890928 | chr17:48545571-48546900   | ACSF2; CHAD        |
| cg17900356 | chr3:53190510-53190764    |                    |
| cg17904852 | chr3:48698336-48701667    | CELSR3             |
| cg17912835 | chr2:105478601-105479188  |                    |
| cg17916490 | chr2:11809607-11810433    | NTSR2              |
| cg17928883 | chr5:2038528-2038949      |                    |
| cg17928920 | chr1:967967-970238        | AGRN               |
| cg17930034 | chr14:65016517-65016909   | PPP1R36            |
| cg17935297 | chr19:19651843-19652047   | CILP2              |
| cg17941572 | chr1:63782395-63790471    | FOXD3; FDX3-AS1    |
| cg17942573 | chr5:16935556-16936408    | MYO10              |
| cg17960926 | chr19:42901017-42901375   | LIPE-AS1           |
| cg17965019 | chr6:27858167-27858564    | H3C12              |
| cg17968795 | chr2:99552186-99553831    | KIAA1211L          |
| cg17969084 | chr7:27190275-27191115    | HOXA-AS3           |
| cg17971015 | chr19:12305553-12306304   |                    |
| cg17974166 | chr1:23279554-23280569    | LACTBL1            |
| cg17975443 | chr17:59531724-59535254   | TBX4               |
| cg17982102 | chr18:9707753-9709311     | RAB31              |
| cg17985646 | chr7:35292986-35294674    | TBX20              |
| cg17988460 | chr10:134597358-134602649 | NKX6-2             |
| cg17993027 | chr8:82542799-82543475    | IMPA1P1            |
| cg17996619 | chr10:134597358-134602649 | NKX6-2             |
| cg18004756 | chr8:102504479-102504841  | GRHL2              |
| cg18008019 | chr13:100641335-100642188 |                    |
| cg18009321 | chr20:25128765-25129610   |                    |
| cg18016826 | chr5:176558853-176561652  | NSD1               |
| cg18028999 | chr15:81426500-81426702   | CFAP161            |
| cg18030386 | chr19:4944133-4944498     | UHRF1              |
| cg18035229 | chr8:70981874-70984888    | PRDM14             |
| cg18049676 | chr5:177540208-177541234  | N4BP3              |
| cg18055610 | chr6:30095174-30095610    |                    |
| cg18081258 | chr14:21492736-21494270   | NDRG2              |
| cg18096962 | chr5:72526204-72526497    |                    |
| cg18106312 | chr14:51560117-51562487   | TRIM9              |
| cg18110168 | chrX:50556225-50557179    | SHROOM4            |
| cg18116971 | chr19:3285857-3286121     | CELF5              |
| cg18118033 | chr1:26686517-26687281    | CRYBG2             |
| cg18129621 | chr22:29875920-29877242   | NEFH               |

|            |                           |                         |
|------------|---------------------------|-------------------------|
| cg18146843 | chr1:53098630-53099303    | SHISAL2A                |
| cg18156204 | chr17:71948479-71949255   |                         |
| cg18177414 | chr7:149389655-149389976  |                         |
| cg18182111 | chr5:37834672-37835128    | GDNF; GDNF-AS1          |
| cg18182148 | chr1:92945908-92952609    | GFI1                    |
| cg18202336 | chr15:99190447-99194559   | IGF1R; IRAIN            |
| cg18209835 | chr7:6543016-6543598      | GRID2IP                 |
| cg18210732 | chr11:69517841-69519929   | FGF19                   |
| cg18233405 | chr8:98289605-98290404    | TSPYL5                  |
| cg18235050 | chr12:126675562-126676195 |                         |
| cg18245660 | chr8:54791846-54795141    | RGS20                   |
| cg18247055 | chr10:22634001-22634862   | SPAG6                   |
| cg18255595 | chr13:20735044-20736157   | GJA3                    |
| cg18260625 | chr5:42951077-42952410    |                         |
| cg18269826 | chr15:101458287-101460223 | LRRK1                   |
| cg18279094 | chr1:63782395-63790471    | FOXD3; FOXD3-AS1        |
| cg18285309 | chr1:40156931-40158514    | HPCAL4                  |
| cg18309286 | chr11:77122737-77123088   | PAK1                    |
| cg18314424 | chr4:184718264-184719754  | STOX2                   |
| cg18326021 | chr10:106399568-106402812 | SORCS3                  |
| cg18331004 | chr20:1783825-1784552     |                         |
| cg18339788 | chr19:41641308-41642082   |                         |
| cg18342279 | chr4:48492118-48493589    | ZAR1                    |
| cg18342462 | chr11:111385338-111385712 | BTG4; c11orf88          |
| cg18343437 | chr8:142528186-142529029  |                         |
| cg18349835 | chr7:158936508-158938492  | VIPR2                   |
| cg18350739 | chr11:68622723-68623252   |                         |
| cg18354742 | chr19:38754847-38755699   | SPINT2                  |
| cg18356785 | chr11:47611139-47612438   | C1QTNF4                 |
| cg18356974 | chr7:128809090-128809393  | TSPAN33                 |
| cg18358869 | chr10:102807775-102808271 |                         |
| cg18365406 | chr19:11471906-11472299   | PLPPR2                  |
| cg18366919 | chr19:15344092-15344419   | EPHX3                   |
| cg18368487 | chr10:128993506-128995167 | DOCK1                   |
| cg18406197 | chr3:13590415-13591008    | FBLN2                   |
| cg18409528 | chr2:74740456-74743795    | TLX2                    |
| cg18410627 | chr9:129677707-129678009  | RALGPS1                 |
| cg18418538 | chr19:48996865-48997114   | LMTK3                   |
| cg18423852 | chr7:150652808-150653080  | KCNH2                   |
| cg18424634 | chr3:147126989-147128999  | ZIC1                    |
| cg18429863 | chr8:73448660-73449725    | KCNB2                   |
| cg18438793 | chr1:40149432-40150013    | HPCAL4                  |
| cg18443359 | chr5:134374386-134376751  | c5orf66                 |
| cg18449964 | chr18:72916108-72917233   | ZADH2                   |
| cg18451114 | chr1:38510103-38513642    | POU3F1                  |
| cg18454916 | chr8:74005022-74005856    | SBSPON                  |
| cg18456523 | chr5:54516268-54516919    | MCIDAS                  |
| cg18467168 | chr3:13114628-13115245    | IQSEC1                  |
| cg18468354 | chr14:36993489-36994488   |                         |
| cg18470455 | chrX:102000690-102001558  | BHLHB9; ARM CX5-GPRASP2 |

|            |                           |                           |
|------------|---------------------------|---------------------------|
| cg18471993 | chr6:100917206-100917523  |                           |
| cg18477204 | chr14:70038109-70040302   | CCDC177                   |
| cg18485193 | chr5:16935556-16936408    | MYO10                     |
| cg18485844 | chr11:2290105-2292932     | ASCL2                     |
| cg18486102 | chr12:50297581-50297988   | FAIM2                     |
| cg18488157 | chr6:29521111-29521833    | OR2I1P                    |
| cg18489434 | chr14:77227570-77228691   | VASH1                     |
| cg18514820 | chr10:17270431-17272617   | VIM; VIM-AS1              |
| cg18529845 | chr2:31805294-31806403    | SRD5A2                    |
| cg18536148 | chr17:59531724-59535254   | TBX4                      |
| cg18536496 | chrX:101906002-101907017  | ARMCX5-GPRASP2; GPRASP1   |
| cg18557131 | chr13:100620242-100624348 | ZIC5                      |
| cg18558647 | chr15:93198375-93199181   | FAM174B                   |
| cg18559739 | chr6:4775132-4777550      | CDYL                      |
| cg18560204 | chr15:83951981-83953930   | BNC1                      |
| cg18564989 | chr1:226411008-226411880  | MIXL1                     |
| cg18567682 | chr4:128544032-128544903  |                           |
| cg18579862 | chr19:58094740-58095764   | ZIK1                      |
| cg18583378 | chr7:150715309-150716404  | ATG9B                     |
| cg18587476 | chr2:24397646-24398194    | FAM228A                   |
| cg18588589 | chr6:29521111-29521833    | OR2I1P                    |
| cg18591496 | chr19:41595896-41596140   | CYP2A13                   |
| cg18603228 | chr3:13590415-13591008    | FBLN2                     |
| cg18607529 | chr7:50343758-50344519    | IKZF1                     |
| cg18620571 | chr14:103593235-103593923 | TNFAIP2                   |
| cg18623980 | chr2:45240373-45241579    |                           |
| cg18630040 | chr6:46702737-46703316    | PLA2G7                    |
| cg18630667 | chr19:37095681-37096589   | NF529; ZNF529-AS1; ZNF382 |
| cg18633684 | chr12:104697349-104697984 | TXNRD1; EID3              |
| cg18638914 | chr4:778662-780592        | CPLX1                     |
| cg18647259 | chr17:36609706-36610320   | ARHGAP23                  |
| cg18671950 | chr15:48936811-48938577   | FBN1                      |
| cg18675043 | chr10:105452339-105453230 | SH3PXD2A                  |
| cg18675097 | chr6:28226980-28227483    | NKAPL; ZKSCAN4            |
| cg18691800 | chr6:17280740-17282334    | RBM24                     |
| cg18694169 | chr6:28226980-28227483    | NKAPL; ZKSCAN4            |
| cg18696576 | chr6:34202568-34206193    | HMGA1                     |
| cg18716164 | chr19:30015782-30021367   | VSTM2B                    |
| cg18723937 | chr7:37955623-37956555    | SFRP4; EPDR1              |
| cg18724565 | chr7:5632336-5634555      | FSCN1                     |
| cg18725867 | chr5:37834672-37835128    | GDNF; GDNF-AS1            |
| cg18726691 | chr15:90039465-90039984   | RHCG                      |
| cg18732064 | chr14:23355739-23356402   | REM2                      |
| cg18732172 | chr11:504190-504659       | RNH1                      |
| cg18740893 | chr3:136537560-136539204  | SLC35G2                   |
| cg18770350 | chr1:236849473-236850323  | ACTN2                     |
| cg18772588 | chr20:61806255-61810867   | MIR124-3                  |
| cg18786873 | chr1:110610266-110613303  | ALX3                      |
| cg18788664 | chr1:221067448-221068185  |                           |
| cg18790597 | chr4:17782643-17783624    | FAM184B                   |

|            |                           |                          |
|------------|---------------------------|--------------------------|
| cg18794404 | chr10:22540708-22542739   |                          |
| cg18798922 | chr2:171569878-171573904  | SP5                      |
| cg18803104 | chr6:28956107-28956578    | HCG15                    |
| cg18810664 | chr10:31073836-31074433   |                          |
| cg18811550 | chr7:27198183-27198514    |                          |
| cg18815647 | chr13:25743999-25746127   | AMER2                    |
| cg18815943 | chr1:47881897-47883065    | FOXE3                    |
| cg18818834 | chr6:52226754-52228006    | PAQR8                    |
| cg18833573 | chr8:144822012-144822805  | FAM83H-AS1; IQANK1       |
| cg18840956 | chr5:95768875-95769080    | PCSK1                    |
| cg18853935 | chr7:25896714-25896925    |                          |
| cg18855096 | chr9:124061806-124062229  | GSN                      |
| cg18859089 | chr2:232276743-232277135  |                          |
| cg18862481 | chr3:129693128-129694841  | TRH                      |
| cg18868483 | chr6:71665361-71667132    | B3GAT2                   |
| cg18892212 | chr16:31498651-31500564   | SLC5A2                   |
| cg18914211 | chr6:29795554-29796594    | HLA-G                    |
| cg18918321 | chr8:41424342-41425300    |                          |
| cg18932798 | chr10:105036629-105038084 | INA                      |
| cg18940113 | chr2:161263872-161264460  | RBMS1                    |
| cg18949300 | chr6:167275721-167276626  | RPS6KA2                  |
| cg18952647 | chr15:83951981-83953930   | BNC1                     |
| cg18952796 | chr7:98245806-98247759    | NPTX2                    |
| cg18953784 | chr11:64739011-64739750   | MAJIN                    |
| cg18956481 | chr20:52789253-52790986   | CYP24A1                  |
| cg18969232 | chr2:45155196-45157049    |                          |
| cg18988170 | chr18:21718863-21719550   | CABYR                    |
| cg18991611 | chr8:49468684-49468959    |                          |
| cg19003797 | chr6:137818168-137819372  |                          |
| cg19012731 | chr7:86688833-86689238    | KIAA1324L                |
| cg19029181 | chr3:147130343-147130577  | ZIC1                     |
| cg19037922 | chr4:108852496-108853387  | CYP2U1                   |
| cg19043574 | chr2:99438298-99439884    | KIAA1211L                |
| cg19045644 | chr4:57975861-57976916    | IGFBP7; IGFBP7-AS1       |
| cg19046725 | chr3:189838081-189838879  | P3H2; P3H2-AS1           |
| cg19047707 | chr2:233350279-233352974  | ECEL1                    |
| cg19059495 | chr6:30095174-30095610    |                          |
| cg19063061 | chr19:49935752-49936275   | SLC17A7                  |
| cg19078576 | chr5:17217789-17219021    | BASP1; BASP1-AS1         |
| cg19127283 | chr3:32858195-32860506    | TRIM71                   |
| cg19129369 | chr4:155664820-155665833  | LRAT                     |
| cg19142026 | chr7:27169573-27170638    | HOXA3; HOXA4, HOXA4-AS2  |
| cg19153828 | chr2:127782614-127782829  |                          |
| cg19155007 | chr3:183542497-183543804  | MAP6D1                   |
| cg19156875 | chr17:43971411-43975040   | MAPT; MAPT-AS1; MAPT-IT1 |
| cg19157853 | chr11:126286452-126286870 |                          |
| cg19186145 | chr2:45169506-45171884    | SIX3                     |
| cg19198568 | chr7:28995306-28998541    | TRIL                     |
| cg19201719 | chr9:214587-215431        | DOCK8; DOCK8-AS1         |
| cg19244428 | chr6:3227026-3229688      | TUBB2B                   |

|            |                           |                |
|------------|---------------------------|----------------|
| cg19250799 | chr1:47909713-47911020    |                |
| cg19250989 | chr1:147752860-147753165  | NBPF8          |
| cg19267596 | chr19:15334123-15334822   |                |
| cg19267861 | chr20:61806255-61810867   |                |
| cg19275261 | chr18:5628325-5630785     | EPB41L3        |
| cg19281363 | chr13:42030914-42032667   | RGCC2          |
| cg19283506 | chr2:101033607-101034296  | CHST10         |
| cg19287823 | chr6:155316300-155317197  | TIAM2          |
| cg19300568 | chr4:2059929-2063181      | NAT8L          |
| cg19306047 | chr19:19738573-19739821   | LAPAR2         |
| cg19320476 | chr11:82443436-82444976   | FAM181B        |
| cg19337852 | chr19:38754847-38755699   | SPINT2         |
| cg19355186 | chr19:12305553-12306304   |                |
| cg19360104 | chr1:154474108-154475699  | TDRD10; SHE    |
| cg19367047 | chr19:5076032-5076905     | KDM4B          |
| cg19370054 | chr2:98962874-98964187    | CNGA3          |
| cg19375537 | chr1:46951169-46951792    |                |
| cg19380001 | chr1:50884229-50891471    | DMRTA2         |
| cg19389884 | chr11:1357627-1359081     |                |
| cg19396878 | chr19:40971477-40973393   | SPTBN4; BLVRB  |
| cg19397703 | chr19:43967248-43968625   | LYPD3          |
| cg19402991 | chr2:164204741-164205039  |                |
| cg19403104 | chr19:50030982-50031300   | RCN3           |
| cg19423622 | chr7:158361910-158362970  | PTPRN2         |
| cg19424265 | chr20:825268-826276       | FAM110A        |
| cg19429281 | chr19:53496733-53497028   | ZNF702P        |
| cg19435033 | chr17:19648140-19648492   | ALDH3A1        |
| cg19442495 | chr3:142837886-142840838  | CHST2          |
| cg19451673 | chr12:48397890-48398731   | COL2A1         |
| cg19456540 | chr14:60975733-60978180   | SIX6           |
| cg19480724 | chr7:27284640-27286237    | EVX1           |
| cg19485202 | chr19:18899038-18902284   | COMP           |
| cg19499452 | chr14:105830606-105830846 | PACS2          |
| cg19499748 | chr7:28995306-28998541    | TRIL           |
| cg19504702 | chr5:153862143-153862451  |                |
| cg19507206 | chr10:103043991-103044480 |                |
| cg19513834 | chr2:105468852-105473488  | POU3F3; PANTR1 |
| cg19517718 | chr2:1746834-1748971      | PXDN           |
| cg19519964 | chr2:223288923-223290013  | SGPP2          |
| cg19544662 | chr2:88751336-88752865    | FOXI3          |
| cg19545623 | chr4:40751843-40752493    | NSUN7          |
| cg19553869 | chr11:66034752-66035054   | KLC2; RAB1B    |
| cg19554255 | chr17:75368689-75370506   | SEPTIN9        |
| cg19585816 | chr8:41753341-41755250    | ANK1           |
| cg19590532 | chr1:25255528-25259005    | RUNX3          |
| cg19590598 | chr2:127782614-127782829  |                |
| cg19592439 | chr3:138663719-138666346  | FOXL2; FOXL2NB |
| cg19594218 | chr1:62660556-62660946    | L1TD1          |
| cg19595750 | chr12:133065844-133066393 | FBRSL1         |
| cg19609502 | chr22:40390485-40391490   | FAM83F         |

|            |                           |                      |
|------------|---------------------------|----------------------|
| cg19610869 | chr5:157098264-157099041  | SOX30                |
| cg19619405 | chr12:43944720-43946285   | ADAMTS20             |
| cg19628148 | chr3:126113548-126113967  | CFAP100; CCDC37-DT   |
| cg19632532 | chr6:3227026-3229688      | TUBB2B               |
| cg19636302 | chr19:46032305-46032855   | OPA3                 |
| cg19647755 | chr8:49293202-49293547    |                      |
| cg19651694 | chr11:71954817-71955659   | PHOX2A               |
| cg19656282 | chr2:74740456-74743795    | TLX2                 |
| cg19657174 | chr22:19746156-19746369   | TBX1                 |
| cg19665644 | chr11:13030331-13032584   | RASSF10; RASSF10-DT  |
| cg19685491 | chr12:2800140-2801062     | CACNA1C; CACNA1C-AS1 |
| cg19690984 | chr6:29521111-29521833    | OR2I1P               |
| cg19701540 | chr10:134597358-134602649 | NKX6-2               |
| cg19706516 | chr1:151103686-151106100  | SEMA6C               |
| cg19712603 | chr13:53419898-53422872   | PCDH8                |
| cg19714957 | chr19:19843483-19843943   | ZNF14                |
| cg19715410 | chr1:29138502-29139348    | OPRD1                |
| cg19717586 | chr11:131780329-131781532 | NTM                  |
| cg19722720 | chr1:113050814-113052301  | WNT2B                |
| cg19729116 | chr6:26501726-26502107    | BTN1A1               |
| cg19734163 | chr7:138720045-138721019  | ZC3HAV1L             |
| cg19751300 | chr18:44336184-44337110   | ST8SIA5              |
| cg19752891 | chr19:4304543-4305122     | FSD1                 |
| cg19756821 | chr1:54940347-54940753    |                      |
| cg19760241 | chr17:35291900-35300875   | LHX1; LHX1-DT        |
| cg19761115 | chr5:178487147-178487921  | ZNF354C              |
| cg19761848 | chr2:237071795-237078762  | GBX2                 |
| cg19763319 | chr19:50316212-50316469   | FUZ                  |
| cg19763809 | chr2:98703355-98703889    | VWA3B                |
| cg19767215 | chr19:38754847-38755699   | SPINT2               |
| cg19779211 | chr11:2465172-2465648     | KCNQ1                |
| cg19788741 | chr5:101632050-101632373  | SLCO4C1              |
| cg19796981 | chr22:50438258-50438776   | IL17REL              |
| cg19806642 | chr5:178421226-178422337  | GRM6                 |
| cg19807257 | chr1:46951169-46951792    |                      |
| cg19809453 | chr1:6507208-6509186      | ESPN                 |
| cg19820372 | chr11:111410933-111412199 | LAYN                 |
| cg19837790 | chr10:97802872-97804262   | CCNJ; ENTPD1-AS1     |
| cg19841005 | chr19:3687787-3688262     | PIP5K1C              |
| cg19850348 | chr15:55879793-55881228   | PYGO1                |
| cg19851909 | chr11:94134227-94134848   | GPR83                |
| cg19852958 | chr4:13543563-13546494    | NKX3-2               |
| cg19859290 | chr11:20618198-20619920   | SLC6A5               |
| cg19861117 | chr19:46456210-46456503   | NOVA2                |
| cg19863210 | chr8:142138209-142139342  | DENND                |
| cg19866866 | chr1:182025605-182026511  | ZNF648               |
| cg19867649 | chr11:12029738-12030841   | DKK3                 |
| cg19870512 | chr12:4918274-4919657     | KCNA6                |
| cg19875368 | chr6:91320891-91321219    |                      |
| cg19879075 | chr10:73846807-73848233   | SPOCK2               |

|            |                           |                  |
|------------|---------------------------|------------------|
| cg19883813 | chr10:8091375-8098329     | GATA3; GATA3-AS1 |
| cg19885761 | chr5:175223610-175224679  | CPLX2            |
| cg19900615 | chr1:41267920-41268398    | KCNQ4            |
| cg19901801 | chr1:114696887-114697185  | SYT6             |
| cg19904122 | chr19:3285857-3286121     | CELF5            |
| cg19908577 | chr4:115519423-115520932  | UGT8             |
| cg19908812 | chr4:164252955-164253471  | NPY1R            |
| cg19909787 | chr10:124907284-124911035 | HMX2             |
| cg19925849 | chr19:54445232-54445745   | CACNG7           |
| cg19929126 | chr7:28995306-28998541    | TRIL             |
| cg19947104 | chr11:17756057-17758286   | KCNC1            |
| cg19954017 | chr17:80332183-80333671   | UTS2R            |
| cg19955500 | chr5:32709911-32714450    | NPR3             |
| cg19961043 | chr17:48545571-48546900   | ACSF2; CHAD      |
| cg19968840 | chr15:45408574-45409528   | DUOXA2           |
| cg19974428 | chr7:98467024-98468058    | TMEM130          |
| cg19975933 | chr11:74022429-74022703   | P4HA3            |
| cg19988449 | chr15:83951981-83953930   | BNC1             |
| cg19996355 | chr19:19729128-19729814   | PBX4             |
| cg19998368 | chr12:64784011-64784664   | C12orf56         |
| cg20000718 | chr4:41869175-41869459    |                  |
| cg20002504 | chr2:241496577-241497600  | ANKMY1           |
| cg20011402 | chr10:17495408-17496721   | ST8SIA6          |
| cg20014398 | chr11:31825744-31826967   | PAX6             |
| cg20018469 | chr10:17270431-17272617   | VIM; VIM-AS1     |
| cg20019985 | chr11:32008803-32009044   | RCN1             |
| cg20022589 | chr18:21718863-21719550   | CABYR            |
| cg20049415 | chr20:21376359-21378245   | NKX2-4           |
| cg20056542 | chr15:53080459-53083699   | ONECUT1          |
| cg20070026 | chr14:102247661-102248279 | PPP2R5C          |
| cg20075156 | chr4:11430236-11431256    | HS3ST1           |
| cg20078466 | chr7:50343758-50344519    | IKZF1            |
| cg20080624 | chr7:96650222-96651551    | DLX5             |
| cg20085077 | chrX:100740222-100740601  | ARMCX4           |
| cg20092531 | chr18:54788960-54789194   |                  |
| cg20092892 | chr12:52257745-52258128   |                  |
| cg20102877 | chr2:27665252-27665670    | KRTCAP3          |
| cg20106459 | chr19:55865825-55866324   | COX6B2           |
| cg20113824 | chr8:70946891-70947299    |                  |
| cg20122943 | chr19:54483022-54483572   | CACNG8           |
| cg20129213 | chr8:104510871-104513913  | RIMS2            |
| cg20146541 | chr1:248020331-248021252  | TRIM58           |
| cg20150591 | chr7:3341451-3341733      | SDK1             |
| cg20166714 | chr12:113592204-113592620 | CFAP73           |
| cg20182358 | chr3:158288801-158289271  | MLF1             |
| cg20185461 | chr19:18899038-18902284   | COMP             |
| cg20192747 | chr18:44772993-44775577   | SKOR2            |
| cg20209308 | chr22:19136294-19138512   | GSC2             |
| cg20219381 | chr8:101117923-101118693  | RGS22            |
| cg20222926 | chr7:121945346-121946235  | FEZF1; FEZF1-AS1 |



|            |                           |                    |
|------------|---------------------------|--------------------|
| cg20227255 | chr6:43142014-43142217    | SRF                |
| cg20232102 | chr19:38746639-38747379   | PPP1R14A           |
| cg20232986 | chr6:100915603-100915883  |                    |
| cg20247486 | chr1:119543822-119544339  |                    |
| cg20255775 | chr12:48397890-48398731   | COL2A1             |
| cg20270188 | chr1:156611640-156612447  | BCAN               |
| cg20275528 | chr17:75368689-75370506   | SEPTIN9            |
| cg20284629 | chr1:47909713-47911020    |                    |
| cg20289688 | chr11:17740790-17743779   | MYOD1              |
| cg20291049 | chr2:105468852-105473488  | POU3F3; PANTR1     |
| cg20297199 | chr14:54420185-54422958   | BMP4               |
| cg20300175 | chr17:27918162-27918398   | ANKRD13B-AS1       |
| cg20305024 | chr15:40573629-40576118   | ANKRD63            |
| cg20318845 | chr2:45235512-45237792    | SIX2               |
| cg20340508 | chr21:34442207-34444543   | OLIG1              |
| cg20358834 | chr11:66623621-66626614   | LRNF4              |
| cg20365074 | chr2:189156417-189157719  | GULP1              |
| cg20370678 | chr17:58216297-58216505   |                    |
| cg20377305 | chr7:96650222-96651551    | DLX5               |
| cg20381020 | chr11:66623621-66626614   | LRNF4              |
| cg20383948 | chr21:46897842-46898158   | COL18A1            |
| cg20384898 | chr6:1624186-1625468      | GMDS               |
| cg20392240 | chr8:104383410-104384109  | CTHRC1             |
| cg20395967 | chr20:26188639-26190348   | MIR663AHG; MIR6633 |
| cg20399509 | chr21:47717236-47718059   | YBEY               |
| cg20399616 | chr12:25055600-25056246   | BCAT1              |
| cg20401551 | chr22:20790639-20792665   | SCARF2             |
| cg20419623 | chr20:48598960-48599657   | SNAI1              |
| cg20442599 | chr6:108478524-108479558  | OSTM1-AS1          |
| cg20443254 | chr12:108168987-108169570 | ASCL4              |
| cg20447655 | chr8:104383410-104384109  | CTHRC1             |
| cg20449685 | chr19:58545116-58545897   | ZSCAN1             |
| cg20449692 | chr3:170136243-170137886  | CLDN11             |
| cg20482698 | chr1:236849473-236850323  | ACTN2              |
| cg20486569 | chr22:19510872-19512254   | CLDN5              |
| cg20491838 | chr6:1604607-1615866      | FOXC1              |
| cg20495645 | chr22:45403037-45406372   | PHF21B             |
| cg20527270 | chr8:49468684-49468959    |                    |
| cg20530204 | chr6:33244678-33245554    | B3GALT4            |
| cg20532999 | chr15:69323960-69324232   | NOX5               |
| cg20536041 | chr2:45028956-45029318    |                    |
| cg20555674 | chr17:37321483-37322099   | ARL5C              |
| cg20555682 | chr11:8289533-8290322     | LMO1               |
| cg20557801 | chr15:68115486-68122575   | SKOR1              |
| cg20569128 | chrX:136655910-136657085  | ZIC3               |
| cg20569287 | chr8:144510851-144513957  | MAFA               |
| cg20574490 | chr8:102504479-102504841  | GRHL2              |
| cg20577019 | chr1:150121696-150123078  | PLEKHO1            |
| cg20585530 | chr14:60975733-60978180   | SIX6               |
| cg20585869 | chr8:24770909-24772547    | NEFM               |

|            |                           |                    |
|------------|---------------------------|--------------------|
| cg20597013 | chr1:244893442-244894366  |                    |
| cg20611911 | chr1:3566446-3569636      | TP73; WRAP73       |
| cg20616414 | chr9:95946148-95947835    | WNK2               |
| cg20636352 | chr2:200468552-200468958  |                    |
| cg20648847 | chr11:66326640-66326840   | ACTN3              |
| cg20673829 | chr7:158936508-158938492  | VIPR2              |
| cg20684180 | chr3:38080629-38081187    | DLEC1              |
| cg20699586 | chr1:227748424-227748860  |                    |
| cg20701182 | chr2:24300061-24300294    | FAM228B; SF3B6     |
| cg20707679 | chr19:3434930-3435417     | NFIC               |
| cg20744625 | chr10:64574661-64578778   | EGR2               |
| cg20748955 | chr11:118016238-118016984 | SCN4B              |
| cg20749741 | chr2:263401-265238        | SH3YL1; ACP1       |
| cg20750832 | chr5:170741604-170742751  |                    |
| cg20761860 | chr5:131991555-131992304  | IL13; TH2LCRR      |
| cg20769177 | chr17:44928288-44929690   | WNT9B              |
| cg20771178 | chr11:8615398-8615889     | STK33              |
| cg20776829 | chr4:90758009-90758870    | SNCA               |
| cg20785796 | chr2:200320503-200329681  | SATB2              |
| cg20787173 | chr6:133562087-133563586  | EYA4               |
| cg20797142 | chr1:6051596-6052955      | NPHP4; KCNAB2      |
| cg20800509 | chr8:104510871-104513913  |                    |
| cg20809087 | chr15:72611947-72612802   | CELF6              |
| cg20810478 | chr1:248020331-248021252  | TRIM58             |
| cg20817902 | chr4:81123509-81124318    | PRDM8              |
| cg20844851 | chr6:117591534-117592279  | VGLL2              |
| cg20859731 | chr20:36226618-36226841   |                    |
| cg20885782 | chr4:41875446-41875794    |                    |
| cg20902783 | chr14:21492736-21494270   | NDRG2              |
| cg20912770 | chr11:2290105-2292932     | ASCL2              |
| cg20923245 | chr12:104697349-104697984 | TXNRD1; EID3       |
| cg20927661 | chr2:5836069-5837643      | SOX11              |
| cg20935165 | chr2:172972805-172973242  | DLX2-DT            |
| cg20944305 | chr3:152552603-152553712  | P2RY1              |
| cg20945085 | chr2:74875129-74875562    | M1AP               |
| cg20950465 | chr1:53067881-53068608    | GPX7               |
| cg20953187 | chr3:45837481-45838256    | SLC6A20            |
| cg20961591 | chr19:38754847-38755699   | SPINT2             |
| cg20971220 | chr19:50554013-50554492   |                    |
| cg20977794 | chr14:51560117-51562487   | TRIM9              |
| cg20978694 | chr4:2059929-2063181      | NAT8L              |
| cg20984053 | chr7:156802171-156804414  | MNX1; MNX1-AS1     |
| cg20985450 | chr13:100620242-100624348 | ZIC5               |
| cg20986370 | chr4:57975861-57976916    | IGFBP7; IGFBP7-AS1 |
| cg21000072 | chr1:3566446-3569636      | TP73; WRAP73       |
| cg21002957 | chr19:15568028-15569227   | RASAL3             |
| cg21006031 | chr19:43967248-43968625   | LYPD3              |
| cg21007414 | chr11:76381450-76382295   | LRRC32             |
| cg21011139 | chr11:7694712-7695685     | CYB5R2             |
| cg21033440 | chr11:65409637-65410127   | SIPA1              |

|            |                           |                     |
|------------|---------------------------|---------------------|
| cg21038156 | chr7:158936508-158938492  | VIPR2               |
| cg21039708 | chr14:57278710-57279116   | OTX2-AS1            |
| cg21046967 | chr17:37761692-37763551   | NEUROD2             |
| cg21051519 | chr5:137224987-137225477  | PKD2L2              |
| cg21052682 | chr11:69517841-69519929   | FGF19               |
| cg21073930 | chr19:12984133-12985466   | MAST1               |
| cg21074827 | chr3:158288801-158289271  | MLF1                |
| cg21079345 | chr7:134143116-134144063  | AKR1B1              |
| cg21101720 | chr17:27939299-27940770   | ANKRD13B            |
| cg21104276 | chr7:90893568-90896683    | FZD1                |
| cg21115608 | chr13:20735044-20736157   | GJA3                |
| cg21144922 | chr1:109203594-109204378  | HENMET1             |
| cg21158087 | chr17:58216297-58216505   |                     |
| cg21158411 | chr9:130689379-130690215  | PIP5KL1             |
| cg21172458 | chr8:86350766-86351196    | CA3                 |
| cg21195185 | chr4:76555367-76556079    | CDKL2               |
| cg21200353 | chr3:183145428-183146790  | MCF2L2              |
| cg21200408 | chr20:21376359-21378245   | NKX2-4              |
| cg21200656 | chr20:21376359-21378245   | NKX2-4              |
| cg21207028 | chr20:327377-328977       | NRSN2               |
| cg21237687 | chr17:6898821-6900427     | ALOX12              |
| cg21248554 | chr2:27664940-27665151    | KRTCAP3             |
| cg21249376 | chr9:27528358-27528725    | MOB3B               |
| cg21265540 | chr12:125534061-125534527 |                     |
| cg21270860 | chr1:38510103-38513642    | POU3F1              |
| cg21277995 | chr6:391189-393790        | IRF4                |
| cg21282549 | chr19:51925000-51925413   |                     |
| cg21290042 | chr1:224803638-224805314  | CNIH3               |
| cg21306240 | chr1:38229839-38230888    | EPHA10              |
| cg21319323 | chr2:177001222-177001783  | HOXD-AS2            |
| cg21325154 | chr4:141489963-141490378  | UCP1                |
| cg21334513 | chr6:30095174-30095610    |                     |
| cg21346043 | chr8:86350766-86351196    | CA3                 |
| cg21347053 | chr6:1624186-1625468      | GMD5                |
| cg21355828 | chr7:149389655-149389976  |                     |
| cg21361094 | chr12:58021295-58022037   | B4GALNT1            |
| cg21383487 | chr10:22623351-22625875   |                     |
| cg21383810 | chr12:65514879-65515863   | WIF1                |
| cg21384402 | chr10:105036629-105038084 | INA                 |
| cg21392341 | chr1:119529820-119530712  | TBX15               |
| cg21404045 | chr7:27231806-27233097    |                     |
| cg21415530 | chr8:140714586-140718259  | KCNK9               |
| cg21424782 | chr20:48598960-48599657   | SNAI1               |
| cg21425842 | chr6:26240698-26240951    | HIST1H4F            |
| cg21433558 | chr17:40837023-40837525   | CNTNAP1             |
| cg21447550 | chr1:223536843-223538628  | SUSD4               |
| cg21453443 | chr1:228645197-228646434  | HIST3H2BB; HIST3H2A |
| cg21463763 | chr20:3713160-3713515     | HSPA12B             |
| cg21472506 | chr2:63283937-63284147    | OTX1                |
| cg21475402 | chr1:156611640-156612447  | BCAN                |

|            |                           |                    |
|------------|---------------------------|--------------------|
| cg21491107 | chr16:85644948-85649027   | GSE1               |
| cg21497607 | chr2:74425445-74426423    | MTHFD2             |
| cg21497990 | chr7:155255099-155255311  | EN2                |
| cg21534423 | chr19:24154458-24154759   |                    |
| cg21535253 | chr19:12758274-12758754   | MAN2B1             |
| cg21538208 | chr4:4864457-4864834      | MSX1               |
| cg21540810 | chr19:53141176-53141813   | ZNF83              |
| cg21554552 | chr3:50377804-50378540    | RASSF1             |
| cg21570988 | chr6:32116591-32117229    | PRRT1              |
| cg21572621 | chr7:28995306-28998541    | TRIL               |
| cg21590264 | chr5:37834672-37835128    | GDNF               |
| cg21609640 | chr1:166889777-166890649  | ILDR2              |
| cg21610164 | chr6:26273291-26273557    | HIST1H2BI; H2BC10  |
| cg21643403 | chr8:104383410-104384109  | CTHRC1             |
| cg21647227 | chr1:119526783-119527192  | TBX15              |
| cg21654383 | chr2:85640970-85641259    | CAPG               |
| cg21658235 | chr8:22456092-22456508    | c8orf58            |
| cg21684012 | chr6:100912072-100913337  | SIM1               |
| cg21692846 | chr11:134145560-134147180 | GLB1L3             |
| cg21706229 | chr17:70112825-70114271   | SOX9               |
| cg21725888 | chr6:43252735-43253476    | TTBK1              |
| cg21743907 | chr7:129422998-129423355  |                    |
| cg21762523 | chr6:108497596-108497996  | NR2E1              |
| cg21773872 | chr7:30721373-30722445    | CRHR2              |
| cg21773962 | chrX:139585868-139588578  | SOX3               |
| cg21790626 | chr19:58220190-58220517   | ZNF154             |
| cg21799346 | chr11:2905024-2907024     | CDKN1C             |
| cg21800232 | chr5:79864843-79866447    | ANKRD34B           |
| cg21801378 | chr15:72611947-72612802   | CELF6              |
| cg21816330 | chr17:27044169-27045049   | RAB34              |
| cg21820656 | chr15:59157046-59157594   |                    |
| cg21836358 | chr1:63782395-63790471    | FOXD3; FOXD3-AS1   |
| cg21848143 | chr1:39269730-39270251    |                    |
| cg21856256 | chr2:121200504-121200788  |                    |
| cg21858380 | chr2:119914127-119916663  | C1QL2              |
| cg21868134 | chr1:45792420-45793301    | HPDL               |
| cg21872037 | chr17:6616423-6617471     | SLC13A5            |
| cg21872764 | chr22:19510872-19512254   | CLDN5              |
| cg21874829 | chr22:38808785-38809017   |                    |
| cg21875532 | chr6:42109905-42110361    | c6orf132           |
| cg21883598 | chr15:45403249-45404218   | DUOX2              |
| cg21884231 | chr3:170303533-170303768  | SLC7A14            |
| cg21884421 | chr15:65647918-65648491   | IGDCC3             |
| cg21889472 | chr5:42992034-42992955    | FLJ32255           |
| cg21901946 | chr7:127744195-127744554  |                    |
| cg21908235 | chr1:146551477-146551764  |                    |
| cg21908638 | chr3:101497831-101498648  | NXPE3              |
| cg21912308 | chrX:48929637-48930361    | PRAF2              |
| cg21921384 | chr4:57975861-57976916    | IGFBP7; IGFBP7-AS1 |
| cg21928701 | chr19:821346-822669       | PLPPR3             |

|            |                           |                      |
|------------|---------------------------|----------------------|
| cg21940568 | chr19:52207133-52207731   | SPACA6               |
| cg21945930 | chr7:96631384-96631800    | DLX6-AS1             |
| cg21951457 | chr10:123922851-123923542 | TACC2                |
| cg21962901 | chr19:18543829-18549161   | ISYNA1               |
| cg22001496 | chr8:69242921-69243803    | c8orf34; c8orf34-as1 |
| cg22010052 | chr5:115298351-115299137  | LVRN                 |
| cg22029275 | chr13:25743999-25746127   | AMER2                |
| cg22053904 | chr6:30227321-30228255    | HLA-L; HCG17         |
| cg22054918 | chr4:81123509-81124318    | PRDM8                |
| cg22059073 | chr22:17600564-17602611   |                      |
| cg22066230 | chr11:66034752-66035054   | RAB1B                |
| cg22070406 | chr18:55019708-55021605   | ST8SIA3              |
| cg22076972 | chr19:6740670-6741203     | TRIP10               |
| cg22078805 | chr17:42431093-42432555   | FAM171A2             |
| cg22079161 | chr4:7940564-7941853      | AFAP1                |
| cg22121557 | chr6:28583935-28584289    | ZBED9                |
| cg22131234 | chr7:54609735-54610140    | VSTM2A               |
| cg22144875 | chr19:46032305-46032855   | OPA3                 |
| cg22149516 | chr5:101632050-101632373  | SLCO4C1              |
| cg22152688 | chr7:97839863-97840222    | BHLHA15              |
| cg22153181 | chr4:172733735-172735118  | GALNTL6              |
| cg22158769 | chr2:39186778-39187968    | ARHGEF33             |
| cg22160000 | chr1:45251963-45252292    | BEST4                |
| cg22167515 | chr1:91190490-91192804    |                      |
| cg22168369 | chr1:85462586-85463435    | MCOLN2               |
| cg22178238 | chr7:158361910-158362970  | PTPRN2               |
| cg22183049 | chr5:139143966-139144177  |                      |
| cg22186831 | chr5:176543901-176544228  |                      |
| cg22191696 | chr17:71948479-71949255   |                      |
| cg22195627 | chr19:12305553-12306304   |                      |
| cg22201588 | chr19:11533199-11533619   | CCDC151              |
| cg22210157 | chr3:46853728-46854138    | PRSS50               |
| cg22212691 | chr2:220416864-220417869  | OBSL1                |
| cg22232327 | chr18:53447075-53447842   | LINC01415            |
| cg22241820 | chr15:68115486-68122575   | SKOR1                |
| cg22274539 | chr12:103696091-103696418 | c12orf42             |
| cg22275864 | chr8:37822487-37824008    | ADRB3                |
| cg22277636 | chr2:218621280-218621498  | DIRC3                |
| cg22282405 | chr6:50810643-50810994    | TFAP2B               |
| cg22282410 | chr7:158379329-158381221  | PTPRN2               |
| cg22305167 | chr6:29521111-29521833    | OR2I1P               |
| cg22311200 | chr17:46695326-46695553   |                      |
| cg22319311 | chr8:98289605-98290404    | TSPYL5               |
| cg22322863 | chr17:30813178-30815239   | CDK5R1               |
| cg22345692 | chr5:32709911-32714450    | NPR3                 |
| cg22346124 | chr11:2290105-2292932     | ASCL2                |
| cg22348673 | chr7:28995306-28998541    | TRIL                 |
| cg22352818 | chr2:97192978-97193383    |                      |
| cg22367989 | chr2:206546604-206547566  | NRP2                 |
| cg22375192 | chr15:99190447-99194559   | IGF1R; IRAIN         |

|            |                          |                     |
|------------|--------------------------|---------------------|
| cg22376688 | chr12:49371691-49375550  | WNT1                |
| cg22399133 | chr2:208988835-208989269 | CRYGD               |
| cg22402852 | chr4:108852496-108853387 | CYP2U1              |
| cg22409276 | chr15:40763163-40764196  | CHST14              |
| cg22410478 | chr6:110678855-110679108 | METLL24             |
| cg22418737 | chr7:139930066-139930356 |                     |
| cg22433276 | chr1:1072370-1072847     | LINC01342           |
| cg22443762 | chr1:197890479-197890824 | LHX9                |
| cg22447539 | chr7:5632336-5634555     | FSCN1               |
| cg22455914 | chr18:7116853-7118241    | LAMA1               |
| cg22465516 | chr17:54910497-54912470  | DGKE; c17orf67      |
| cg22468075 | chr20:22548968-22549720  | LINC00261           |
| cg22471255 | chr22:42315503-42316409  |                     |
| cg22488797 | chr5:134363093-134365146 | PITX1               |
| cg22490134 | chr10:22623351-22625875  |                     |
| cg22510337 | chr19:58399946-58400276  | ZNF814              |
| cg22524657 | chr1:47998900-47999517   |                     |
| cg22531183 | chr19:50554013-50554492  | ZNF473              |
| cg22535307 | chr15:48936811-48938577  | FBN1                |
| cg22536150 | chr3:142837886-142840838 | CHST2               |
| cg22539420 | chr2:200320503-200329681 | SATB2               |
| cg22546696 | chr15:41952536-41953222  | MGA                 |
| cg22557662 | chr19:38746639-38747379  | PPP1R14A            |
| cg22560214 | chr4:13530848-13531244   | LINC01097           |
| cg22569587 | chrX:9733155-9734064     | GPR143              |
| cg22571038 | chr17:48585386-48586167  | MYCBPAP             |
| cg22571664 | chr5:32709911-32714450   | NPR3                |
| cg22579265 | chr10:94180316-94180754  | MARK2P9             |
| cg22592142 | chr15:45408574-45409528  | DUOXA2              |
| cg22598028 | chr3:44626326-44626794   | ZNF660; ZNF660-197  |
| cg22604123 | chr1:32930501-32931061   | ZBTB8B              |
| cg22605919 | chr17:42733487-42734626  | MEIOC               |
| cg22606658 | chr4:150999251-151000706 | DCLK2               |
| cg22617773 | chr6:29521111-29521833   | OR2I1P              |
| cg22645427 | chr20:25128765-25129610  |                     |
| cg22659676 | chr5:139525538-139526227 |                     |
| cg22660578 | chr17:35291900-35300875  | LHX1; LHX1-DT       |
| cg22674699 | chr2:176986425-176988291 | HOXD9               |
| cg22682811 | chr20:21372042-21372463  |                     |
| cg22690188 | chrX:64626744-64628045   |                     |
| cg22694470 | chr1:92495368-92495964   | EPHX4               |
| cg22720790 | chr19:58715221-58716033  | ZNF274              |
| cg22721334 | chr19:58609339-58609988  | ZSCAN18             |
| cg22730047 | chr1:161410143-161442503 |                     |
| cg22730464 | chr5:94955631-94957244   | GPR150              |
| cg22740547 | chr11:13030331-13032584  | RASSF10; RASSF10-DT |
| cg22758454 | chr17:16569939-16570517  |                     |
| cg22762844 | chr2:95690858-95692431   | MAL                 |
| cg22789900 | chr1:226411008-226411880 | MIXL1               |
| cg22791936 | chr6:137242316-137245442 | SLC35D3             |

|            |                           |                              |
|------------|---------------------------|------------------------------|
| cg22792646 | chr11:15136059-15136545   | INSC                         |
| cg22802813 | chr12:95941907-95942979   | USP44                        |
| cg22807877 | chr8:141107838-141110984  | PEG13                        |
| cg22815953 | chr20:48598960-48599657   | SNAI1                        |
| cg22827250 | chr5:134363093-134365146  | PITX1                        |
| cg22836229 | chr8:49647703-49647988    | EFCAB1                       |
| cg22848598 | chr8:38965014-38965423    | ADAM32                       |
| cg22855900 | chr5:72529100-72529976    |                              |
| cg22856324 | chr2:72371122-72375004    | CYP26B1                      |
| cg22865058 | chr11:2905024-2907024     | CDKN1C                       |
| cg22871653 | chr1:119535667-119535987  |                              |
| cg22871668 | chr6:133562087-133563586  | EYA4                         |
| cg22876812 | chr2:71115928-71116412    | LINC01143                    |
| cg22878622 | chr8:67873389-67875600    | TCF24                        |
| cg22880677 | chr8:1771362-1772760      | ARHGEF10                     |
| cg22881914 | chr14:52534582-52536722   | NID2                         |
| cg22882665 | chr2:45240373-45241579    |                              |
| cg22884130 | chr22:32026298-32026874   | PISD                         |
| cg22892110 | chr8:144798488-144799038  | MAPK15                       |
| cg22900415 | chr13:20735044-20736157   | GJA3                         |
| cg22902177 | chr3:129323916-129325332  | PLXND1                       |
| cg22905274 | chr4:154170369-154170600  | TRIM2                        |
| cg22953960 | chr10:22764709-22767050   |                              |
| cg22958090 | chr12:52626794-52627577   | KRT7                         |
| cg22963915 | chr19:3785512-3786653     | MATK                         |
| cg22977876 | chr2:172949243-172950126  | DLX1                         |
| cg22979783 | chr2:72371122-72375004    | CYP26B1                      |
| cg22983083 | chr19:8656789-8657917     | ADAMTS10                     |
| cg22984571 | chr3:186490603-186490813  |                              |
| cg23003534 | chr10:105036629-105038084 | INA                          |
| cg23016129 | chr10:22634001-22634862   | SPAG6                        |
| cg23026864 | chr5:140305713-140307193  | HA1,2,3,4,5,6,7,8,9,10,11,12 |
| cg23027521 | chr1:247170869-247171434  | ZNF625; ZNF625-ZNF20         |
| cg23029526 | chr1:21616381-21617101    | ECE1                         |
| cg23030278 | chr15:55879793-55881228   | PYGO1                        |
| cg23039195 | chr10:22623351-22625875   |                              |
| cg23043245 | chr6:34433412-34434371    | PACSIN1                      |
| cg23049458 | chr1:62660556-62660946    | L1TD1                        |
| cg23052826 | chr2:232478360-232479925  |                              |
| cg23054189 | chr1:248020331-248021252  | TRIM58                       |
| cg23058177 | chr2:10219803-10221016    | CYS1                         |
| cg23064609 | chr2:175208416-175209076  |                              |
| cg23068913 | chr10:23462225-23463889   |                              |
| cg23089825 | chr1:170630457-170630851  |                              |
| cg23091758 | chr11:9025096-9026315     | NRIP3                        |
| cg23092040 | chr14:65068369-65068668   |                              |
| cg23095743 | chr10:104000255-104001741 | PITX3                        |
| cg23097402 | chr1:50882998-50883426    | DMRTA2                       |
| cg23118086 | chr15:65360025-65360542   | RASL12                       |
| cg23119604 | chr6:30227321-30228255    | HCG17; HLA-L                 |

|            |                          |                             |
|------------|--------------------------|-----------------------------|
| cg23125200 | chr13:20806017-20806867  | GJB6                        |
| cg23132624 | chr13:33589929-33591428  | KL                          |
| cg23136139 | chr10:43697778-43698177  | RASGEF1A                    |
| cg23148701 | chr12:64061837-64062774  | DPY19L2                     |
| cg23152743 | chr7:139167481-139168712 | KLRG2                       |
| cg23154526 | chr15:60296136-60298520  | FOXB1                       |
| cg23187653 | chr5:95768875-95769080   | PCSK1                       |
| cg23194354 | chr7:3340355-3341216     | SDK1                        |
| cg23200020 | chr19:35068407-35068897  | SCGB1B2P                    |
| cg23208152 | chr3:50382890-50383310   | ZMYND10                     |
| cg23208513 | chr8:101117923-101118693 | RGS22                       |
| cg23217622 | chr1:156405161-156406350 |                             |
| cg23229261 | chr2:63283937-63284147   | OTX1                        |
| cg23231910 | chr2:202897387-202901046 | FZD7                        |
| cg23237183 | chr2:73429284-73430647   | NOTO                        |
| cg23244289 | chr5:79330929-79331488   | THBS4                       |
| cg23244790 | chr5:140810495-140812617 | 4,5,6,7,8,9,10,11,12; PCDHG |
| cg23246885 | chr2:202897387-202901046 | FZD7                        |
| cg23248887 | chr14:38678246-38680937  | SSTR1                       |
| cg23255835 | chr2:29337984-29338909   | CLIP4                       |
| cg23258881 | chr1:150121696-150123078 | PLEKH01                     |
| cg23265500 | chr14:65016517-65016909  | PPP1R36                     |
| cg23266594 | chr5:149546028-149546988 | CDX1                        |
| cg23267759 | chr18:19744937-19752363  | GATA6; GATA6-AS1            |
| cg23290344 | chr8:24770909-24772547   | NEFM                        |
| cg23297477 | chr16:66638255-66639561  | CMTM3                       |
| cg23302649 | chr14:29243404-29243763  | LINC01551                   |
| cg23305408 | chr1:32169538-32169869   | COL16A1                     |
| cg23305567 | chr19:54369388-54369809  | MYADM                       |
| cg23310835 | chr19:24154458-24154759  |                             |
| cg23316253 | chr10:8076003-8077261    |                             |
| cg23318063 | chr14:58331677-58333121  | SLC35F4                     |
| cg23319982 | chr19:41641308-41642082  |                             |
| cg23322933 | chr14:61108955-61109786  | SALRNA1                     |
| cg23325963 | chr2:45159894-45160112   |                             |
| cg23337116 | chr4:53728038-53729000   | RASL11B                     |
| cg23353952 | chr22:29875920-29877242  | NEFH                        |
| cg23356769 | chrX:129243675-129245575 | ELF4                        |
| cg23376821 | chr6:45389421-45391646   | RUNX2                       |
| cg23402821 | chr17:35291900-35300875  | LHX1; LHX1-DT               |
| cg23413104 | chr2:118981770-118982466 |                             |
| cg23426238 | chr7:103086345-103086840 | SLC26A5                     |
| cg23428985 | chr2:29337984-29338909   | CLIP4                       |
| cg23445461 | chr5:140864528-140864748 | 7,8,9,10,11,12; PCDHGB1,2,3 |
| cg23461615 | chr7:103085711-103086132 | SLC26A5                     |
| cg23462514 | chr4:1107126-1107728     | RNF212                      |
| cg23463269 | chr11:15136059-15136545  | INSC                        |
| cg23479922 | chr5:16179065-16180420   | MARCH11                     |
| cg23495748 | chr5:175223610-175224679 | CPLX2                       |
| cg23497383 | chr2:239140097-239140659 |                             |



|            |                           |                              |
|------------|---------------------------|------------------------------|
| cg23501406 | chr11:636907-640628       | DRD4                         |
| cg23505145 | chr19:12996087-12997039   | KLF1                         |
| cg23511432 | chr5:137610106-137610311  | GFRA3                        |
| cg23511613 | chr2:88751336-88752865    | FOXI3                        |
| cg23516463 | chr10:88391747-88392242   |                              |
| cg23524735 | chr2:209271338-209271987  | PTH2R                        |
| cg23528400 | chr3:32858195-32860506    | TRIM71                       |
| cg23543123 | chr4:48485363-48486473    | SLC10A4                      |
| cg23543615 | chr19:19280999-19281560   | MEF2B                        |
| cg23563234 | chr5:140797163-140797701  | 2,3,4,5,6,7,8,9,10; PCDHGB1, |
| cg23565942 | chr10:21462129-21463808   | NEBL; NEBL-AS1               |
| cg23572908 | chr7:158936508-158938492  | VIPR2                        |
| cg23588217 | chr1:119529820-119530712  | TBX15                        |
| cg23597629 | chr1:229567207-229570684  | ACTA1                        |
| cg23610453 | chr10:79470963-79471425   |                              |
| cg23619365 | chr13:112709885-112712665 | SOX1-OT                      |
| cg23620340 | chr1:63782395-63790471    | FOXD3; FOXD3-AS1             |
| cg23624808 | chr18:32847285-32848130   | ZSCAN30                      |
| cg23625660 | chr5:135265849-135266517  | FBXL21                       |
| cg23634087 | chr20:50721311-50721912   | ZFP64                        |
| cg23652859 | chr19:59092692-59093273   | CENPBDEP1                    |
| cg23663760 | chr1:228246632-228247197  | WNT3A                        |
| cg23666378 | chr1:3662964-3664085      | TP73-AS1                     |
| cg23681664 | chr3:9745500-9746782      | CPNE9                        |
| cg23684074 | chr7:128470444-128471161  | FLNC                         |
| cg23695133 | chr20:21086140-21087175   |                              |
| cg23697855 | chr7:89950259-89950778    | FAM237B                      |
| cg23719069 | chr15:83875649-83877079   | HDGFL3                       |
| cg23728669 | chr11:63258379-63258804   | HRASLS5                      |
| cg23735712 | chr4:40858885-40859162    | APBB2                        |
| cg23746497 | chr6:105388191-105389545  | LIN28B                       |
| cg23754431 | chr11:69258150-69258544   |                              |
| cg23763647 | chr10:4868126-4868949     | AKR1E2                       |
| cg23778596 | chr7:149410859-149412351  | KRBA1                        |
| cg23782001 | chr7:138720045-138721019  | ZC3HAV1L                     |
| cg23808946 | chr2:45169506-45171884    | SIX3                         |
| cg23816347 | chr3:126113548-126113967  | CCDC37-DT; CFAP100           |
| cg23817096 | chr6:1619094-1621094      |                              |
| cg23837799 | chr15:31683985-31685824   |                              |
| cg23842255 | chr22:29875920-29877242   | NEFH                         |
| cg23844174 | chr1:2064629-2064855      | PRKCZ                        |
| cg23847109 | chr1:40782221-40783145    | COL9A2                       |
| cg23847712 | chr4:9783036-9784960      | DRD5                         |
| cg23858040 | chr10:11059443-11060524   | CELF2                        |
| cg23874437 | chr19:38886110-38886615   | SPRED3                       |
| cg23874561 | chr4:81124469-81124845    | PRDM8                        |
| cg23881278 | chr11:113345069-113346328 | DRD2                         |
| cg23882862 | chr11:111169305-111170428 |                              |
| cg23900203 | chr12:127765277-127765515 |                              |
| cg23901852 | chr4:126235896-126238930  | FAT4                         |

|            |                           |                    |
|------------|---------------------------|--------------------|
| cg23906738 | chr14:36986363-36990576   | NKX2-1; NKX2-1-AS1 |
| cg23907926 | chr12:131303094-131303836 | STX2               |
| cg23912429 | chr10:17270431-17272617   | VIM; VIM-AS1       |
| cg23920953 | chr14:70038109-70040302   | CCDC177            |
| cg23923856 | chr1:113050814-113052301  | WNT2B              |
| cg23944005 | chr6:26271346-26271588    | HIST1H3G           |
| cg23944251 | chr10:25463757-25465639   | GPR158; GPR158-AS1 |
| cg23951961 | chr4:42152767-42154984    | BEND4              |
| cg23964682 | chr2:241496577-241497600  | ANKMY1             |
| cg23965061 | chr8:22960385-22960927    | TNFRSF10C          |
| cg23971915 | chr3:46742765-46743086    | TMIE               |
| cg23973429 | chr8:102504479-102504841  | GRHL2              |
| cg23989963 | chr15:83951981-83953930   | BNC1               |
| cg23994043 | chr2:200320503-200329681  | SATB2              |
| cg23999695 | chr15:89942593-89943853   |                    |
| cg23999932 | chr4:54975388-54976202    |                    |
| cg24002887 | chr7:64407590-64408299    |                    |
| cg24013620 | chr8:144798488-144799038  | MAPK15             |
| cg24015249 | chr9:124498514-124498962  | DAB2IP             |
| cg24026757 | chr18:12407716-12408242   | SLMO1              |
| cg24031355 | chr10:22634001-22634862   | SPAG6              |
| cg24034005 | chr14:97058944-97059522   |                    |
| cg24035245 | chr1:119535667-119535987  |                    |
| cg24037897 | chr10:16561605-16563822   | C1QL3              |
| cg24039697 | chr10:8091375-8098329     | GATA3; GATA3-AS1   |
| cg24051554 | chr1:151810461-151811684  | C2CD4D             |
| cg24073122 | chr1:3566446-3569636      | TP73; WARP73       |
| cg24078363 | chr14:77227570-77228691   | VASH1              |
| cg24084504 | chr4:42399153-42400802    | SHISA3             |
| cg24087403 | chr10:71077947-71079377   | HK1                |
| cg24098326 | chr10:123922851-123923542 | TACC2              |
| cg24102266 | chr1:33219428-33220028    | KIAA1522           |
| cg24104938 | chr6:108485672-108490539  | NR2E1              |
| cg24106636 | chr1:116380360-116382364  | NHLH2              |
| cg24125828 | chr6:32116591-32117229    | PRRT1              |
| cg24127874 | chr2:239147593-239149900  | HES6               |
| cg24144440 | chr1:119526783-119527192  | TBX15              |
| cg24154839 | chr4:46995129-46995872    | GABRA4             |
| cg24157892 | chr17:59473061-59483266   | TBX2               |
| cg24159214 | chr3:50402104-50402942    | CACNA2D2           |
| cg24161925 | chr6:139116947-139117469  | ECT2L              |
| cg24166864 | chr12:65514879-65515863   | WIF1               |
| cg24190603 | chr6:84417598-84419378    | SNAP91             |
| cg24198558 | chr3:132756986-132757895  | TEMEM108           |
| cg24199834 | chr4:147559206-147561901  | POU4F2             |
| cg24213719 | chr18:60263381-60264248   |                    |
| cg24217704 | chr2:166649910-166650966  | GALNT3             |
| cg24217844 | chr6:137242316-137245442  | SLC35D3            |
| cg24225517 | chr6:108485672-108490539  | NR2E1              |
| cg24239148 | chr10:63422539-63423105   | caboco1            |

|            |                           |                      |
|------------|---------------------------|----------------------|
| cg24255928 | chr10:97802872-97804262   | CCNJ                 |
| cg24274579 | chr17:59531724-59535254   | TBX4                 |
| cg24276681 | chr18:2905951-2907348     | EMILIN2              |
| cg24292235 | chr12:8171337-8171790     |                      |
| cg24300924 | chr18:12407716-12408242   | SLMO1                |
| cg24306982 | chr1:119549145-119551320  |                      |
| cg24318763 | chr7:139208443-139209069  | CLEC2L               |
| cg24319718 | chr2:206546604-206547566  | NRP2                 |
| cg24331301 | chr10:73156165-73157954   | CDH23                |
| cg24347663 | chr2:70994448-70995385    | ADD2                 |
| cg24358846 | chr8:99984585-99985072    |                      |
| cg24368902 | chr10:43248524-43250912   |                      |
| cg24370475 | chr11:69517841-69519929   | FGF19                |
| cg24382527 | chr10:135089970-135090491 | ADAM8                |
| cg24385580 | chr17:28088028-28088607   | SSH2                 |
| cg24393316 | chr9:100615235-100617510  | FOXE1                |
| cg24399349 | chr7:55516872-55517249    |                      |
| cg24399712 | chr22:39784355-39785104   |                      |
| cg24405179 | chr1:226411008-226411880  | MIXL1                |
| cg24412501 | chr11:13689589-13690724   | FAR1; FAR1-IT1       |
| cg24416513 | chr2:176993480-176995557  | HOXD8                |
| cg24425838 | chr1:151812254-151812525  | C2CD4D               |
| cg24432073 | chr4:76555367-76556079    | CDKL2                |
| cg24437737 | chr1:149399899-149400518  |                      |
| cg24442454 | chr6:37616723-37617179    | MDGA1                |
| cg24446586 | chr7:27225051-27225629    | HOXA11               |
| cg24448269 | chr17:54910497-54912470   | DGKE; c17orf67       |
| cg24453580 | chr12:49688874-49691360   | PRPH; AC125611.4     |
| cg24468070 | chr19:54974176-54976819   | LENG9; CDC42EP5      |
| cg24469980 | chr1:221064890-221065600  |                      |
| cg24471254 | chr7:100253783-100254150  | ACTL6B               |
| cg24496475 | chr4:1396292-1401730      | NKX1-1               |
| cg24505618 | chr15:45421237-45422394   | DUOXA1; DUOX1        |
| cg24524285 | chr11:64405452-64406006   | NRXN2                |
| cg24525176 | chr1:47909713-47911020    |                      |
| cg24525457 | chr7:100091181-100091598  | NYAP1                |
| cg24542751 | chr17:43339125-43339832   | SPATA32; MAP3K14-AS1 |
| cg24575083 | chr11:7694712-7695685     | CYB5R2               |
| cg24588482 | chr1:160370113-160370658  | VANGL2               |
| cg24589459 | chr2:198649752-198651599  | BOLL                 |
| cg24590788 | chr13:95655109-95655517   |                      |
| cg24599205 | chr1:110752257-110754794  | KCNC4                |
| cg24599249 | chr7:90893568-90896683    | FZD1                 |
| cg24604013 | chr13:112720565-112723582 | SOX1                 |
| cg24610236 | chr7:30721373-30722445    | CRHR2                |
| cg24626079 | chr12:4378367-4382222     | CCND2; CCND2-AS1     |
| cg24626554 | chr7:5111621-5112088      | RBAKDN; RBAK-RBAKDN  |
| cg24634568 | chr1:43250763-43251082    | TMEM269              |
| cg24654525 | chr12:58004983-58005351   | ARHGEF25             |
| cg24657817 | chr4:42152767-42154984    | BEND4                |

|            |                           |                          |
|------------|---------------------------|--------------------------|
| cg24659054 | chr10:134597358-134602649 | NKX6-2                   |
| cg24662718 | chr1:108507252-108507841  | VAV3; VAV3-AS1           |
| cg24674635 | chr20:6750696-6750957     | BMP2                     |
| cg24683414 | chr1:92945908-92952609    | GFI1                     |
| cg24685006 | chr1:36042433-36043444    | TFAP2E                   |
| cg24710320 | chr3:192958710-192959373  | HRASLS                   |
| cg24714905 | chr13:100637113-100637472 | ZIC2                     |
| cg24718866 | chr2:25391073-25391875    | POMC                     |
| cg24718971 | chr5:80255905-80257006    | RASGRF2; RASGRF2-AS1     |
| cg24722112 | chr3:49755764-49757317    | AMIGO3; GMPPB; RNF123    |
| cg24724633 | chr19:36909282-36909854   | ZFP82                    |
| cg24724664 | chr2:172944989-172945384  | METAP1D                  |
| cg24740531 | chr18:60985504-60985741   | BCL2                     |
| cg24745495 | chr19:15344092-15344419   | EPHX3                    |
| cg24746100 | chr2:88751336-88752865    | FOXI3                    |
| cg24770624 | chr2:20068429-20068907    | LINC00954                |
| cg24785067 | chr18:19928417-19929329   |                          |
| cg24794228 | chr19:52390842-52391368   | ZNF577; ZNF649-AS1       |
| cg24800655 | chr12:133065844-133066393 | FBRSL1                   |
| cg24804544 | chr7:6543796-6544108      | GRID2IP                  |
| cg24808280 | chr1:169396622-169396869  | CCDC181                  |
| cg24809973 | chr8:72468561-72469561    |                          |
| cg24812837 | chr10:102893661-102895059 | TLX1                     |
| cg24816460 | chr6:4775132-4777550      | CDYL                     |
| cg24817154 | chr6:27858167-27858564    | HIST1H3J                 |
| cg24818939 | chrX:101906002-101907017  | ARMCX5-GPRASP2; GPRASP1  |
| cg24831305 | chr19:53426079-53426389   |                          |
| cg24848035 | chr8:101117923-101118693  | RGS22                    |
| cg24851854 | chr1:59042014-59043295    | TACSTD2                  |
| cg24853724 | chr7:28995306-28998541    | TRIL                     |
| cg24856258 | chr15:41952536-41953222   | MGA                      |
| cg24876960 | chr5:1881925-1887743      | IRX4; CTD2194D22.4       |
| cg24879782 | chr2:19560964-19561650    |                          |
| cg24880701 | chr15:68115486-68122575   | SKOR1                    |
| cg24884142 | chr1:119531992-119532196  | TBX15                    |
| cg24884703 | chr1:91185157-91185577    |                          |
| cg24886257 | chr19:52452317-52452543   |                          |
| cg24886267 | chr5:167956220-167957371  | FBLL1                    |
| cg24908814 | chr5:132946745-132948467  | FSTL4                    |
| cg24909548 | chr19:36736022-36736884   | ZNF565                   |
| cg24927800 | chr2:220283201-220283750  | DES                      |
| cg24929737 | chr13:107186469-107189024 | EFNB2                    |
| cg24932457 | chr1:175568377-175568808  | TNR                      |
| cg24934063 | chr7:121943868-121944538  | FEZF1; FEZF1-AS1         |
| cg24937747 | chr5:1881925-1887743      | IRX4                     |
| cg24940138 | chr17:41363728-41364273   | TMEM106A                 |
| cg24947764 | chr4:41881178-41881418    |                          |
| cg24948962 | chr18:2905951-2907348     | EMILIN2                  |
| cg24954895 | chr5:140800761-140801072  | A 1-10; PCDHGA11; PCDHGA |
| cg24960947 | chr11:65816405-65816665   | GAL3ST3                  |

|            |                           |                   |
|------------|---------------------------|-------------------|
| cg24975222 | chr3:45187027-45187946    | CDCP1             |
| cg24979233 | chr4:1800145-1800351      | FGFR3             |
| cg24989962 | chr14:52734208-52735486   | PTGDR             |
| cg24998096 | chr5:115912002-115912384  | SEMA6A; SEMA6-AS2 |
| cg25001102 | chr1:221068783-221069159  |                   |
| cg25027788 | chr12:6166874-6167258     | VWF               |
| cg25032595 | chr13:96204692-96205496   | CLDN10            |
| cg25036779 | chr6:1604607-1615866      | FOXC1             |
| cg25047056 | chr10:30347600-30348416   | JCAD              |
| cg25057743 | chr2:209271338-209271987  | PTH2R             |
| cg25062137 | chr19:10589682-10590041   |                   |
| cg25078444 | chr14:29234890-29235908   | FOXG1             |
| cg25084878 | chr5:127872564-127874945  | FBN2              |
| cg25087487 | chr14:100625320-100626461 | DEGS2             |
| cg25088758 | chr4:110222971-110224257  | COL25A1           |
| cg25109009 | chr16:69760294-69760506   | NQO1              |
| cg25136495 | chr12:6729249-6730310     | LPAR5             |
| cg25137711 | chr1:48058794-48059230    |                   |
| cg25147376 | chr1:166889777-166890649  | ILDR2             |
| cg25152631 | chr3:140660335-140661602  | SLC25A36          |
| cg25153755 | chrX:47433415-47434124    | SYN1              |
| cg25174438 | chr4:85403831-85404524    |                   |
| cg25181651 | chr2:1746834-1748971      | PXDN              |
| cg25181941 | chr17:40805675-40805957   |                   |
| cg25188395 | chr7:27203916-27206462    | HOXA9             |
| cg25189564 | chr7:158936508-158938492  | VIPR2             |
| cg25191628 | chr1:50884229-50891471    | DMRTA2            |
| cg25209842 | chr10:103535637-103536505 | FGF8              |
| cg25214789 | chr5:7849946-7850439      | c5orf49           |
| cg25235766 | chr19:54485304-54486322   | CACNG8            |
| cg25243455 | chr2:114033360-114033617  | PAX8; PAX8-AS1    |
| cg25253217 | chr19:47776371-47778740   | CCDC9; INAFM1     |
| cg25266629 | chr10:102893661-102895059 | TLX1              |
| cg25287474 | chr9:14693031-14693576    | ZDHHC21           |
| cg25295727 | chr17:19483306-19483687   |                   |
| cg25298725 | chr6:30227321-30228255    | HCG17             |
| cg25307318 | chr10:123922851-123923542 | TACC2             |
| cg25307665 | chr7:27182614-27185562    | HOXA5; HOXA6      |
| cg25315816 | chr12:96252021-96252246   | SNRPF             |
| cg25316339 | chr5:79864843-79866447    | ANKRD34B          |
| cg25324047 | chr10:22764709-22767050   |                   |
| cg25324105 | chr19:38182794-38183327   | ZNF781            |
| cg25330243 | chr8:102504479-102504841  | GRHL2             |
| cg25330843 | chr8:49293202-49293547    |                   |
| cg25331703 | chr15:101458287-101460223 | LRRK1             |
| cg25334393 | chr8:145955640-145955989  | ZNF251            |
| cg25334575 | chr13:100641335-100642188 |                   |
| cg25335544 | chr3:49906738-49907482    | CAMKV             |
| cg25340966 | chr1:119531992-119532196  | TBX15             |
| cg25344734 | chr11:13030331-13032584   | RASSF10           |

|            |                           |                            |
|------------|---------------------------|----------------------------|
| cg25351606 | chr6:100917206-100917523  |                            |
| cg25363931 | chr22:42896637-42897041   | SERHL                      |
| cg25365934 | chr10:77155129-77169600   | ZNF503; ZNF503-AS2         |
| cg25375340 | chr1:85462586-85463435    | MCOLN2                     |
| cg25392692 | chr12:58021295-58022037   | B4GALNT1                   |
| cg25397945 | chr19:37095681-37096589   | ZNF529, ZNF529-AS1; ZNF382 |
| cg25416153 | chr18:43355319-43355698   |                            |
| cg25424856 | chrX:50556225-50557179    | SHROOM4                    |
| cg25466090 | chr1:2064629-2064855      | PRKCZ                      |
| cg25482900 | chr5:167956220-167957371  | FBLL1                      |
| cg25485875 | chr10:134597358-134602649 | NKX6-2                     |
| cg25486143 | chr3:50377804-50378540    | RASSF1                     |
| cg25503903 | chr3:138679245-138679579  |                            |
| cg25508679 | chr6:28956107-28956578    |                            |
| cg25513173 | chr15:83875649-83877079   | HDGFL3                     |
| cg25524962 | chr13:20735044-20736157   | GJA3                       |
| cg25527090 | chr10:118893528-118894432 | VAX1                       |
| cg25528916 | chr19:4328659-4328865     | STAP2                      |
| cg25537993 | chr19:58545116-58545897   | ZSCAN1                     |
| cg25552435 | chr5:178016559-178017670  | COL23A1                    |
| cg25577023 | chr14:103394398-103397070 | AMN                        |
| cg25585712 | chr4:41869175-41869459    |                            |
| cg25611476 | chr5:88179867-88180258    | MEF2C; MEFC2-AS1           |
| cg25622366 | chr2:63281035-63281347    | OTX1                       |
| cg25623934 | chr2:12856626-12859019    | TRIB2                      |
| cg25627226 | chr18:4453970-4455647     | DLGAP1                     |
| cg25640635 | chrX:100740222-100740601  |                            |
| cg25644556 | chr7:27208872-27209616    | HOXA10-AS                  |
| cg25645687 | chr3:138663719-138666346  | FOXL2; FOXL2NB; LINC01391  |
| cg25649641 | chr15:76632263-76635515   | ISL2                       |
| cg25657713 | chr6:100038656-100039477  |                            |
| cg25670330 | chr3:138663719-138666346  | FOXL2; FOXL2NB; LINC01391  |
| cg25681339 | chr17:1173536-1174733     | BHLHA9                     |
| cg25693302 | chr18:55862654-55862873   | NEDD4L                     |
| cg25694349 | chr12:133065844-133066393 | FBRSL1                     |
| cg25714826 | chr16:85783863-85785131   | C16orf74                   |
| cg25720804 | chr5:170735170-170739863  | TLX3                       |
| cg25723050 | chr1:224803638-224805314  | CNIH3                      |
| cg25737323 | chr2:29337984-29338909    | CLIP4                      |
| cg25741023 | chr10:102891011-102891794 | TLX1                       |
| cg25742246 | chr1:214153215-214153668  |                            |
| cg25756406 | chr10:134597358-134602649 | NKX6-2                     |
| cg25756435 | chr19:12952016-12952281   | MAST1                      |
| cg25756780 | chr2:121344551-121345341  |                            |
| cg25757598 | chr8:85096760-85097247    | RALYL                      |
| cg25763393 | chr19:52956657-52957245   | ZNF578                     |
| cg25764899 | chr1:47696505-47698197    | TAL1                       |
| cg25771271 | chr1:119549145-119551320  |                            |
| cg25773262 | chr1:156616554-156616946  | BCAN                       |
| cg25784220 | chr19:58609339-58609988   | ZSCAN18                    |

|            |                           |                       |
|------------|---------------------------|-----------------------|
| cg25792518 | chr17:48545571-48546900   | ACSF2; CHAD           |
| cg25794766 | chr1:247170869-247171434  | ZNF695; ZNF670-ZNF695 |
| cg25810938 | chr2:241496577-241497600  | ANKMY1                |
| cg25823419 | chr3:179168736-179169593  | GNB4                  |
| cg25830696 | chr17:42030174-42030941   | PYY                   |
| cg25848557 | chr1:108507252-108507841  | VAV3; VAV3-AS1        |
| cg25862444 | chr1:147737016-147737303  | NBPF8                 |
| cg25862644 | chr10:77155129-77169600   | ZNF503; ZNF503-AS2    |
| cg25875213 | chr19:38182794-38183327   | ZNG781                |
| cg25876509 | chr7:97501184-97501919    | ASNS                  |
| cg25881804 | chr20:21080930-21082824   |                       |
| cg25884711 | chr7:24323559-24325080    | NPY                   |
| cg25886284 | chr19:36909282-36909854   | ZFP82                 |
| cg25887069 | chr22:38220590-38221619   | GALR3                 |
| cg25900280 | chr17:59531724-59535254   | TBX4                  |
| cg25902187 | chr15:55879793-55881228   | PYGO1                 |
| cg25902889 | chr19:4304543-4305122     | FSD1                  |
| cg25920406 | chr10:35928502-35931893   | FZD8                  |
| cg25942450 | chr5:170735170-170739863  | TLX3                  |
| cg25945732 | chr2:263401-265238        | SH3YL1; ACP1          |
| cg25947878 | chr2:20068429-20068907    | LINC00954             |
| cg25951981 | chr4:46995129-46995872    | GABRA4                |
| cg25963041 | chr19:57049676-57050646   | ZFP28; AC005498.2     |
| cg25964032 | chr10:35928502-35931893   | FZD8                  |
| cg25970832 | chr18:28621490-28623117   | DSC3                  |
| cg26005578 | chr11:13030331-13032584   | RASSF10               |
| cg26009486 | chr14:24837873-24838324   | NFATC4                |
| cg26013553 | chr1:111216245-111217937  | KCNA3                 |
| cg26015401 | chr19:49436696-49437055   | DHDH                  |
| cg26029345 | chr8:22960385-22960927    | TNFRSF10C             |
| cg26043257 | chr4:15779999-15780729    | CD38                  |
| cg26047066 | chr1:221068783-221069159  |                       |
| cg26057751 | chr2:87015975-87018182    | CD8A                  |
| cg26064774 | chr4:6665672-6666089      |                       |
| cg26071526 | chr10:123922851-123923542 | TACC2                 |
| cg26074603 | chr12:75602992-75603344   | KCNC2                 |
| cg26090107 | chr11:60718429-60718888   | SLC15A3               |
| cg26103587 | chr6:1619094-1621094      |                       |
| cg26107850 | chr1:228645197-228646434  | HIST3H2A; HIST3H2BB   |
| cg26107890 | chr3:124860570-124861019  | SLC12A8               |
| cg26113809 | chr12:54132149-54132353   |                       |
| cg26114043 | chr4:128544032-128544903  |                       |
| cg26117023 | chr2:74781495-74782685    | DOK1; LOXL3           |
| cg26121591 | chr5:175298516-175300066  | CPLX2                 |
| cg26124318 | chr8:38965014-38965423    | ADAM32                |
| cg26128383 | chr6:31238853-31240120    | HLA-B; HLA-C          |
| cg26130488 | chr17:59528980-59530266   | TBX4                  |
| cg26132320 | chr20:44640289-44641210   | MMP9                  |
| cg26142965 | chr6:29521111-29521833    | OR2I1P                |
| cg26146617 | chr2:232260101-232261134  | B3GNT7                |

|            |                           |                  |
|------------|---------------------------|------------------|
| cg26149244 | chr17:80329067-80330208   | UTS2R            |
| cg26156256 | chr1:116370811-116371303  |                  |
| cg26157385 | chr1:248020331-248021252  | TRIM58           |
| cg26164269 | chr14:62217726-62218077   |                  |
| cg26173997 | chr4:76555367-76556079    | CDKL2            |
| cg26195583 | chr4:41869175-41869459    |                  |
| cg26199241 | chr17:59528980-59530266   | TBX4             |
| cg26211360 | chr12:122667649-122668038 | LRRC43           |
| cg26240185 | chr11:13689589-13690724   | FAR1             |
| cg26245531 | chr14:88459119-88459689   | GALC             |
| cg26246928 | chr1:153650831-153652375  | NPR1             |
| cg26248173 | chr1:166853254-166853790  |                  |
| cg26253438 | chr1:203598472-203598853  | ATP2B4           |
| cg26256263 | chr1:25255528-25259005    | RUNX3            |
| cg26259171 | chr19:49255779-49256495   | FUT1             |
| cg26259537 | chr7:27208872-27209616    | HOXA10-AS        |
| cg26261793 | chr1:171810468-171811325  | DNM3             |
| cg26268044 | chr10:97802872-97804262   | CCNJ; ENTPD1-AS  |
| cg26279550 | chr12:66582696-66583345   | IRAK3            |
| cg26281453 | chr17:45810590-45811388   | TBX21            |
| cg26292150 | chr3:195934213-195934446  | ZDHHC19          |
| cg26297547 | chr17:58227242-58227720   | CA4              |
| cg26301389 | chr5:139047906-139048235  | CXXC5            |
| cg26303165 | chr1:228399472-228402037  | OBSCN; OBSCN-AS1 |
| cg26315862 | chr13:21520329-21520564   |                  |
| cg26322231 | chr7:138720045-138721019  | ZC3HAV1L         |
| cg26325335 | chr3:50402104-50402942    | CACNA2D2         |
| cg26330116 | chr15:37172474-37173018   |                  |
| cg26333652 | chr5:2748369-2757024      | IRX2; c5orf38    |
| cg26335633 | chr7:64029903-64030972    |                  |
| cg26349976 | chr18:21718863-21719550   | CABYR            |
| cg26381352 | chr6:33244678-33245554    | B3GALT4          |
| cg26381364 | chr12:103889149-103889843 | C12orf42         |
| cg26386852 | chr3:48693119-48694768    | CELSR3           |
| cg26388816 | chr12:568703-570362       | B4GALNT3         |
| cg26397188 | chr12:65514879-65515863   | WIF1             |
| cg26415547 | chr12:66582696-66583345   | IRAK3            |
| cg26421310 | chr1:25255528-25259005    | RUNX3            |
| cg26422488 | chr5:16935556-16936408    | MYO10            |
| cg26425933 | chr10:115999009-115999603 | VWA2             |
| cg26434983 | chr15:89952272-89953061   |                  |
| cg26444528 | chr13:58206527-58208930   | PCDH17           |
| cg26447413 | chr9:89560585-89562647    | GAS1; GAS1RR     |
| cg26448406 | chr22:32026298-32026874   | PISD             |
| cg26460092 | chr15:83775862-83776922   | TM6SF1           |
| cg26468007 | chr7:4998406-4998950      | MMD2             |
| cg26468478 | chr3:48693119-48694768    | CELSR3           |
| cg26470101 | chr2:173099483-173100098  |                  |
| cg26472636 | chr5:1594239-1595027      | SDHAP3           |
| cg26476852 | chr7:27203916-27206462    | HOXA9            |



|            |                           |                      |
|------------|---------------------------|----------------------|
| cg26477573 | chr19:15342627-15343181   | EPHX3                |
| cg26482893 | chrX:108867763-108868486  | KCNE1L               |
| cg26492368 | chr10:22634001-22634862   | SPAG6                |
| cg26503073 | chr7:6703504-6704075      |                      |
| cg26506212 | chrX:100740222-100740601  |                      |
| cg26509691 | chr5:134363093-134365146  | PITX1                |
| cg26517714 | chr5:170735170-170739863  | TLX3; AC091980.2     |
| cg26521404 | chr7:27203916-27206462    | HOXA9                |
| cg26526379 | chr7:26415747-26416891    |                      |
| cg26537209 | chr16:54317822-54324604   | IRX3                 |
| cg26540905 | chr2:71693165-71694127    | DYSF                 |
| cg26558485 | chr1:47489227-47489633    | CYP4X1               |
| cg26560222 | chr1:50884229-50891471    | DMRTA2               |
| cg26570179 | chr8:99960498-99961438    | OSR2                 |
| cg26575690 | chr15:34728788-34729495   |                      |
| cg26595643 | chr10:118899248-118900329 | VAX1                 |
| cg26599006 | chr22:19136294-19138512   | GSC2                 |
| cg26609631 | chr13:28366550-28368505   | GSX1                 |
| cg26612727 | chr17:38024146-38024637   | ZBPB2                |
| cg26614816 | chr12:104697349-104697984 | EID3; TXNRD1         |
| cg26618041 | chr19:19651843-19652047   | CILP2                |
| cg26620530 | chr12:115102688-115103982 |                      |
| cg26654798 | chr15:83951981-83953930   | BNC1                 |
| cg26659805 | chr19:2250561-2253959     | JSRP1; AMH           |
| cg26663651 | chr7:139167481-139168712  | KLRG2                |
| cg26669806 | chr19:18899038-18902284   | COMP                 |
| cg26673012 | chr7:35292986-35294674    | TBX20                |
| cg26674943 | chr15:76627524-76627838   | ISL2                 |
| cg26675876 | chr8:11059012-11059242    | XKR6                 |
| cg26680520 | chr8:144822012-144822805  |                      |
| cg26690949 | chr20:58507756-58509517   | FAM217B; SYCP2       |
| cg26698460 | chr19:58715221-58716033   | ZNF274               |
| cg26700716 | chr2:183730809-183731357  | FRZB                 |
| cg26709285 | chr20:48098513-48099560   | KCNB1                |
| cg26714410 | chr13:45149971-45152288   | TSC22D1; TSC22D1-AS1 |
| cg26715571 | chr19:50554013-50554492   |                      |
| cg26717554 | chr19:852856-853495       | ELANE                |
| cg26727435 | chr22:50453057-50454137   | TTL8                 |
| cg26734888 | chr19:37825102-37825756   | HKR1                 |
| cg26735846 | chr10:124894076-124897366 | HMX3                 |
| cg26742995 | chr17:43339125-43339832   | SPATA32              |
| cg26751792 | chr19:15580383-15580863   | PGLYRP2              |
| cg26782108 | chr17:6616423-6617471     | SLC13A5              |
| cg26790247 | chr3:147108512-147111703  | ZIC4                 |
| cg26797073 | chr2:131129719-131130511  | PTPN18               |
| cg26802291 | chr19:19371676-19372393   | HAPLN4               |
| cg26807961 | chr19:47776371-47778740   | INAFM1               |
| cg26818735 | chr7:19156051-19158042    | TWIST1               |
| cg26822097 | chr22:17081937-17082595   | TPTEP1               |
| cg26833652 | chr12:102036254-102036461 | MYBPC1               |

|            |                           |                    |
|------------|---------------------------|--------------------|
| cg26839871 | chr1:171810468-171811325  | DNM3               |
| cg26844246 | chr5:170735170-170739863  | TLX3               |
| cg26855801 | chr2:45176729-45177264    |                    |
| cg26857670 | chr7:27225051-27225629    | HOXA11-AS; HOXA11  |
| cg26859365 | chr12:52240773-52242547   |                    |
| cg26859841 | chr1:228744111-228784168  | RHO; DUSP5P1       |
| cg26860935 | chr4:1407447-1408014      |                    |
| cg26870803 | chr11:66623621-66626614   | LRFN4; PC          |
| cg26875805 | chr1:166889777-166890649  | ILDR2              |
| cg26878949 | chr9:98278129-98279754    | PTCH1              |
| cg26890189 | chr19:47950870-47951566   | SLC8A2             |
| cg26915558 | chr11:68181087-68181289   | LRP5               |
| cg26919818 | chr5:177540208-177541234  | N4BP3              |
| cg26923490 | chr19:49575130-49576076   | KCNA7              |
| cg26928125 | chr11:69517841-69519929   | FGF19              |
| cg26931862 | chr12:54348696-54349378   | HOXC12             |
| cg26946821 | chr17:35291900-35300875   | LHX1; LHX1-DT      |
| cg26949694 | chr11:27742060-27742273   | BDNF               |
| cg26953749 | chr12:122667649-122668038 | LRRC43             |
| cg26954625 | chr19:19738573-19739821   | LAPAR2             |
| cg26955987 | chr12:3862069-3862606     | CRACR2A; EFCAB4B   |
| cg26958124 | chr19:46032305-46032855   | OPA3               |
| cg26961808 | chr7:128470444-128471161  | FLCN               |
| cg26966124 | chr6:100912072-100913337  | SIM1               |
| cg26980244 | chr8:24770909-24772547    | NEFM               |
| cg26983469 | chr10:17270431-17272617   | VIM; VIM-AS1       |
| cg26990587 | chr7:100253783-100254150  | ACTL6B             |
| cg26998044 | chr17:8868470-8869372     | PIK3R5             |
| cg27005794 | chr2:109744586-109746833  | SH3RF3; SH3RF3-AS1 |
| cg27009703 | chr7:27203916-27206462    | HOXA9              |
| cg27011480 | chr6:30227321-30228255    | HCG17              |
| cg27018380 | chr14:93389246-93389899   | CHGA               |
| cg27021986 | chr15:41803444-41805531   | LTK                |
| cg27028760 | chr16:2041826-2043026     | SYNGR3             |
| cg27032146 | chr7:96651964-96652246    | DLX5               |
| cg27041794 | chr10:11059443-11060524   | CELF2              |
| cg27043726 | chr8:101661672-101662022  | SNX31              |
| cg27045999 | chr15:81426500-81426702   | C15orf26           |
| cg27049766 | chr19:58220190-58220517   | ZNF154; ZNF551     |
| cg27051315 | chr2:238864316-238865170  |                    |
| cg27056599 | chr17:21279507-21281574   | KCNJ12             |
| cg27067781 | chr6:32116591-32117229    | PRRT1              |
| cg27071152 | chr7:39649254-39649510    |                    |
| cg27071460 | chr5:40679503-40682081    | PTGER4; TTC33      |
| cg27076454 | chr2:236578081-236580153  | AGAP1              |
| cg27085741 | chr7:143042509-143042867  | CLCN1              |
| cg27090062 | chr5:92939796-92940216    |                    |
| cg27093143 | chr19:36360265-36360835   | APLP1              |
| cg27111463 | chr2:88751336-88752865    | FOXI3              |
| cg27114644 | chr2:121344551-121345341  |                    |

|            |                           |                   |
|------------|---------------------------|-------------------|
| cg27118059 | chr21:32929928-32932017   | TIAM1; AP000251.1 |
| cg27127017 | chr12:113592204-113592620 | CCDC42B           |
| cg27136844 | chr3:147142182-147142391  |                   |
| cg27142536 | chr11:20618198-20619920   | SLC6A5            |
| cg27147819 | chr20:21376359-21378245   | NKX2-4            |
| cg27166033 | chr22:46929318-46934861   | CELSR1            |
| cg27177554 | chr10:16561605-16563822   | C1QL3             |
| cg27212234 | chr19:36048557-36049673   | ATP4A             |
| cg27226949 | chr13:107186469-107189024 | EFNB2             |
| cg27232866 | chr1:43250763-43251082    |                   |
| cg27239157 | chr3:183145428-183146790  | MCF2L2            |
| cg27252696 | chr6:100912072-100913337  | SIM1              |
| cg27260772 | chr6:50791111-50791573    | TFAP2B            |
| cg27262412 | chr1:119529820-119530712  | TBX15             |
| cg27272677 | chr10:102891011-102891794 | TLX1; TLX1NB      |
| cg27280575 | chr20:44540446-44540957   | PLTP              |
| cg27282900 | chr6:30095174-30095610    |                   |
| cg27288226 | chr19:57617602-57618448   |                   |
| cg27304020 | chr6:28956107-28956578    |                   |
| cg27304406 | chr15:83951981-83953930   | BNC1              |
| cg27306119 | chr2:9143128-9144630      | MBOAT2            |
| cg27323784 | chr11:116450660-116451912 |                   |
| cg27331241 | chr7:751713-752150        | PRKAR1B           |
| cg27353143 | chr19:38307879-38308526   | ZNF573            |
| cg27356513 | chr7:27265159-27265493    |                   |
| cg27360326 | chr13:53419898-53422872   | PCDH8             |
| cg27362525 | chr17:5019638-5019879     | ZNF232; USP6      |
| cg27364741 | chr2:63281035-63281347    | OTX1              |
| cg27376182 | chr16:3232836-3234048     |                   |
| cg27382405 | chr12:49942787-49943435   | KCNH3             |
| cg27392792 | chr7:158379329-158381221  | PTPRN2            |
| cg27393010 | chr7:121940007-121940648  | FEZF1             |
| cg27395939 | chr11:17373020-17373665   | NCR3LG1           |
| cg27404023 | chr2:162283582-162284677  | TBR1              |
| cg27405791 | chr4:41882451-41882964    |                   |
| cg27417609 | chr16:68676451-68676843   | CDH3              |
| cg27424995 | chr1:27901661-27902688    | AHDC1             |
| cg27434368 | chr19:19650684-19651274   | CILP2             |
| cg27452341 | chr7:143042509-143042867  | CLCN1             |
| cg27454064 | chr12:64215500-64215990   |                   |
| cg27456468 | chr2:200333688-200334172  | STAB2             |
| cg27478242 | chr12:54611596-54612038   |                   |
| cg27478313 | chr6:1624186-1625468      | GMDS              |
| cg27496526 | chr15:41803444-41805531   | LTK               |
| cg27504802 | chr1:231297813-231299777  | TRIM67            |
| cg27505047 | chrX:133683175-133685463  | LINC00629         |
| cg27506082 | chr2:207139337-207140031  | ZDBF2             |
| cg27507687 | chr3:48631883-48632901    | COL7A1            |
| cg27513979 | chr13:96742139-96744162   | HS6ST3            |
| cg27522060 | chr15:65360025-65360542   | RASL12            |

|            |                           |                  |
|------------|---------------------------|------------------|
| cg27537203 | chr1:38510103-38513642    | POU3F1           |
| cg27549878 | chr19:38886110-38886615   | SPRED3           |
| cg27552679 | chr15:74425092-74428821   | ISLR2            |
| cg27558479 | chr2:74425445-74426423    | MTHFD2           |
| cg27574000 | chr14:36002599-36005013   | INSM2            |
| cg27578811 | chr15:83315117-83317541   | CPEB1; CPEB1-AS1 |
| cg27587125 | chr1:109203594-109204378  | HENMT1           |
| cg27595860 | chr8:145555343-145562310  | SCRT1            |
| cg27605748 | chr5:42951077-42952410    |                  |
| cg27616541 | chr17:40837023-40837525   | CNTNAP1          |
| cg27633530 | chr7:50343758-50344519    | IKZF1            |
| cg27636310 | chr1:46632690-46632932    | PIK3R3           |
| cg27649073 | chr10:104000255-104001741 | PITX3            |
| cg27649239 | chr15:68115486-68122575   | SKOR1            |
| cg27655158 | chr4:1396292-1401730      |                  |
| cg27663938 | chr12:103696091-103696418 | c12orf42         |

**Table S2**

| CpG site (hg19)_Illumina 450K Array | CGI (hg19)                | Gene name   |
|-------------------------------------|---------------------------|-------------|
| cg00029353                          | chr12:52240773-52242547   |             |
| cg00030422                          | chr3:38080629-38081187    | DLEC1       |
| cg00108164                          | chr2:263401-265238        | SH3YL1      |
| cg00114029                          | chr1:35350879-35351854    | DLGAP3      |
| cg00117172                          | chr1:25255528-25259005    | RUNX3       |
| cg00121634                          | chr3:169529876-169530435  | LRRC34      |
| cg00121843                          | chr13:33923931-33924781   | STARD13     |
| cg00133595                          | chr16:31225957-31228264   | TRIM72      |
| cg00155526                          | chr5:32709911-32714450    | NPR3        |
| cg00157796                          | chr6:159589637-159591319  |             |
| cg00164949                          | chr17:43037167-43037740   | C1QL1       |
| cg00292664                          | chr10:71077947-71079377   | HK1         |
| cg00370229                          | chr6:29521111-29521833    |             |
| cg00393798                          | chr11:8615398-8615889     | STK33       |
| cg00456086                          | chr3:197281606-197283128  | BDH1        |
| cg00527440                          | chr2:242549374-242549995  | THAP4       |
| cg00544436                          | chr6:34202568-34206193    | HMGA1       |
| cg00556112                          | chr11:636907-640628       | DRD4        |
| cg00584713                          | chr1:213123648-213125092  | VASH2       |
| cg00599393                          | chr8:22457124-22457753    | C8orf58     |
| cg00612595                          | chr21:47717236-47718059   | YBEY        |
| cg00626110                          | chr10:134597358-134602649 | NKX6-2      |
| cg00648301                          | chr20:20344401-20350605   | INSM1       |
| cg00723271                          | chr14:102247661-102248279 | PPP2R5C     |
| cg00731785                          | chr4:15704641-15705000    | BST1        |
| cg00753478                          | chr12:21810489-21810766   | LDHB        |
| cg00773413                          | chr10:77155129-77169600   | ZNF5 3-AS2  |
| cg00803088                          | chr10:43600147-43601165   | RET         |
| cg00806198                          | chr17:72968168-72969164   | HID1        |
| cg00817367                          | chr12:52400468-52401696   | GRASP       |
| cg00864183                          | chr17:48045789-48047207   | DLX4        |
| cg00896540                          | chr8:82192379-82193685    | FABP5       |
| cg00909646                          | chr8:67873389-67875600    | TCF24       |
| cg00914041                          | chr8:91997231-91997906    | LOC1 127983 |
| cg00922376                          | chr1:14026482-14027200    | PRDM2       |
| cg00971050                          | chr17:40573741-40575526   | PTRF        |
| cg00995327                          | chr3:142837886-142840838  | CHST2       |
| cg01009697                          | chr9:87283179-87285704    | NTRK2       |
| cg01060026                          | chr3:129323916-129325332  | PLXND1      |
| cg01076997                          | chr22:37815804-37816477   | ELFN2       |
| cg01108118                          | chr6:391189-393790        | IRF4        |
| cg01112965                          | chr19:38852312-38853485   | CATSPERG    |
| cg01143804                          | chr4:40751843-40752493    | NSUN7       |
| cg01163842                          | chr14:95234613-95236569   | GSC         |
| cg01246835                          | chr7:6703504-6704075      | AK1233      |
| cg01268683                          | chr19:53141176-53141813   | ZNF83       |

|            |                           |                         |
|------------|---------------------------|-------------------------|
| cg01373292 | chr1:7764594-7765856      | CAMTA1                  |
| cg01419831 | chr2:162283582-162284677  |                         |
| cg01420426 | chr1:41831977-41832542    |                         |
| cg01423964 | chr1:111216245-111217937  | KCNA3                   |
| cg01445942 | chr7:72847934-72850032    | FZD9                    |
| cg01485998 | chr1:213123648-213125092  | VASH2                   |
| cg01490894 | chr6:26550783-26551114    |                         |
| cg01535733 | chr6:153450993-153452792  | RGS17                   |
| cg01556502 | chr14:103655242-103655928 | LINC 6 5                |
| cg01565320 | chr4:42399153-42400802    | SHISA3                  |
| cg01579950 | chr11:64480200-64481344   | NRXN2                   |
| cg01627847 | chr17:43339125-43339832   | SPATA32; MAP3K14-AS1    |
| cg01645753 | chr15:83315117-83317541   | CPEB1                   |
| cg01649597 | chr2:232394764-232395337  | NMUR1                   |
| cg01696193 | chr6:56818874-56820308    | BEND6                   |
| cg01718447 | chr7:30721373-30722445    | CRHR2                   |
| cg01720033 | chr17:62774367-62777797   | 3PTFP1-KPNA2P3; ARHGAP2 |
| cg01725199 | chr9:101569906-101570349  | GALNT12                 |
| cg01765249 | chr17:59473061-59483266   | TBX2                    |
| cg01824969 | chr8:67873389-67875600    | TCF24                   |
| cg01833196 | chr10:105452339-105453230 | SH3PXD2A                |
| cg01851088 | chr3:48698336-48701667    | CELSR3                  |
| cg01901107 | chr7:150747977-150748519  | ASIC3                   |
| cg01913455 | chr17:59473061-59483266   | TBX2                    |
| cg01939477 | chr11:43602546-43603215   | MIR129-2                |
| cg01981601 | chr8:60032533-60032746    |                         |
| cg01992990 | chr1:202779791-202780684  | KDM5B-AS1               |
| cg01995480 | chr22:45403037-45406372   | PHF21B                  |
| cg01996714 | chr20:3218579-3220930     | SLC4A11                 |
| cg02009088 | chr5:139227606-139228279  | NRG2                    |
| cg02011074 | chr1:171810468-171811325  | DNM3                    |
| cg02017200 | chr19:49255779-49256495   | FUT1                    |
| cg02096396 | chr2:26395417-26395620    | GAREML                  |
| cg02119927 | chr10:71077947-71079377   | HK1                     |
| cg02132470 | chr7:98467024-98468058    | TMEM13                  |
| cg02147764 | chr2:45169506-45171884    | SIX3                    |
| cg02215070 | chr7:134143116-134144063  | AKR1B1                  |
| cg02227867 | chr8:22457124-22457753    | C8orf58                 |
| cg02325540 | chr10:94833273-94835256   | CYP26A1                 |
| cg02330121 | chr6:118228043-118229811  | SLC35F1                 |
| cg02337836 | chr1:110210582-110210956  | GSTM2                   |
| cg02349096 | chr19:11450017-11450414   | RAB3D                   |
| cg02362385 | chr19:19738573-19739821   | LPAR2                   |
| cg02396496 | chr17:74533282-74534566   | PRCD; CYGB              |
| cg02408775 | chr12:48206722-48207126   | HDAC7                   |
| cg02433564 | chr6:37673309-37673774    |                         |
| cg02434443 | chr11:15136059-15136545   | INSC                    |
| cg02457680 | chr1:154474108-154475699  | TDRD1                   |
| cg02466113 | chr4:76555367-76556079    | CDKL2                   |
| cg02511231 | chr5:170735170-170739863  | TLX3                    |

|            |                           |                      |
|------------|---------------------------|----------------------|
| cg02553663 | chr17:80291021-80292394   | SECTM1               |
| cg02578368 | chr6:26250437-26250827    | HIST1H3F             |
| cg02586551 | chr11:73693703-73694802   | UCP2                 |
| cg02590401 | chr19:48983563-48984175   | CYTH2                |
| cg02636041 | chr10:43697778-43698177   | RASGEF1A             |
| cg02659086 | chr11:67350929-67351953   | GSTP1                |
| cg02659794 | chr12:21810489-21810766   | LDHB                 |
| cg02668581 | chr2:216877900-216878352  | MREG                 |
| cg02675308 | chr4:76555367-76556079    | CDKL2                |
| cg02685896 | chr17:27038085-27038919   | PROCA1               |
| cg02699694 | chr2:9143128-9144630      | MBOAT2               |
| cg02716516 | chr3:45837481-45838256    | SLC6A2               |
| cg02746869 | chr10:17270431-17272617   | VIM                  |
| cg02788401 | chr17:48585386-48586167   | MYCBPAP              |
| cg02831587 | chr11:13689589-13690724   | FAR1                 |
| cg02858118 | chr3:48693119-48694768    | CELSR3               |
| cg02884176 | chr2:88751336-88752865    | FOXI3                |
| cg02884239 | chr17:75368689-75370506   | SEPTIN9              |
| cg02886408 | chr10:133794899-133796598 | BNIP3                |
| cg02909790 | chr6:26271346-26271588    | HIST1H3G             |
| cg02912326 | chr6:97284831-97285782    | GPR63                |
| cg02919936 | chr8:70981874-70984888    | PRDM14               |
| cg03024619 | chr3:71802561-71804209    | EIF4E3               |
| cg03048083 | chr17:43339125-43339832   | SPATA32; MAP3K14-AS1 |
| cg03063639 | chr15:83775862-83776922   | TM6SF1               |
| cg03070194 | chr1:110210582-110210956  | GSTM2                |
| cg03073402 | chr19:42927286-42928598   | LIPE                 |
| cg03109306 | chr11:123524734-123525685 | SCN3B                |
| cg03113878 | chr7:100091181-100091598  | NYAP1                |
| cg03200052 | chr1:223536843-223538628  | SUSD4                |
| cg03208016 | chr1:180123556-180124584  | QSOX1                |
| cg03217795 | chr16:23846942-23848102   | PRKCB                |
| cg03306374 | chr16:23846942-23848102   | PRKCB                |
| cg03308628 | chr12:95941907-95942979   | USP44                |
| cg03309253 | chr19:41119032-41120394   | LTBP4                |
| cg03321592 | chr1:19991147-19992788    | HTR6                 |
| cg03326059 | chr11:13689589-13690724   | FAR1                 |
| cg03410231 | chr7:143042509-143042867  | CLCN1                |
| cg03423149 | chr11:63766059-63768666   | MACROD1              |
| cg03444245 | chr11:45376932-45377243   | LOC1 1928812         |
| cg03455458 | chr1:213123648-213125092  | VASH2                |
| cg03468349 | chr2:263401-265238        | SH3YL1               |
| cg03506033 | chr11:75378417-75379882   | MAP6                 |
| cg03509671 | chr3:101497831-101498648  | NXPE3                |
| cg03517376 | chr16:30389036-30390631   | MYLPF                |
| cg03585419 | chr19:54369388-54369809   | MYADM                |
| cg03607359 | chr5:176056521-176057494  | SNCB                 |
| cg03612722 | chr22:27053082-27053629   | MIAT                 |
| cg03666741 | chr11:9025096-9026315     | NRIP3                |
| cg03671191 | chr19:52207133-52207731   | SPACA6               |

|            |                           |                |
|------------|---------------------------|----------------|
| cg03695666 | chr19:38210108-38210692   | ZNF6 7         |
| cg03705926 | chr19:6740670-6741203     | TRIP1          |
| cg03710719 | chr19:36389546-36389967   | NFKBID         |
| cg03720581 | chr11:506354-508009       | RNH1           |
| cg03755177 | chr7:44349112-44349716    | CAMK2B         |
| cg03766620 | chr2:127783082-127783311  |                |
| cg03768777 | chr1:213123648-213125092  | VASH2          |
| cg03776464 | chr2:222436035-222438941  | EPHA4          |
| cg03780132 | chr5:42951077-42952410    |                |
| cg03786933 | chr16:69760294-69760506   | NQO1           |
| cg03787864 | chr16:88716990-88717606   | CYBA           |
| cg03803071 | chr19:22034395-22034943   | ZNF43          |
| cg03804136 | chr17:75368689-75370506   | SEPTIN9        |
| cg03825010 | chr5:159399005-159399928  | ADRA1B         |
| cg03848381 | chr15:40573629-40576118   | ANKRD63        |
| cg03864000 | chr11:111410933-111412199 | LAYN           |
| cg03885037 | chr10:135089970-135090491 | ADAM8          |
| cg03932723 | chr11:63258379-63258804   | HRASLS5        |
| cg03957481 | chr22:50984973-50988141   | KLHDC7B        |
| cg03976877 | chr7:158936508-158938492  | VIPR2          |
| cg04008888 | chr11:68622723-68623252   |                |
| cg04012924 | chr11:13689589-13690724   | FAR1           |
| cg04035559 | chr10:71077947-71079377   | HK1            |
| cg04085025 | chr7:30028519-30029822    | SCRN1          |
| cg04093225 | chr1:166916866-166917215  | ILRD2          |
| cg04100696 | chr11:12029738-12030841   | DKK3           |
| cg04111064 | chr3:138663719-138666346  | FOXL2; FOXL2NB |
| cg04147049 | chr1:33219428-33220028    | KIAA1522       |
| cg04148762 | chr1:203598472-203598853  | ATP2B4         |
| cg04203238 | chr4:16084196-16085735    | PROM1          |
| cg04209650 | chr17:19648140-19648492   | ALDH3A1        |
| cg04221886 | chr2:44058766-44059232    | ABCG5          |
| cg04246763 | chr1:87617693-87617986    | LINC 114       |
| cg04281464 | chr14:70014544-70014993   |                |
| cg04293902 | chr10:134597358-134602649 | NKX6-2         |
| cg04321866 | chr13:107186469-107189024 | EFNB2          |
| cg04361852 | chr11:73693703-73694802   | UCP2           |
| cg04365224 | chr3:72788073-72788416    |                |
| cg04395369 | chr19:19738573-19739821   | LPAR2          |
| cg04407470 | chr6:108485672-108490539  | NR2E1          |
| cg04426311 | chr3:3840514-3842772      | LRRN1          |
| cg04487931 | chr1:28199032-28199257    | THEMIS2        |
| cg04497176 | chr19:34972055-34973645   | WTIP           |
| cg04502985 | chr5:77268351-77268787    |                |
| cg04515996 | chr6:85472703-85474132    | TBX18          |
| cg04550737 | chr1:119529820-119530712  | TBX15          |
| cg04557125 | chr4:41883493-41884570    | LINC 682       |
| cg04564920 | chr3:122296613-122296828  | PARP15         |
| cg04618002 | chr7:5632336-5634555      | FSCN1          |
| cg04638468 | chr4:122685861-122686565  | TMEM155        |



|            |                           |                         |
|------------|---------------------------|-------------------------|
| cg04652621 | chr7:150671807-150672370  | KCNH2                   |
| cg04673590 | chr7:27135343-27136736    | HOTAIRM1                |
| cg04743654 | chr3:50377804-50378540    | RASSF1                  |
| cg04779720 | chr1:11919116-11919555    |                         |
| cg04781274 | chr16:67034471-67035340   | CES4A                   |
| cg04787024 | chr2:99552186-99553831    | KIAA1211L               |
| cg04805619 | chr3:167097928-167098198  | ZBBX                    |
| cg04823311 | chr7:28995306-28998541    | TRIL                    |
| cg04907523 | chr1:213123648-213125092  | VASH2                   |
| cg04920358 | chr8:49468684-49468959    | LOC1 1929268            |
| cg04920951 | chr11:67350929-67351953   | GSTP1                   |
| cg04970117 | chr3:45837481-45838256    | SLC6A2                  |
| cg04981611 | chr2:47796924-47799166    | MSH2                    |
| cg04992638 | chr17:43339125-43339832   | SPATA32; MAP3K14-AS1    |
| cg05040544 | chr13:107186469-107189024 | EFNB2                   |
| cg05095158 | chr11:13030331-13032584   | RASSF1                  |
| cg05099508 | chr10:22634001-22634862   | SPAG6                   |
| cg05106897 | chr6:34433412-34434371    | PACSN1                  |
| cg05184938 | chr17:75368689-75370506   | SEPTIN9                 |
| cg05297854 | chr22:50623165-50625226   | TRABD                   |
| cg05309948 | chr11:2290105-2292932     |                         |
| cg05327835 | chr4:995483-997541        | IDUA                    |
| cg05337743 | chr19:54369388-54369809   | MYADM                   |
| cg05346841 | chr1:14026482-14027200    | PRDM2                   |
| cg05347898 | chr6:24357720-24358309    | DCDC2; KAAG1            |
| cg05377226 | chr1:171810468-171811325  | DNM3                    |
| cg05386493 | chr3:138663719-138666346  | FOXL2; FOXL2NB          |
| cg05457344 | chr6:26251899-26252233    | HIST1H2BH               |
| cg05488523 | chr17:79478236-79482426   | ACTG1                   |
| cg05495949 | chr7:4922708-4923576      | RADIL                   |
| cg05519781 | chr21:40032244-40033665   | ERG                     |
| cg05529506 | chr18:44526867-44527137   | KATNAL2                 |
| cg05545132 | chr2:144694667-144695180  | LOC1 1928386            |
| cg05554936 | chr19:11450017-11450414   | RAB3D                   |
| cg05569109 | chr2:166649910-166650966  | GALNT3                  |
| cg05617413 | chr12:133065844-133066393 |                         |
| cg05629186 | chr6:27356493-27357020    | ZNF391                  |
| cg05639679 | chr1:33219428-33220028    | KIAA1522                |
| cg05663341 | chr7:96634623-96634915    | DLX6-AS1                |
| cg05684891 | chr9:124460968-124461361  | DAB2IP                  |
| cg05714219 | chr2:31360322-31361821    | GALNT14                 |
| cg05720261 | chr1:40105011-40105707    | HEYL                    |
| cg05721365 | chr17:62774367-62777797   | BPTFP1-KPNA2P3; ARHGAP2 |
| cg05739190 | chr10:97802872-97804262   | CCNJ; ENTPD1-AS1        |
| cg05751100 | chr6:26550783-26551114    |                         |
| cg05766140 | chr6:391189-393790        | IRF4                    |
| cg05770238 | chr1:26686517-26687281    |                         |
| cg05843841 | chr11:76381450-76382295   | LRRC32                  |
| cg05871997 | chr6:56818874-56820308    | DST; BEND6              |
| cg05933935 | chr1:6051596-6052955      | NPHP4; KCNAB2           |

|            |                           |                |
|------------|---------------------------|----------------|
| cg05994148 | chr6:34433412-34434371    | PACSIN1        |
| cg06036912 | chr16:3067522-3068358     | CLDN6          |
| cg06040206 | chr2:172959268-172962054  |                |
| cg06048524 | chr10:44879715-44882391   | CXCL12         |
| cg06073471 | chr3:101497831-101498648  | NXPE3          |
| cg06186698 | chr3:138663719-138666346  | FOXL2NB; FOXL2 |
| cg06196147 | chr3:128712405-128713058  | KIAA1257       |
| cg06211893 | chr1:171810468-171811325  | DNM3           |
| cg06215569 | chr1:110610266-110613303  | ALX3           |
| cg06223767 | chr6:391189-393790        | IRF4           |
| cg06241292 | chr3:49314438-49314815    | USP4           |
| cg06270244 | chr15:78933188-78933821   | CHRN4          |
| cg06341513 | chr11:61275826-61277329   | LRRC1 B        |
| cg06366062 | chr17:30813178-30815239   | CDK5R1         |
| cg06377278 | chr1:25255528-25259005    | RUNX3          |
| cg06396724 | chr14:61188117-61190772   | SIX4           |
| cg06399148 | chr8:104152727-104153390  | BAALC          |
| cg06431702 | chr11:66623621-66626614   | LRFN4; PC      |
| cg06463958 | chr6:166579974-166583423  | TBXT           |
| cg06472476 | chr19:54369388-54369809   | MYADM          |
| cg06611810 | chr19:41316544-41317318   | CYP2T1P        |
| cg06665109 | chr19:54369388-54369809   | MYADM          |
| cg06686029 | chr20:30777757-30778329   | TSPY26P        |
| cg06741043 | chr15:68870634-68871974   | CORO2B         |
| cg06749789 | chr2:242549374-242549995  | THAP4          |
| cg06782692 | chr10:134120448-134122422 | STK32C         |
| cg06790860 | chr16:69760294-69760506   | NQO1           |
| cg06825142 | chr11:636907-640628       | DRD4           |
| cg06848185 | chr17:75368689-75370506   | SEPTIN9        |
| cg06893138 | chr1:228645197-228646434  | HIST3H2A       |
| cg06897264 | chr6:28979247-28979499    |                |
| cg06905726 | chr19:18209912-18210268   | MAST3          |
| cg06913330 | chr4:2059929-2063181      | NAT8L          |
| cg06921552 | chr11:69258150-69258544   |                |
| cg06933574 | chr5:134368579-134370466  | PITX1          |
| cg06947913 | chr12:50297581-50297988   | FAIM2          |
| cg06992285 | chr8:99952021-99954686    | STK3           |
| cg07036412 | chr6:24360030-24360411    | DCDC2          |
| cg07044708 | chr15:75470912-75471212   |                |
| cg07049552 | chr16:30204696-30206485   | SLX1A          |
| cg07074543 | chr3:119041383-119042255  | ARHGAP31       |
| cg07076076 | chr16:1458144-1458435     | UNKL           |
| cg07095997 | chr14:61188117-61190772   | SIX4           |
| cg07137955 | chr5:42992034-42992955    | AK 56817       |
| cg07138355 | chr6:26550783-26551114    |                |
| cg07167423 | chr1:36042433-36043444    | TFAP2E         |
| cg07219542 | chr1:110210582-110210956  | GSTM2          |
| cg07230107 | chr1:224803638-224805314  | CNIH2          |
| cg07276415 | chr11:46354092-46355190   | DGKZ           |
| cg07352345 | chr5:175792356-175793505  | ARL1           |

|            |                           |                      |
|------------|---------------------------|----------------------|
| cg07380496 | chr5:71402878-71404868    | MAP1B                |
| cg07399369 | chr3:142837886-142840838  | CHST2                |
| cg07435294 | chr11:65553750-65555573   | OVOL1                |
| cg07451080 | chr3:44036408-44041104    |                      |
| cg07513622 | chr7:18125915-18127009    | HDAC9                |
| cg07528613 | chr19:53073309-53074039   | ZNF7 1               |
| cg07561017 | chr12:48397890-48398731   | COL2A1               |
| cg07589773 | chr7:50343758-50344519    | IKZF1                |
| cg07622404 | chr3:101497831-101498648  | NXPE3                |
| cg07688604 | chr12:133065844-133066393 |                      |
| cg07689503 | chr2:74425445-74426423    | MTHFD2               |
| cg07702750 | chr7:28995306-28998541    | TRIL                 |
| cg07791578 | chr6:24357720-24358309    | DCDC2                |
| cg07799366 | chr6:52226754-52228006    | PAQR8                |
| cg07844931 | chr16:58018401-58019471   | TEPP                 |
| cg07846311 | chr4:57371583-57372022    | ARL9                 |
| cg07878486 | chr19:58951215-58952250   | ZNF132               |
| cg07879739 | chr22:38220590-38221619   | GALR3                |
| cg07888856 | chr6:137242316-137245442  | SLC35D3              |
| cg07960067 | chr2:9143128-9144630      | MBOAT2               |
| cg07987843 | chr12:3308813-3310270     | TSPAN9               |
| cg07993547 | chr19:18209912-18210268   | MAST3                |
| cg08034379 | chr2:228736231-228736544  | DAW1                 |
| cg08042316 | chr7:139930066-139930356  |                      |
| cg08081805 | chr19:49242019-49242962   | RASIP1               |
| cg08100565 | chr3:140660335-140661602  | SLC25A36             |
| cg08101407 | chr20:30777757-30778329   | TSYP26P              |
| cg08173692 | chr6:166720240-166722275  | PRR18                |
| cg08187418 | chr2:74425445-74426423    | MTHFD2               |
| cg08196842 | chr14:65016517-65016909   | PPP1R36              |
| cg08226111 | chr14:36002599-36005013   | INSM2                |
| cg08228715 | chr17:79894669-79895533   | PYCR1                |
| cg08247376 | chr17:43339125-43339832   | SPATA32; MAP3K14-AS1 |
| cg08249424 | chr6:4775132-4777550      | CDYL                 |
| cg08296680 | chr17:80186136-80189990   | SLC16A3              |
| cg08296831 | chr11:65553750-65555573   | OVOL1                |
| cg08303146 | chr11:2466248-2466818     | KCNQ1                |
| cg08347500 | chr16:54315603-54316104   |                      |
| cg08407114 | chr5:36690208-36690658    |                      |
| cg08444220 | chr10:134597358-134602649 | NKX6-2               |
| cg08452658 | chr15:83775862-83776922   | TM6SF1               |
| cg08460435 | chr1:109203594-109204378  | HENMT1               |
| cg08465862 | chr10:3108651-3111419     | PFKP                 |
| cg08482682 | chr11:107798959-107799980 | RAB39A               |
| cg08494905 | chr6:37663762-37667102    | MDGA1                |
| cg08495115 | chr15:33009531-33011696   | GREM1                |
| cg08513472 | chr6:1624186-1625468      | GMDS                 |
| cg08553437 | chr4:122685861-122686565  | TMEM155              |
| cg08682544 | chr16:66638255-66639561   | CMTM3                |
| cg08694014 | chr16:68480865-68482822   | SMPD3                |

|            |                          |                         |
|------------|--------------------------|-------------------------|
| cg08741214 | chr2:74425445-74426423   | MTHFD2                  |
| cg08763705 | chr5:139525538-139526227 |                         |
| cg08789053 | chr6:28979247-28979499   |                         |
| cg08844848 | chr3:3840514-3842772     | LRRN1                   |
| cg08848774 | chr17:43047548-43047954  |                         |
| cg08854306 | chr4:91048412-91049682   | CCSER1                  |
| cg08858437 | chr3:142837886-142840838 | CHST2                   |
| cg08862890 | chr5:169064271-169064702 | DOCK2                   |
| cg08892600 | chr1:223536843-223538628 | SUSD4                   |
| cg08892705 | chr15:99645031-99646444  | SYNM                    |
| cg08934846 | chr16:3067522-3068358    | CLDN6                   |
| cg08940787 | chr17:62774367-62777797  | PTFP1-KPNA2P3 y ARHGAP2 |
| cg08956724 | chr16:29624388-29625391  | SMG1P2                  |
| cg09118312 | chr12:21810489-21810766  | LDHB                    |
| cg09163958 | chr1:213123648-213125092 | VASH2                   |
| cg09193347 | chr15:79381805-79384209  | RASGRF1                 |
| cg09200738 | chr15:30864783-30865586  | ULK4P2                  |
| cg09233013 | chr16:66638255-66639561  | CMTM3                   |
| cg09241929 | chr20:57463653-57467739  | GNAS                    |
| cg09248054 | chr1:967967-970238       | AGRN                    |
| cg09252528 | chr19:42901017-42901375  | LIPE-AS1                |
| cg09392940 | chr2:109744586-109746833 | SH3RF3; SH3RF3-AS1      |
| cg09418984 | chr19:54369388-54369809  | MYADM                   |
| cg09420439 | chr7:27135343-27136736   | HOTAIRM1                |
| cg09433135 | chr19:46001831-46002686  | PPM1N                   |
| cg09472203 | chr15:83378008-83379068  | AP3B2                   |
| cg09614653 | chr10:22540708-22542739  | LOC1_13_992             |
| cg09616463 | chr15:72611947-72612802  | CELF6                   |
| cg09642925 | chr2:114260096-114261794 |                         |
| cg09652652 | chr3:194406441-194409045 | FAM43A                  |
| cg09654997 | chr11:46259265-46260048  |                         |
| cg09661010 | chr10:73846807-73848233  | SPOCK2                  |
| cg09691340 | chr17:42402788-42403266  |                         |
| cg09695735 | chr17:58498712-58499332  |                         |
| cg09761040 | chr19:13208344-13210525  | LYL1; NFIX              |
| cg09775582 | chr17:45810590-45811388  | TBX21                   |
| cg09793584 | chr1:156390404-156391581 | C1orf61                 |
| cg09848789 | chr1:85462586-85463435   | MCOLN2                  |
| cg09866102 | chr16:31213567-31214287  | PYCARD-AS1; PYCARD      |
| cg09868451 | chr2:74425445-74426423   | MTHFD2                  |
| cg09871079 | chr1:33358470-33359449   | HPCA                    |
| cg09894698 | chr11:2290105-2292932    | ASCL2                   |
| cg09938462 | chr22:19705511-19706557  | SEPTIN5; SEPT5-GP1BB    |
| cg09952395 | chr11:63258379-63258804  | HRASLS5                 |
| cg09992116 | chr10:71077947-71079377  | HK1                     |
| cg10023272 | chr1:110610266-110613303 | ALX3                    |
| cg10034364 | chr13:28491489-28492518  |                         |
| cg10064339 | chr11:73693703-73694802  | UCP2                    |
| cg10091994 | chr12:4378367-4382222    | CCND2; CCND2-AS1        |
| cg10106804 | chr1:35258565-35258791   | GJA4                    |

|            |                           |                      |
|------------|---------------------------|----------------------|
| cg10122865 | chr2:63283937-63284147    | OTX1                 |
| cg10154122 | chr19:38754847-38755699   | SPINT2               |
| cg10162691 | chr17:41177337-41177593   | RND2                 |
| cg10181419 | chr2:263401-265238        | chr2:2634 1-265238   |
| cg10191210 | chr5:42992034-42992955    |                      |
| cg10297491 | chr10:11059443-11060524   | CELF2                |
| cg10304922 | chr12:133065844-133066393 |                      |
| cg10333808 | chr12:22486836-22488666   | ST8SIA1              |
| cg10334767 | chr4:10458130-10459353    | ZNF518B              |
| cg10344081 | chr4:76555367-76556079    | CDKL2                |
| cg10363661 | chr16:89641054-89643415   | CPNE7                |
| cg10376598 | chr19:19738573-19739821   | LPAR2                |
| cg10379890 | chr6:391189-393790        | IRF4                 |
| cg10386298 | chr1:221050449-221050864  | HLX-AS1              |
| cg10429922 | chr15:33009531-33011696   | GREM1                |
| cg10480343 | chr15:48936811-48938577   | FBN1                 |
| cg10511618 | chr4:113435899-113438002  | NEUROG2; NEUROG2-AS1 |
| cg10523966 | chr1:39956425-39958137    | BMP8A                |
| cg10555583 | chr20:1783825-1784552     |                      |
| cg10572969 | chr11:13689589-13690724   | FAR1; FAR1-IT1       |
| cg10573386 | chr3:48698336-48701667    | CELSR3               |
| cg10611186 | chr17:30813178-30815239   | CDK5R1               |
| cg10623840 | chr3:194406441-194409045  | FAM43A               |
| cg10633601 | chr1:47696505-47698197    | TAL1                 |
| cg10637512 | chr15:99645031-99646444   | SYNM                 |
| cg10695848 | chr12:48206722-48207126   | HDAC7                |
| cg10715425 | chr1:6051596-6052955      | NPHP4; KCNAB2        |
| cg10716835 | chr10:94833273-94835256   | CYP26A1              |
| cg10723962 | chr6:26240698-26240951    | H4C6; HIST1H4F       |
| cg10800464 | chr12:109162409-109162722 |                      |
| cg10886442 | chr3:142837886-142840838  | CHST2                |
| cg10900437 | chr6:149068180-149069775  | UST                  |
| cg10904986 | chr8:145555343-145562310  | SCRT1                |
| cg10979880 | chr6:105584149-105585621  | BVES; BVES-AS1       |
| cg11012584 | chr2:242549374-242549995  | THAP4                |
| cg11068343 | chr6:24360030-24360411    | DCDC2                |
| cg11073571 | chr4:78978366-78979256    | FRAS1                |
| cg11172693 | chr20:37434207-37435592   | PPP1R16B             |
| cg11173146 | chr13:107186469-107189024 | EFNB2                |
| cg11183365 | chr6:27064629-27065004    |                      |
| cg11198128 | chr11:65601070-65601551   | SNX32                |
| cg11223367 | chr3:101497831-101498648  | NXPE3                |
| cg11235741 | chr15:82335473-82339937   | MEX3B                |
| cg11258043 | chr6:73972820-73973027    | KHDC1                |
| cg11279444 | chr1:53098630-53099303    | SHISAL2A             |
| cg11364273 | chr11:63766059-63768666   | MACROD1              |
| cg11376305 | chr19:49127389-49127720   | SPHK2                |
| cg11398523 | chr19:50316212-50316469   | FUZ                  |
| cg11459603 | chr6:26273291-26273557    | HIST1H2BI; H2BC1     |
| cg11472279 | chr10:11059443-11060524   | CELF2                |

|            |                          |                      |
|------------|--------------------------|----------------------|
| cg11474250 | chr5:107005131-107008191 | EFNA5                |
| cg11481534 | chr6:116691828-116692868 | DSE                  |
| cg11485595 | chr5:32709911-32714450   | NPR3                 |
| cg11500797 | chr7:96651964-96652246   | DLX5                 |
| cg11502745 | chr11:18742691-18743513  | IGSF22               |
| cg11509907 | chr2:235404503-235406541 | ARL4C                |
| cg11510060 | chr4:330163-332068       | ZNF141               |
| cg11521404 | chr13:20735044-20736157  | GJA3                 |
| cg11549953 | chr5:43017969-43018668   |                      |
| cg11595545 | chr1:111216245-111217937 | KCNA3                |
| cg11600807 | chr11:17373020-17373665  | NCR3LG1              |
| cg11660826 | chr6:150284683-150286515 | ULBP1                |
| cg11672054 | chr1:228645197-228646434 | HIST3H2A; HIST3H2BB  |
| cg11684022 | chr1:247494250-247495840 | ZNF496               |
| cg11686528 | chr17:1082377-1083833    | ABR                  |
| cg11694752 | chr11:75378417-75379882  | MAP6                 |
| cg11716665 | chr5:149569593-149569945 | SLC6A7               |
| cg11721803 | chr12:48397890-48398731  | COL2A1               |
| cg11737742 | chr1:110752257-110754794 | KCNC4                |
| cg11804775 | chr19:19729128-19729814  | PBX4                 |
| cg11891395 | chr7:96651964-96652246   | DLX5                 |
| cg11929643 | chr3:48698336-48701667   | CELSR3               |
| cg11940285 | chr3:129693128-129694841 | TRH                  |
| cg11973177 | chr10:17270431-17272617  | VIM; VIM-AS1         |
| cg12002882 | chr20:62461267-62462037  | ZBTB46               |
| cg12022772 | chr2:131129719-131130511 | PTPN18               |
| cg12035092 | chr2:149632683-149633882 | KIF5C                |
| cg12040486 | chr19:11959578-11960064  | ZNF439               |
| cg12041056 | chr22:27053082-27053629  | MIAT                 |
| cg12078320 | chr1:54940347-54940753   |                      |
| cg12086936 | chr11:31831621-31839038  | PAX6                 |
| cg12091732 | chr10:82116203-82117120  | DYDC2                |
| cg12177220 | chr3:38080629-38081187   | DLEC1                |
| cg12178578 | chr1:45792420-45793301   | HPDL                 |
| cg12191938 | chr10:88730555-88731632  | AGAP11; ADIRF        |
| cg12212657 | chr3:3840514-3842772     | LRRN1                |
| cg12220691 | chr19:41641308-41642082  |                      |
| cg12269002 | chr11:77122737-77123088  | PAK1                 |
| cg12281657 | chr14:65016517-65016909  | PPP1R36              |
| cg12319602 | chr5:43017969-43018668   |                      |
| cg12414653 | chr12:8123347-8123561    |                      |
| cg12457909 | chr7:39649254-39649510   | YAE1                 |
| cg12477533 | chr2:98703355-98703889   | VWA3B                |
| cg12518410 | chr2:109744586-109746833 | SH3RF3; SH3RF3-AS1   |
| cg12539796 | chr5:7849946-7850439     | c5orf49              |
| cg12631351 | chr5:80255905-80257006   | RASGRF2; RASGRF2-AS1 |
| cg12668309 | chr3:53527928-53530106   | CACNA1D              |
| cg12690148 | chr1:63782395-63790471   | FOXD3; FOXD3-AS1     |
| cg12727374 | chr3:183542497-183543804 | MAP6D1               |
| cg12796229 | chr18:12407716-12408242  | SLMO1                |

|            |                           |                         |
|------------|---------------------------|-------------------------|
| cg12825804 | chr14:77227570-77228691   | VASH1                   |
| cg12863545 | chr17:8868470-8869372     | PIK3R5                  |
| cg12927498 | chr5:141030919-141031177  | FCHSD1                  |
| cg12928379 | chr11:636907-640628       | DRD4                    |
| cg12936335 | chr6:150284683-150286515  | ULBP1                   |
| cg12992720 | chr19:19738573-19739821   | LAPAR2                  |
| cg12998491 | chr9:134151854-134153015  | FAM78A                  |
| cg13001868 | chr17:43339125-43339832   | SPATA32; MAP3K14-AS1    |
| cg13056495 | chr7:134143116-134144063  | AKR1B1                  |
| cg13066043 | chr14:24808636-24808992   | RIPK3                   |
| cg13088368 | chr20:42543098-42545137   | TOX2                    |
| cg13092806 | chr2:177042752-177043444  | HAGLR; HAGLROS          |
| cg13111733 | chr1:228645197-228646434  | HIST3H2BB; HIST3H2A     |
| cg13118906 | chr17:61523001-61524470   | CYB561                  |
| cg13177786 | chr11:10472001-10472857   | AMPD3                   |
| cg13204512 | chr17:29298047-29298606   | RNF135                  |
| cg13258989 | chr17:72968168-72969164   | HID1                    |
| cg13267747 | chr5:141030919-141031177  | FCHSD1                  |
| cg13280283 | chr6:137242316-137245442  | SLC35D3                 |
| cg13304665 | chr22:22862624-22863220   | ZNF28 B                 |
| cg13323701 | chr6:118228043-118229811  | SLC35F1                 |
| cg13325154 | chr10:104000255-104001741 | PITX3                   |
| cg13326227 | chr20:20344401-20350605   | INSM1                   |
| cg13341720 | chr19:6740670-6741203     | TRIP1                   |
| cg13355047 | chr19:4304543-4305122     | FSD1                    |
| cg13438961 | chr1:41249091-41250161    | KCNQ4                   |
| cg13476854 | chr1:119549145-119551320  |                         |
| cg13516820 | chr9:37034136-37038341    | PAX5                    |
| cg13556491 | chr19:19738573-19739821   | LAPAR2                  |
| cg13570982 | chr14:55595698-55596692   | LGALS3                  |
| cg13592399 | chr14:52534582-52536722   | NID2                    |
| cg13662093 | chr20:33865334-33865563   | MP24OS; MMP24-AS1-EDEN  |
| cg13699414 | chr5:178957434-178957900  |                         |
| cg13702005 | chr12:103889149-103889843 | C12orf42                |
| cg13717446 | chr17:62774367-62777797   | 7P1-BPTFP1-KPNA2P3; ARH |
| cg13725782 | chr6:105584149-105585621  | BVES; BVES-AS1          |
| cg13729891 | chr17:7108305-7108654     | DLG4                    |
| cg13730743 | chr19:52207133-52207731   | SPACA6                  |
| cg13755546 | chr2:74425445-74426423    | MTHFD2                  |
| cg13765939 | chr22:27053082-27053629   | MIAT                    |
| cg13768269 | chr9:112917-114839        |                         |
| cg13788515 | chr2:207139337-207140031  | ZDBF2                   |
| cg13850606 | chr1:229542944-229543770  |                         |
| cg13865488 | chr9:137299191-137299437  | RXRA                    |
| cg13877670 | chr15:53080459-53083699   | ONECUT1                 |
| cg13900100 | chr6:43970074-43970922    | c6orf223                |
| cg13913015 | chr2:47796924-47799166    | KCNK12                  |
| cg13921956 | chr2:12856626-12859019    | TRIB2                   |
| cg13974773 | chr6:27463177-27463379    |                         |
| cg13984181 | chr1:92495368-92495964    | EPHX4                   |

|            |                           |                       |
|------------|---------------------------|-----------------------|
| cg13996426 | chr3:49755764-49757317    | AMIGO3; GMPPB; RNF123 |
| cg14002345 | chr11:31831621-31839038   | PAX6                  |
| cg14015044 | chr8:22960385-22960927    | TNFRSF1 C             |
| cg14019323 | chr12:65218246-65219143   | TBC1D3                |
| cg14024461 | chr1:228645197-228646434  | HIST3H2BB; HIST3H2A   |
| cg14104369 | chr20:57463653-57467739   | GNAS                  |
| cg14117138 | chr19:46800054-46800603   | HIF3A                 |
| cg14126493 | chr5:176830276-176831639  | F12                   |
| cg14144513 | chr11:69258150-69258544   |                       |
| cg14159026 | chr6:105584149-105585621  | BVES; BVES-AS1        |
| cg14169333 | chr9:96720587-96723189    | BARX1-DT              |
| cg14178748 | chr1:153650831-153652375  | NPR1                  |
| cg14186641 | chr6:88875398-88877449    | CNR1                  |
| cg14216029 | chr19:42901017-42901375   | LIPE-AS1              |
| cg14250130 | chr10:3108651-3111419     | PFKP                  |
| cg14251622 | chr14:36002599-36005013   | INSM2                 |
| cg14263942 | chr4:76555367-76556079    | CDKL2                 |
| cg14270220 | chr12:49371691-49375550   | WNT1                  |
| cg14287235 | chr14:24803679-24804353   | ADCY4                 |
| cg14306956 | chr9:37026223-37028014    | PAX5                  |
| cg14362312 | chr9:136293567-136294160  | ADAMTS13              |
| cg14380270 | chr17:33700488-33700760   | SLFN11                |
| cg14424538 | chr20:1783825-1784552     |                       |
| cg14493920 | chr9:37034136-37038341    | PAX5                  |
| cg14498666 | chr9:21031514-21031823    | HACD4                 |
| cg14543941 | chr10:71077947-71079377   | HK1                   |
| cg14547067 | chr11:46316876-46317485   | CREB3L1               |
| cg14557534 | chr3:27762352-27763995    | EOMES                 |
| cg14572967 | chr9:35616981-35617324    | CD72                  |
| cg14592933 | chr7:26415747-26416891    |                       |
| cg14614314 | chr10:135148197-135150565 | CALY                  |
| cg14654324 | chr9:137299191-137299437  | RXRA                  |
| cg14654468 | chr17:80186136-80189990   | SLC16A3               |
| cg14663510 | chr10:124894076-124897366 | HMX3                  |
| cg14670974 | chr5:157098264-157099041  | SOX3                  |
| cg14673387 | chr10:47008085-47008410   | GPRIN2                |
| cg14676825 | chr17:27038085-27038919   | PROCA1                |
| cg14681055 | chr10:104000255-104001741 | PITX3                 |
| cg14709460 | chr7:28995306-28998541    | TRIL                  |
| cg14743594 | chr5:167956220-167957371  | FBLL1                 |
| cg14776962 | chr6:26251899-26252233    | HIST1H2BH; H2BC9      |
| cg14808890 | chr6:26250437-26250827    | HIST1H3F              |
| cg14819504 | chr2:160760605-160761452  | LY75; LY75-CD3 2      |
| cg14889643 | chr18:60985504-60985741   | BCL2                  |
| cg14897419 | chr10:134120448-134122422 | STK32C                |
| cg14986699 | chr2:149632683-149633882  | KIF5C                 |
| cg14988503 | chr4:76555367-76556079    | CDKL2                 |
| cg14993712 | chr7:138720045-138721019  | ZC3HAV1L              |
| cg14996783 | chr7:28995306-28998541    | TRIL                  |
| cg15017004 | chr18:2905951-2907348     | EMILIN2               |



|            |                           |                            |
|------------|---------------------------|----------------------------|
| cg15032314 | chr19:50096610-50096912   | PRR12                      |
| cg15044248 | chr17:75368689-75370506   | SEPTIN9                    |
| cg15104644 | chr1:231296560-231297345  | TRIM67                     |
| cg15110403 | chr19:17392384-17393775   | ANKLE1                     |
| cg15147516 | chr1:226411008-226411880  | MIXL1                      |
| cg15205527 | chr13:45885755-45886103   |                            |
| cg15264710 | chr6:33396051-33396296    | SYNGAP1                    |
| cg15267232 | chr10:8091375-8098329     | GATA3; GATA3-AS1           |
| cg15336765 | chr12:50354840-50356163   | AQP5                       |
| cg15365320 | chr11:17373020-17373665   | NCR3LG1                    |
| cg15375239 | chr19:38754847-38755699   | SPINT2                     |
| cg15386964 | chr6:26250437-26250827    | HIST1H3F                   |
| cg15412498 | chr5:71402878-71404868    | MAP1B                      |
| cg15415545 | chr16:30204696-30206485   | DLA2B; SLX1A; SLX1A-SULT1/ |
| cg15444947 | chr7:28995306-28998541    | TRIL                       |
| cg15459780 | chr12:104609398-104610172 | TXNRD1                     |
| cg15467646 | chr1:22140892-22141407    | LDLRAD2                    |
| cg15471815 | chr1:228645197-228646434  | HIST3H2BB; HIST3H2A        |
| cg15490715 | chr6:29521111-29521833    | OR2I1P                     |
| cg15491911 | chr6:167764523-167765124  |                            |
| cg15531403 | chr8:53851702-53854426    | NPBWR1                     |
| cg15602740 | chr3:120003884-120004426  | GPR156                     |
| cg15607538 | chr12:133484659-133485739 |                            |
| cg15627078 | chr13:24152900-24154140   | TNFRSF19                   |
| cg15655500 | chr18:12407716-12408242   | SLMO1                      |
| cg15679813 | chr22:45403037-45406372   | PHF21B                     |
| cg15684724 | chr8:67873389-67875600    | TCF24                      |
| cg15720669 | chr3:138663719-138666346  | FOXL2; FOXL2NB             |
| cg15732851 | chr1:203598472-203598853  | ATP2B4                     |
| cg15737319 | chr2:74425445-74426423    | MTHFD2                     |
| cg15760257 | chr17:26698360-26699557   | SARM1                      |
| cg15766101 | chr19:46518284-46520080   | CCDC61                     |
| cg15769764 | chr4:995483-997541        | IDUA                       |
| cg15775138 | chr7:127744195-127744554  |                            |
| cg15778437 | chr11:31839364-31839813   | PAX6                       |
| cg15835396 | chr7:128809090-128809393  | TSPAN33                    |
| cg15844835 | chr5:141030919-141031177  | FCHSD1                     |
| cg15866977 | chr17:79917287-79920022   | NOTUM                      |
| cg15875437 | chr4:2059929-2063181      | NAT8L                      |
| cg15969216 | chr13:45149971-45152288   | TSC22D1                    |
| cg15991309 | chr17:80291021-80292394   | SECTM1                     |
| cg15992535 | chr5:139227606-139228279  | NRG2                       |
| cg15994026 | chr4:15779999-15780729    | CD38                       |
| cg16008609 | chr1:213123648-213125092  | VASH2                      |
| cg16022575 | chr1:47902794-47905518    | FOXD2                      |
| cg16097357 | chr17:73583839-73586337   | MYO15B                     |
| cg16104915 | chr7:27203916-27206462    | HOXA9                      |
| cg16115720 | chr1:208084099-208084513  | CD34                       |
| cg16124981 | chr19:9896564-9896994     | ZNF846                     |
| cg16126280 | chr5:158527375-158527983  | AK123543                   |

|            |                          |                         |
|------------|--------------------------|-------------------------|
| cg16128701 | chr8:82192379-82193685   | FABP5                   |
| cg16132520 | chr7:134143116-134144063 | AKR1B1                  |
| cg16215203 | chr14:24803679-24804353  | ADCY4                   |
| cg16219246 | chr4:57396749-57397269   | THEGL                   |
| cg16332936 | chr22:19748651-19749189  | TBX1                    |
| cg16358679 | chr15:78556406-78557542  | DNAJA4                  |
| cg16367511 | chr2:74425445-74426423   | MTHFD2                  |
| cg16390139 | chr6:74161087-74162090   | CGAS                    |
| cg16460359 | chr15:72611947-72612802  | CELF6                   |
| cg16475755 | chr14:77964572-77965670  | ISM2                    |
| cg16551483 | chr17:4981358-4981979    | ZFP3                    |
| cg16561266 | chr17:62774367-62777797  | 3PTFP1-KPNA2P3; ARHGAP2 |
| cg16580499 | chr18:76737006-76741244  | SALL3                   |
| cg16624692 | chr11:65601070-65601551  | SNX32                   |
| cg16633750 | chr7:2558372-2559967     | LFNG                    |
| cg16655905 | chr19:38754847-38755699  | SPINT2                  |
| cg16676492 | chr15:34806491-34807382  |                         |
| cg16686137 | chr19:48837142-48837549  | TMEM143                 |
| cg16732469 | chr17:4981358-4981979    | ZFP3                    |
| cg16734164 | chr19:41316544-41317318  | CYP2T1P                 |
| cg16775746 | chr22:42353660-42353900  |                         |
| cg16778903 | chr15:72611947-72612802  | CELF6                   |
| cg16779463 | chr17:75368689-75370506  | SEPTIN9                 |
| cg16820186 | chr11:17373020-17373665  | NCR3LG1                 |
| cg16857858 | chr7:27212417-27214396   | HOXA1 ; HOXA1 -HOXA9    |
| cg16859924 | chr17:20059029-20060060  | SPECC1                  |
| cg16867584 | chr19:49199965-49200184  | FUT2                    |
| cg16882226 | chr2:101033607-101034296 | CHST1                   |
| cg16896847 | chr8:144510851-144513957 | MAFA                    |
| cg16915821 | chr11:12029738-12030841  | DKK3                    |
| cg16977570 | chr13:24152900-24154140  | TNFRSF19                |
| cg16980360 | chr17:29298047-29298606  | RNF135                  |
| cg17003293 | chr14:36002599-36005013  | INSM2                   |
| cg17021218 | chr10:88730555-88731632  | AGAP11; ADIRF           |
| cg17035412 | chr7:26415747-26416891   |                         |
| cg17054969 | chr12:48397890-48398731  | COL2A1                  |
| cg17088631 | chr1:53098630-53099303   | SHISAL2A                |
| cg17172980 | chr3:196755678-196757374 | MELTF                   |
| cg17180977 | chr1:228134423-228136282 | WNT9A                   |
| cg17202086 | chr11:77122737-77123088  | PAK1                    |
| cg17222164 | chr17:43339125-43339832  | SPATA32; MAP3K14-AS1    |
| cg17228900 | chr6:391189-393790       | IRF4                    |
| cg17246382 | chr15:78556406-78557542  | DNAJA4                  |
| cg17267805 | chr10:44879715-44882391  | CXCL12                  |
| cg17299935 | chr17:74533282-74534566  | PRCD; CYGB              |
| cg17300544 | chr17:75368689-75370506  | SEPTIN9                 |
| cg17306261 | chr14:65016517-65016909  | PPP1R36                 |
| cg17321883 | chr3:49755764-49757317   | AMIGO3; GMPPB; RNF123   |
| cg17373442 | chr3:142837886-142840838 | CHST2                   |
| cg17409893 | chr19:42901017-42901375  | LIPE-AS1                |

|            |                           |                   |
|------------|---------------------------|-------------------|
| cg17419241 | chr19:19738573-19739821   | LAPAR2            |
| cg17429382 | chr19:3785512-3786653     | MATK              |
| cg17466857 | chr7:27225051-27225629    | HOXA11; HOXA11-AS |
| cg17567560 | chr10:105036629-105038084 | INA               |
| cg17577122 | chr22:19510872-19512254   | CLDN5             |
| cg17666539 | chr19:7926591-7928752     | EVI5L             |
| cg17716617 | chr1:33219428-33220028    | KIAA1522          |
| cg17737146 | chr3:169529876-169530435  | LRRC34            |
| cg17757602 | chr5:42951077-42952410    |                   |
| cg17780956 | chr4:156297602-156298094  | MAP9              |
| cg17802942 | chr3:138663719-138666346  | FOXL2; FOXL2NB    |
| cg17812788 | chr17:40332598-40333471   | KCNH4             |
| cg17853216 | chr10:81002110-81003687   | ZMIZ1             |
| cg17858328 | chr1:92945908-92952609    | GFI1              |
| cg17904852 | chr3:48698336-48701667    | CELSR3            |
| cg17930034 | chr14:65016517-65016909   | PPP1R36           |
| cg17960926 | chr19:42901017-42901375   | LIPE-AS1          |
| cg17969084 | chr7:27190275-27191115    | HOXA-AS3          |
| cg18049676 | chr5:177540208-177541234  | N4BP3             |
| cg18118033 | chr1:26686517-26687281    | CRYBG2            |
| cg18146843 | chr1:53098630-53099303    | SHISAL2A          |
| cg18202336 | chr15:99190447-99194559   | IGF1R; IRAIN      |
| cg18209835 | chr7:6543016-6543598      | GRID2IP           |
| cg18210732 | chr11:69517841-69519929   | FGF19             |
| cg18233405 | chr8:98289605-98290404    | TSPYL5            |
| cg18245660 | chr8:54791846-54795141    | RGS2              |
| cg18255595 | chr13:20735044-20736157   | GJA3              |
| cg18260625 | chr5:42951077-42952410    |                   |
| cg18285309 | chr1:40156931-40158514    | HPCAL4            |
| cg18309286 | chr11:77122737-77123088   | PAK1              |
| cg18331004 | chr20:1783825-1784552     |                   |
| cg18339788 | chr19:41641308-41642082   |                   |
| cg18349835 | chr7:158936508-158938492  | VIPR2             |
| cg18354742 | chr19:38754847-38755699   | SPINT2            |
| cg18356974 | chr7:128809090-128809393  | TSPAN33           |
| cg18368487 | chr10:128993506-128995167 | DOCK1             |
| cg18409528 | chr2:74740456-74743795    | TLX2              |
| cg18410627 | chr9:129677707-129678009  | RALGPS1           |
| cg18423852 | chr7:150652808-150653080  | KCNH2             |
| cg18424634 | chr3:147126989-147128999  | ZIC1              |
| cg18429863 | chr8:73448660-73449725    | KCNB2             |
| cg18456523 | chr5:54516268-54516919    | MCIDAS            |
| cg18477204 | chr14:70038109-70040302   | CCDC177           |
| cg18486102 | chr12:50297581-50297988   | FAIM2             |
| cg18489434 | chr14:77227570-77228691   | VASH1             |
| cg18514820 | chr10:17270431-17272617   | VIM; VIM-AS1      |
| cg18558647 | chr15:93198375-93199181   | FAM174B           |
| cg18588589 | chr6:29521111-29521833    | OR2I1P            |
| cg18607529 | chr7:50343758-50344519    | IKZF1             |
| cg18630040 | chr6:46702737-46703316    | PLA2G7            |

|            |                           |                     |
|------------|---------------------------|---------------------|
| cg18638914 | chr4:778662-780592        | CPLX1               |
| cg18675043 | chr10:105452339-105453230 | SH3PXD2A            |
| cg18691800 | chr6:17280740-17282334    | RBM24               |
| cg18696576 | chr6:34202568-34206193    | HMGA1               |
| cg18716164 | chr19:30015782-30021367   | VSTM2B              |
| cg18723937 | chr7:37955623-37956555    | SFRP4; EPDR1        |
| cg18772588 | chr20:61806255-61810867   | MIR124-3            |
| cg18786873 | chr1:110610266-110613303  | ALX3                |
| cg18794404 | chr10:22540708-22542739   |                     |
| cg18798922 | chr2:171569878-171573904  | SP5                 |
| cg18818834 | chr6:52226754-52228006    | PAQR8               |
| cg18853935 | chr7:25896714-25896925    |                     |
| cg18855096 | chr9:124061806-124062229  | GSN                 |
| cg18862481 | chr3:129693128-129694841  | TRH                 |
| cg18940113 | chr2:161263872-161264460  | RBMS1               |
| cg19037922 | chr4:108852496-108853387  | CYP2U1              |
| cg19045644 | chr4:57975861-57976916    | IGFBP7; IGFBP7-AS1  |
| cg19127283 | chr3:32858195-32860506    | TRIM71              |
| cg19155007 | chr3:183542497-183543804  | MAP6D1              |
| cg19244428 | chr6:3227026-3229688      | TUBB2B              |
| cg19250799 | chr1:47909713-47911020    |                     |
| cg19287823 | chr6:155316300-155317197  | TIAM2               |
| cg19306047 | chr19:19738573-19739821   | LAPAR2              |
| cg19337852 | chr19:38754847-38755699   | SPINT2              |
| cg19355186 | chr19:12305553-12306304   |                     |
| cg19397703 | chr19:43967248-43968625   | LYPD3               |
| cg19403104 | chr19:50030982-50031300   | RCN3                |
| cg19424265 | chr20:825268-826276       | FAM11 A             |
| cg19435033 | chr17:19648140-19648492   | ALDH3A1             |
| cg19442495 | chr3:142837886-142840838  | CHST2               |
| cg19504702 | chr5:153862143-153862451  |                     |
| cg19554255 | chr17:75368689-75370506   | SEPTIN9             |
| cg19585816 | chr8:41753341-41755250    | ANK1                |
| cg19590532 | chr1:25255528-25259005    | RUNX3               |
| cg19595750 | chr12:133065844-133066393 | FBRSL1              |
| cg19665644 | chr11:13030331-13032584   | RASSF1 ; RASSF1 -DT |
| cg19706516 | chr1:151103686-151106100  | SEMA6C              |
| cg19714957 | chr19:19843483-19843943   | ZNF14               |
| cg19722720 | chr1:113050814-113052301  | WNT2B               |
| cg19734163 | chr7:138720045-138721019  | ZC3HAV1L            |
| cg19752891 | chr19:4304543-4305122     | FSD1                |
| cg19761115 | chr5:178487147-178487921  | ZNF354C             |
| cg19763319 | chr19:50316212-50316469   | FUZ                 |
| cg19763809 | chr2:98703355-98703889    | VWA3B               |
| cg19837790 | chr10:97802872-97804262   | CCNJ; ENTPD1-AS1    |
| cg19850348 | chr15:55879793-55881228   | PYGO1               |
| cg19861117 | chr19:46456210-46456503   | NOVA2               |
| cg19863210 | chr8:142138209-142139342  | DENND               |
| cg19875368 | chr6:91320891-91321219    |                     |
| cg19879075 | chr10:73846807-73848233   | SPOCK2              |

|            |                           |               |
|------------|---------------------------|---------------|
| cg19900615 | chr1:41267920-41268398    | KCNQ4         |
| cg19908577 | chr4:115519423-115520932  | UGT8          |
| cg19929126 | chr7:28995306-28998541    | TRIL          |
| cg19974428 | chr7:98467024-98468058    | TMEM13        |
| cg20000718 | chr4:41869175-41869459    |               |
| cg20011402 | chr10:17495408-17496721   | ST8SIA6       |
| cg20018469 | chr10:17270431-17272617   | VIM; VIM-AS1  |
| cg20056542 | chr15:53080459-53083699   | ONECUT1       |
| cg20070026 | chr14:102247661-102248279 | PPP2R5C       |
| cg20078466 | chr7:50343758-50344519    | IKZF1         |
| cg20166714 | chr12:113592204-113592620 | CFAP73        |
| cg20255775 | chr12:48397890-48398731   | COL2A1        |
| cg20275528 | chr17:75368689-75370506   | SEPTIN9       |
| cg20340508 | chr21:34442207-34444543   | OLIG1         |
| cg20358834 | chr11:66623621-66626614   | LRNF4         |
| cg20381020 | chr11:66623621-66626614   | LRNF4         |
| cg20383948 | chr21:46897842-46898158   | COL18A1       |
| cg20384898 | chr6:1624186-1625468      | GMD5          |
| cg20399509 | chr21:47717236-47718059   | YBEY          |
| cg20401551 | chr22:20790639-20792665   | SCARF2        |
| cg20419623 | chr20:48598960-48599657   | SNAI1         |
| cg20495645 | chr22:45403037-45406372   | PHF21B        |
| cg20577019 | chr1:150121696-150123078  | PLEKHO1       |
| cg20684180 | chr3:38080629-38081187    | DLEC1         |
| cg20707679 | chr19:3434930-3435417     | NFIC          |
| cg20744625 | chr10:64574661-64578778   | EGR2          |
| cg20748955 | chr11:118016238-118016984 | SCN4B         |
| cg20749741 | chr2:263401-265238        | SH3YL1; ACP1  |
| cg20761860 | chr5:131991555-131992304  | IL13; TH2LCRR |
| cg20776829 | chr4:90758009-90758870    | SNCA          |
| cg20797142 | chr1:6051596-6052955      | NPHP4; KCNAB2 |
| cg20817902 | chr4:81123509-81124318    | PRDM8         |
| cg20950465 | chr1:53067881-53068608    | GPX7          |
| cg20961591 | chr19:38754847-38755699   | SPINT2        |
| cg20971220 | chr19:50554013-50554492   |               |
| cg21007414 | chr11:76381450-76382295   | LRRC32        |
| cg21038156 | chr7:158936508-158938492  | VIPR2         |
| cg21046967 | chr17:37761692-37763551   | NEUROD2       |
| cg21074827 | chr3:158288801-158289271  | MLF1          |
| cg21101720 | chr17:27939299-27940770   | ANKRD13B      |
| cg21115608 | chr13:20735044-20736157   | GJA3          |
| cg21144922 | chr1:109203594-109204378  | HENMET1       |
| cg21158411 | chr9:130689379-130690215  | PIP5KL1       |
| cg21195185 | chr4:76555367-76556079    | CDKL2         |
| cg21249376 | chr9:27528358-27528725    | MOB3B         |
| cg21277995 | chr6:391189-393790        | IRF4          |
| cg21383810 | chr12:65514879-65515863   | WIF1          |
| cg21384402 | chr10:105036629-105038084 | INA           |
| cg21404045 | chr7:27231806-27233097    |               |
| cg21424782 | chr20:48598960-48599657   | SNAI1         |

|            |                           |                     |
|------------|---------------------------|---------------------|
| cg21425842 | chr6:26240698-26240951    | HIST1H4F            |
| cg21447550 | chr1:223536843-223538628  | SUSD4               |
| cg21463763 | chr20:3713160-3713515     | HSPA12B             |
| cg21472506 | chr2:63283937-63284147    | OTX1                |
| cg21497607 | chr2:74425445-74426423    | MTHFD2              |
| cg21540810 | chr19:53141176-53141813   | ZNF83               |
| cg21554552 | chr3:50377804-50378540    | RASSF1              |
| cg21658235 | chr8:22456092-22456508    | c8orf58             |
| cg21692846 | chr11:134145560-134147180 | GLB1L3              |
| cg21773872 | chr7:30721373-30722445    | CRHR2               |
| cg21889472 | chr5:42992034-42992955    | FLJ32255            |
| cg21901946 | chr7:127744195-127744554  |                     |
| cg21908638 | chr3:101497831-101498648  | NXPE3               |
| cg21940568 | chr19:52207133-52207731   | SPACA6              |
| cg21962901 | chr19:18543829-18549161   | ISYNA1              |
| cg22054918 | chr4:81123509-81124318    | PRDM8               |
| cg22066230 | chr11:66034752-66035054   | RAB1B               |
| cg22076972 | chr19:6740670-6741203     | TRIP1               |
| cg22160000 | chr1:45251963-45252292    | BEST4               |
| cg22168369 | chr1:85462586-85463435    | MCOLN2              |
| cg22322863 | chr17:30813178-30815239   | CDK5R1              |
| cg22345692 | chr5:32709911-32714450    | NPR3                |
| cg22352818 | chr2:97192978-97193383    |                     |
| cg22367989 | chr2:206546604-206547566  | NRP2                |
| cg22402852 | chr4:108852496-108853387  | CYP2U1              |
| cg22409276 | chr15:40763163-40764196   | CHST14              |
| cg22418737 | chr7:139930066-139930356  |                     |
| cg22447539 | chr7:5632336-5634555      | FSCN1               |
| cg22465516 | chr17:54910497-54912470   | DGKE; c17orf67      |
| cg22535307 | chr15:48936811-48938577   | FBN1                |
| cg22546696 | chr15:41952536-41953222   | MGA                 |
| cg22740547 | chr11:13030331-13032584   | RASSF1 ; RASSF1 -DT |
| cg22762844 | chr2:95690858-95692431    | MAL                 |
| cg22789900 | chr1:226411008-226411880  | MIXL1               |
| cg22791936 | chr6:137242316-137245442  | SLC35D3             |
| cg22815953 | chr20:48598960-48599657   | SNAI1               |
| cg22884130 | chr22:32026298-32026874   | PISD                |
| cg22902177 | chr3:129323916-129325332  | PLXND1              |
| cg22905274 | chr4:154170369-154170600  | TRIM2               |
| cg22963915 | chr19:3785512-3786653     | MATK                |
| cg22979783 | chr2:72371122-72375004    | CYP26B1             |
| cg23003534 | chr10:105036629-105038084 | INA                 |
| cg23029526 | chr1:21616381-21617101    | ECE1                |
| cg23052826 | chr2:232478360-232479925  |                     |
| cg23058177 | chr2:10219803-10221016    | CYS1                |
| cg23125200 | chr13:20806017-20806867   | GJB6                |
| cg23148701 | chr12:64061837-64062774   | DPY19L2             |
| cg23152743 | chr7:139167481-139168712  | KLRG2               |
| cg23229261 | chr2:63283937-63284147    | OTX1                |
| cg23255835 | chr2:29337984-29338909    | CLIP4               |

|            |                           |                      |
|------------|---------------------------|----------------------|
| cg23258881 | chr1:150121696-150123078  | PLEKHO1              |
| cg23265500 | chr14:65016517-65016909   | PPP1R36              |
| cg23297477 | chr16:66638255-66639561   | CMTM3                |
| cg23305567 | chr19:54369388-54369809   | MYADM                |
| cg23337116 | chr4:53728038-53729000    | RASL11B              |
| cg23426238 | chr7:103086345-103086840  | SLC26A5              |
| cg23428985 | chr2:29337984-29338909    | CLIP4                |
| cg23511613 | chr2:88751336-88752865    | FOXI3                |
| cg23528400 | chr3:32858195-32860506    | TRIM71               |
| cg23620340 | chr1:63782395-63790471    | FOXD3; FOXD3-AS1     |
| cg23634087 | chr20:50721311-50721912   | ZFP64                |
| cg23684074 | chr7:128470444-128471161  | FLNC                 |
| cg23728669 | chr11:63258379-63258804   | HRASLS5              |
| cg23735712 | chr4:40858885-40859162    | APBB2                |
| cg23754431 | chr11:69258150-69258544   |                      |
| cg23782001 | chr7:138720045-138721019  | ZC3HAV1L             |
| cg23837799 | chr15:31683985-31685824   |                      |
| cg23844174 | chr1:2064629-2064855      | PRKCZ                |
| cg23874561 | chr4:81124469-81124845    | PRDM8                |
| cg23912429 | chr10:17270431-17272617   | VIM; VIM-AS1         |
| cg23923856 | chr1:113050814-113052301  | WNT2B                |
| cg23965061 | chr8:22960385-22960927    | TNFRSF1 C            |
| cg24031355 | chr10:22634001-22634862   | SPAG6                |
| cg24037897 | chr10:16561605-16563822   | C1QL3                |
| cg24078363 | chr14:77227570-77228691   | VASH1                |
| cg24084504 | chr4:42399153-42400802    | SHISA3               |
| cg24098326 | chr10:123922851-123923542 | TACC2                |
| cg24102266 | chr1:33219428-33220028    | KIAA1522             |
| cg24106636 | chr1:116380360-116382364  | NHLH2                |
| cg24159214 | chr3:50402104-50402942    | CACNA2D2             |
| cg24166864 | chr12:65514879-65515863   | WIF1                 |
| cg24217704 | chr2:166649910-166650966  | GALNT3               |
| cg24217844 | chr6:137242316-137245442  | SLC35D3              |
| cg24276681 | chr18:2905951-2907348     | EMILIN2              |
| cg24300924 | chr18:12407716-12408242   | SLMO1                |
| cg24331301 | chr10:73156165-73157954   | CDH23                |
| cg24368902 | chr10:43248524-43250912   |                      |
| cg24385580 | chr17:28088028-28088607   | SSH2                 |
| cg24393316 | chr9:100615235-100617510  | FOXE1                |
| cg24405179 | chr1:226411008-226411880  | MIXL1                |
| cg24412501 | chr11:13689589-13690724   | FAR1; FAR1-IT1       |
| cg24432073 | chr4:76555367-76556079    | CDKL2                |
| cg24448269 | chr17:54910497-54912470   | DGKE; c17orf67       |
| cg24525457 | chr7:100091181-100091598  | NYAP1                |
| cg24542751 | chr17:43339125-43339832   | SPATA32; MAP3K14-AS1 |
| cg24588482 | chr1:160370113-160370658  | VANGL2               |
| cg24599205 | chr1:110752257-110754794  | KCNC4                |
| cg24610236 | chr7:30721373-30722445    | CRHR2                |
| cg24626079 | chr12:4378367-4382222     | CCND2; CCND2-AS1     |
| cg24662718 | chr1:108507252-108507841  | VAV3; VAV3-AS1       |

|            |                           |                           |
|------------|---------------------------|---------------------------|
| cg24685006 | chr1:36042433-36043444    | TFAP2E                    |
| cg24718866 | chr2:25391073-25391875    | POMC                      |
| cg24722112 | chr3:49755764-49757317    | AMIGO3; GMPPB; RNF123     |
| cg24724633 | chr19:36909282-36909854   | ZFP82                     |
| cg24740531 | chr18:60985504-60985741   | BCL2                      |
| cg24746100 | chr2:88751336-88752865    | FOXI3                     |
| cg24800655 | chr12:133065844-133066393 | FBRSL1                    |
| cg24804544 | chr7:6543796-6544108      | GRID2IP                   |
| cg24816460 | chr6:4775132-4777550      | CDYL                      |
| cg24856258 | chr15:41952536-41953222   | MGA                       |
| cg24876960 | chr5:1881925-1887743      | IRX4; CTD2194D22.4        |
| cg24886267 | chr5:167956220-167957371  | FBLL1                     |
| cg24940138 | chr17:41363728-41364273   | TMEM1 6A                  |
| cg25109009 | chr16:69760294-69760506   | NQO1                      |
| cg25137711 | chr1:48058794-48059230    |                           |
| cg25152631 | chr3:140660335-140661602  | SLC25A36                  |
| cg25253217 | chr19:47776371-47778740   | CCDC9; INAFM1             |
| cg25287474 | chr9:14693031-14693576    | ZDHHC21                   |
| cg25307318 | chr10:123922851-123923542 | TACC2                     |
| cg25331703 | chr15:101458287-101460223 | LRRK1                     |
| cg25335544 | chr3:49906738-49907482    | CAMKV                     |
| cg25340966 | chr1:119531992-119532196  | TBX15                     |
| cg25344734 | chr11:13030331-13032584   | RASSF1                    |
| cg25375340 | chr1:85462586-85463435    | MCOLN2                    |
| cg25466090 | chr1:2064629-2064855      | PRKCZ                     |
| cg25486143 | chr3:50377804-50378540    | RASSF1                    |
| cg25513173 | chr15:83875649-83877079   | HDGFL3                    |
| cg25524962 | chr13:20735044-20736157   | GJA3                      |
| cg25528916 | chr19:4328659-4328865     | STAP2                     |
| cg25577023 | chr14:103394398-103397070 | AMN                       |
| cg25622366 | chr2:63281035-63281347    | OTX1                      |
| cg25623934 | chr2:12856626-12859019    | TRIB2                     |
| cg25645687 | chr3:138663719-138666346  | FOXL2; FOXL2NB; LINC 1391 |
| cg25693302 | chr18:55862654-55862873   | NEDD4L                    |
| cg25694349 | chr12:133065844-133066393 | FBRSL1                    |
| cg25714826 | chr16:85783863-85785131   | C16orf74                  |
| cg25723050 | chr1:224803638-224805314  | CNIH3                     |
| cg25737323 | chr2:29337984-29338909    | CLIP4                     |
| cg25741023 | chr10:102891011-102891794 | TLX1                      |
| cg25764899 | chr1:47696505-47698197    | TAL1                      |
| cg25823419 | chr3:179168736-179169593  | GNB4                      |
| cg25830696 | chr17:42030174-42030941   | PYY                       |
| cg25848557 | chr1:108507252-108507841  | VAV3; VAV3-AS1            |
| cg25862644 | chr10:77155129-77169600   | ZNF5 3; ZNF5 3-AS2        |
| cg25876509 | chr7:97501184-97501919    | ASNS                      |
| cg25881804 | chr20:21080930-21082824   |                           |
| cg25886284 | chr19:36909282-36909854   | ZFP82                     |
| cg25945732 | chr2:263401-265238        | SH3YL1; ACP1              |
| cg25947878 | chr2:20068429-20068907    | LINC 954                  |
| cg26005578 | chr11:13030331-13032584   | RASSF1                    |



|            |                           |                      |
|------------|---------------------------|----------------------|
| cg26009486 | chr14:24837873-24838324   | NFATC4               |
| cg26013553 | chr1:111216245-111217937  | KCNA3                |
| cg26015401 | chr19:49436696-49437055   | DHDH                 |
| cg26029345 | chr8:22960385-22960927    | TNFRSF1 C            |
| cg26043257 | chr4:15779999-15780729    | CD38                 |
| cg26107850 | chr1:228645197-228646434  | HIST3H2A; HIST3H2BB  |
| cg26107890 | chr3:124860570-124861019  | SLC12A8              |
| cg26117023 | chr2:74781495-74782685    | DOK1; LOXL3          |
| cg26173997 | chr4:76555367-76556079    | CDKL2                |
| cg26195583 | chr4:41869175-41869459    |                      |
| cg26211360 | chr12:122667649-122668038 | LRRC43               |
| cg26240185 | chr11:13689589-13690724   | FAR1                 |
| cg26245531 | chr14:88459119-88459689   | GALC                 |
| cg26246928 | chr1:153650831-153652375  | NPR1                 |
| cg26253438 | chr1:203598472-203598853  | ATP2B4               |
| cg26259171 | chr19:49255779-49256495   | FUT1                 |
| cg26261793 | chr1:171810468-171811325  | DNM3                 |
| cg26279550 | chr12:66582696-66583345   | IRAK3                |
| cg26281453 | chr17:45810590-45811388   | TBX21                |
| cg26301389 | chr5:139047906-139048235  | CXXC5                |
| cg26322231 | chr7:138720045-138721019  | ZC3HAV1L             |
| cg26386852 | chr3:48693119-48694768    | CELSR3               |
| cg26397188 | chr12:65514879-65515863   | WIF1                 |
| cg26415547 | chr12:66582696-66583345   | IRAK3                |
| cg26425933 | chr10:115999009-115999603 | VWA2                 |
| cg26448406 | chr22:32026298-32026874   | PISD                 |
| cg26460092 | chr15:83775862-83776922   | TM6SF1               |
| cg26468478 | chr3:48693119-48694768    | CELSR3               |
| cg26470101 | chr2:173099483-173100098  |                      |
| cg26526379 | chr7:26415747-26416891    |                      |
| cg26570179 | chr8:99960498-99961438    | OSR2                 |
| cg26575690 | chr15:34728788-34729495   |                      |
| cg26620530 | chr12:115102688-115103982 |                      |
| cg26714410 | chr13:45149971-45152288   | TSC22D1; TSC22D1-AS1 |
| cg26742995 | chr17:43339125-43339832   | SPATA32              |
| cg26797073 | chr2:131129719-131130511  | PTPN18               |
| cg26802291 | chr19:19371676-19372393   | HAPLN4               |
| cg26857670 | chr7:27225051-27225629    | HOXA11-AS; HOXA11    |
| cg26870803 | chr11:66623621-66626614   | LRFN4; PC            |
| cg26919818 | chr5:177540208-177541234  | N4BP3                |
| cg26928125 | chr11:69517841-69519929   | FGF19                |
| cg26953749 | chr12:122667649-122668038 | LRRC43               |
| cg26954625 | chr19:19738573-19739821   | LAPAR2               |
| cg26983469 | chr10:17270431-17272617   | VIM; VIM-AS1         |
| cg26998044 | chr17:8868470-8869372     | PIK3R5               |
| cg27018380 | chr14:93389246-93389899   | CHGA                 |
| cg27028760 | chr16:2041826-2043026     | SYNGR3               |
| cg27071460 | chr5:40679503-40682081    | PTGER4; TTC33        |
| cg27085741 | chr7:143042509-143042867  | CLCN1                |
| cg27118059 | chr21:32929928-32932017   | TIAM1; AP 251.1      |

|            |                           |         |
|------------|---------------------------|---------|
| cg27127017 | chr12:113592204-113592620 | CCDC42B |
| cg27212234 | chr19:36048557-36049673   | ATP4A   |
| cg27239157 | chr3:183145428-183146790  | MCF2L2  |
| cg27304406 | chr15:83951981-83953930   | BNC1    |
| cg27306119 | chr2:9143128-9144630      | MBOAT2  |
| cg27382405 | chr12:49942787-49943435   | KCNH3   |
| cg27395939 | chr11:17373020-17373665   | NCR3LG1 |
| cg27452341 | chr7:143042509-143042867  | CLCN1   |
| cg27506082 | chr2:207139337-207140031  | ZDBF2   |
| cg27513979 | chr13:96742139-96744162   | HS6ST3  |
| cg27558479 | chr2:74425445-74426423    | MTHFD2  |
| cg27587125 | chr1:109203594-109204378  | HENMT1  |
| cg27605748 | chr5:42951077-42952410    |         |
| cg27633530 | chr7:50343758-50344519    | IKZF1   |
| cg27636310 | chr1:46632690-46632932    | PIK3R3  |

Table S3

| CpG ID | CpG site (hg19) Illumina 450K Array | CpG site (hg19) | CGI (hg19)                | Gene name                  | Gene complete name                                                           | Genomic region |
|--------|-------------------------------------|-----------------|---------------------------|----------------------------|------------------------------------------------------------------------------|----------------|
| CpG#1  | cg22789900                          | chr1:226411715  | chr1:226411008-226411880  | <i>MIXL1</i>               | Mix Paired-Like Homeobox                                                     | Gene body      |
| CpG#2  | cg11173146                          | chr13:107187413 | chr13:107186469-107189024 | <i>EFNB2</i>               | Ephrin B2                                                                    | Promoter       |
| CpG#3  | cg07689503                          | chr2:74426201   | chr2:74425445-74426423    | <i>MTHFD2</i>              | Methylenetetrahydrofolate Dehydrogenase 2                                    | Gene body      |
| CpG#4  | cg17003293                          | chr14:36003826  | chr14:36002599-36005013   | <i>INSM2</i>               | INSM Transcriptional Repressor 2                                             | Gene body      |
| CpG#5  | cg15386964                          | chr6:26250686   | chr6:26250437-26250827    | <i>HIST1H2BH;HIST1H3F</i>  | Histone Cluster 1, H3f                                                       | Promoter       |
| CpG#6  | cg04907523                          | chr1:213124896  | chr1:213123648-213125092  | <i>VASH2</i>               | Vasohibin 2                                                                  | Gene body      |
| CpG#7  | cg16896847                          | chr8:144512042  | chr8:144510851-144513957  | <i>MAFA</i>                | MAF BZIP Transcription Factor A                                              | Gene body      |
| CpG#8  | cg15969216                          | chr13:45150263  | chr13:45149971-45152288   | <i>TSC22D1</i>             | Transforming growth factor-beta-stimulated clone-22                          | Promoter       |
| CpG#9  | cg08296831                          | chr11:65554175  | chr11:65553750-65555573   | <i>OVOL1</i>               | Ovo Like Transcriptional Repressor 1                                         | Promoter       |
| CpG#10 | cg08042316                          | chr7:139930256  | chr7:139930066-139930356  |                            |                                                                              | Intergenic     |
| CpG#11 | cg20776829                          | chr4:90758797   | chr4:90758009-90758870    | <i>SNCA</i>                | Synuclein Alpha                                                              | Promoter       |
| CpG#12 | cg17567560                          | chr10:105036863 | chr10:105036629-105038084 | <i>INA</i>                 | Internexin Neuronal Intermediate Filament Protein Alpha                      | Promoter       |
| CpG#13 | cg06341513                          | chr11:61277017  | chr11:61275826-61277329   | <i>LRRCC10B</i>            | Leucine Rich Repeat Containing 10B                                           | Gene body      |
| CpG#14 | cg27636310                          | chr1:46632696   | chr1:46632690-46632932    | <i>PIK3R3</i>              | Phosphoinositide-3-Kinase Regulatory Subunit 3                               | Gene body      |
| CpG#15 | cg25830696                          | chr17:42030480  | chr17:42030174-42030941   | <i>PYY</i>                 | Peptide Tyrosine Tyrosine                                                    | Gene body      |
| CpG#16 | cg14996783                          | chr7:28996903   | chr7:28995306-28998541    | <i>TRIL</i>                | TLR4 Interactor With Leucine Rich Repeats                                    | Gene body      |
| CpG#17 | cg05040544                          | chr13:107188257 | chr13:107186469-107189024 | <i>EFNB2</i>               | Ephrin B2                                                                    | Promoter       |
| CpG#18 | cg01939477                          | chr11:43602880  | chr11:43602546-43603215   | <i>MIR129-2</i>            | MicroRNA 129-2                                                               | Promoter       |
| CpG#19 | cg26468478                          | chr3:48693598   | chr3:48693119-48694768    | <i>CELSR3</i>              | Cadherin EGF LAG Seven-Pass G-Type Receptor 3                                | Gene body      |
| CpG#20 | cg17466857                          | chr7:27225528   | chr7:27225051-27225629    | <i>HOXA11, HOXA11-AS</i>   | Homeobox A11; HOXA11 Antisense RNA                                           | Gene body      |
| CpG#21 | cg04321866                          | chr13:107188417 | chr13:107186469-107189024 | <i>EFNB2</i>               | Ephrin B2                                                                    | Promoter       |
| CpG#22 | cg07435294                          | chr11:65554356  | chr11:65553750-65555573   | <i>OVOL1</i>               | Ovo Like Transcriptional Repressor 1                                         | Promoter       |
| CpG#23 | cg13325154                          | chr10:104001240 | chr10:104000255-104001741 | <i>PITX3</i>               | Paired Like Homeodomain 3                                                    | Promoter       |
| CpG#24 | cg16460359                          | chr15:72612630  | chr15:72611947-72612802   | <i>CELFG</i>               | CUGBP Elav-Like Family Member 6                                              | Promoter       |
| CpG#25 | cg11672054                          | chr1:228645482  | chr1:228645197-228646434  | <i>HIST3H2A, HIST3H2BB</i> | Histone cluster 3 H2A; Histone Cluster 3, H2bb                               | Promoter       |
| CpG#26 | cg04281464                          | chr14:70014874  | chr14:70014544-70014993   |                            |                                                                              | Intergenic     |
| CpG#27 | cg18456523                          | chr5:54516805   | chr5:54516268-54516919    | <i>MCIDAS</i>              | Multiciliate Differentiation And DNA Synthesis Associated Cell Cycle Protein | Gene body      |
| CpG#28 | cg17300544                          | chr17:75369091  | chr17:75368689-75370506   | <i>SEPT9</i>               | Septin 9                                                                     | Promoter       |
| CpG#29 | cg03468349                          | chr2:264164     | chr2:263401-265238        | <i>SH3YL1</i>              | SH3 And SYL Domain Containing 1                                              | Promoter       |
| CpG#30 | cg05327835                          | chr4:996175     | chr4:995483-997541        | <i>IDUA</i>                | Alpha-L-Iduronidase                                                          | Gene body      |
| CpG#31 | cg11595545                          | chr1:111217497  | chr1:111216245-111217937  | <i>KCNA3</i>               | Potassium Voltage-Gated Channel Subfamily A Member 3                         | Promoter       |
| CpG#32 | cg13204512                          | chr17:29298184  | chr17:29298047-29298606   | <i>RNF135</i>              | Ring Finger Protein 135                                                      | Promoter       |
| CpG#33 | cg03063639                          | chr15:83776423  | chr15:83775862-83776922   | <i>TM6SF1</i>              | Transmembrane 6 Superfamily Member 1                                         | Promoter       |
| CpG#34 | cg04823311                          | chr7:28997486   | chr7:28995306-28998541    | <i>TRIL</i>                | TLR4 Interactor With Leucine Rich Repeats                                    | Gene body      |
| CpG#35 | cg25577023                          | chr14:103394900 | chr14:103394398-103397070 | <i>AMN</i>                 | Amnion Associated Transmembrane Protein                                      | Gene body      |
| CpG#36 | cg00922376                          | chr1:14026585   | chr1:14026482-14027200    | <i>PRDM2</i>               | PR/SET Domain 2                                                              | Promoter       |
| CpG#37 | cg14159026                          | chr6:105584552  | chr6:105584149-105585621  | <i>BVES</i>                | Blood Vessel Epicardial Substance                                            | Promoter       |
| CpG#38 | cg17373442                          | chr3:142839991  | chr3:142837886-142840838  | <i>CHST2</i>               | Carbohydrate Sulfotransferase 2                                              | Gene body      |
| CpG#39 | cg20275528                          | chr17:75369485  | chr17:75368689-75370506   | <i>SEPT9</i>               | Septin 9                                                                     | Promoter       |

## Supplementary Table S4

| Study        |                                                                  | n samples  |             |
|--------------|------------------------------------------------------------------|------------|-------------|
|              |                                                                  | NTs (>5)   | Tumor       |
| LIHC         | Liver Hepatocellular Carcinoma                                   | 50         | 380         |
| BLCA         | Bladder Urothelial Carcinoma                                     | 21         | 413         |
| BRCA         | Breast Invasive Carcinoma                                        | 98         | 790         |
| CHOL         | Cholangiocarcinoma                                               | 9          | 36          |
| COADREAD     | Colorectal Adenocarcinoma                                        | 45         | 398         |
| ESCA         | Esophageal Carcinoma                                             | 16         | 186         |
| HNSC         | Head and Neck Squamous Cell Carcinoma                            | 50         | 530         |
| KIRC         | Kidney Renal Clear Cell Carcinoma                                | 160        | 320         |
| LUAD         | Lung Adenocarcinoma                                              | 32         | 460         |
| LUNG         | Lung Squamous Cell Carcinoma                                     | 74         | 833         |
| LUSC         | Lung Squamous Cell Carcinoma                                     | 43         | 372         |
| PAAD         | Pancreatic Adenocarcinoma                                        | 10         | 185         |
| PRAD         | Prostate Adenocarcinoma                                          | 49         | 500         |
| THCA         | Thyroid Carcinoma                                                | 56         | 515         |
| UCEC         | Uterine Corpus Endometrial Carcinoma                             | 46         | 432         |
| ACC          | Adrenocortical Carcinoma                                         |            | 80          |
| CESC         | Cervical Squamous Cell Carcinoma and Endocervical Adenocarcinoma |            | 312         |
| DLBC         | Diffuse Large B-Cell Lymphoma                                    |            | 48          |
| GBM          | Glioblastoma Multiforme                                          |            | 153         |
| LAML         | Acute Myeloid Leukemia                                           |            | 194         |
| MESO         | Mesothelioma                                                     |            | 87          |
| OV           | Ovarian Serous Cystadenocarcinoma                                |            | 10          |
| SARC         | Sarcoma                                                          |            | 265         |
| SKCM         | Skin Cutaneous Melanoma                                          |            | 474         |
| STAD         | Stomach Adenocarcinoma                                           |            | 396         |
| TGCT         | Testicular Germ Cell Tumors                                      |            | 156         |
| THYM         | Thymoma                                                          |            | 124         |
| UCS          | Uterine Carcinosarcoma                                           |            | 57          |
| <b>TOTAL</b> |                                                                  | <b>759</b> | <b>8706</b> |
